# Supplementary material for: Translation reinitiation after uORFs does not fully protect mRNAs from nonsense-mediated decay
Source: PubMed Central journal article supplement (PMC10187673; doi:10.1261/rna.079525.122), 2023-06
Supplement: supp_079525.122_Supplemental_Material.pdf [file supp_079525.122_Supplemental_Material.pdf]

codons (uORF) or AAA codons (mt-uORF). A 16 nt spacer between the uORF and nLuc ORF allows specific detection of re-initiation. B-C) Ribosome toeprinting of lactimidomycin inhibited 80S ribosomes after start codon recognition on (B) small uORF nLuc reporter mRNA and (C) mutated uORF nLuc reporter mRNA from *in vitro* translation. Signal from duplicate samples is shown in black and red. D) Response of nLuc reporters that harbor an overlapping 3XAUG start codon uORF in HeLa cells. Here, the stop codon of the uORF (black) is downstream and out-of-frame of the start codon of nLuc (purple). Thus, active nLuc is only produced if a 43S PIC scans through the overlapping uORF (“leaky scanning”) and initiates at the start codon of nLuc. n=3 biological replicates. Bar represents the mean. Comparisons were made using a two-tailed unpaired *t*-test with Welch’s correction.

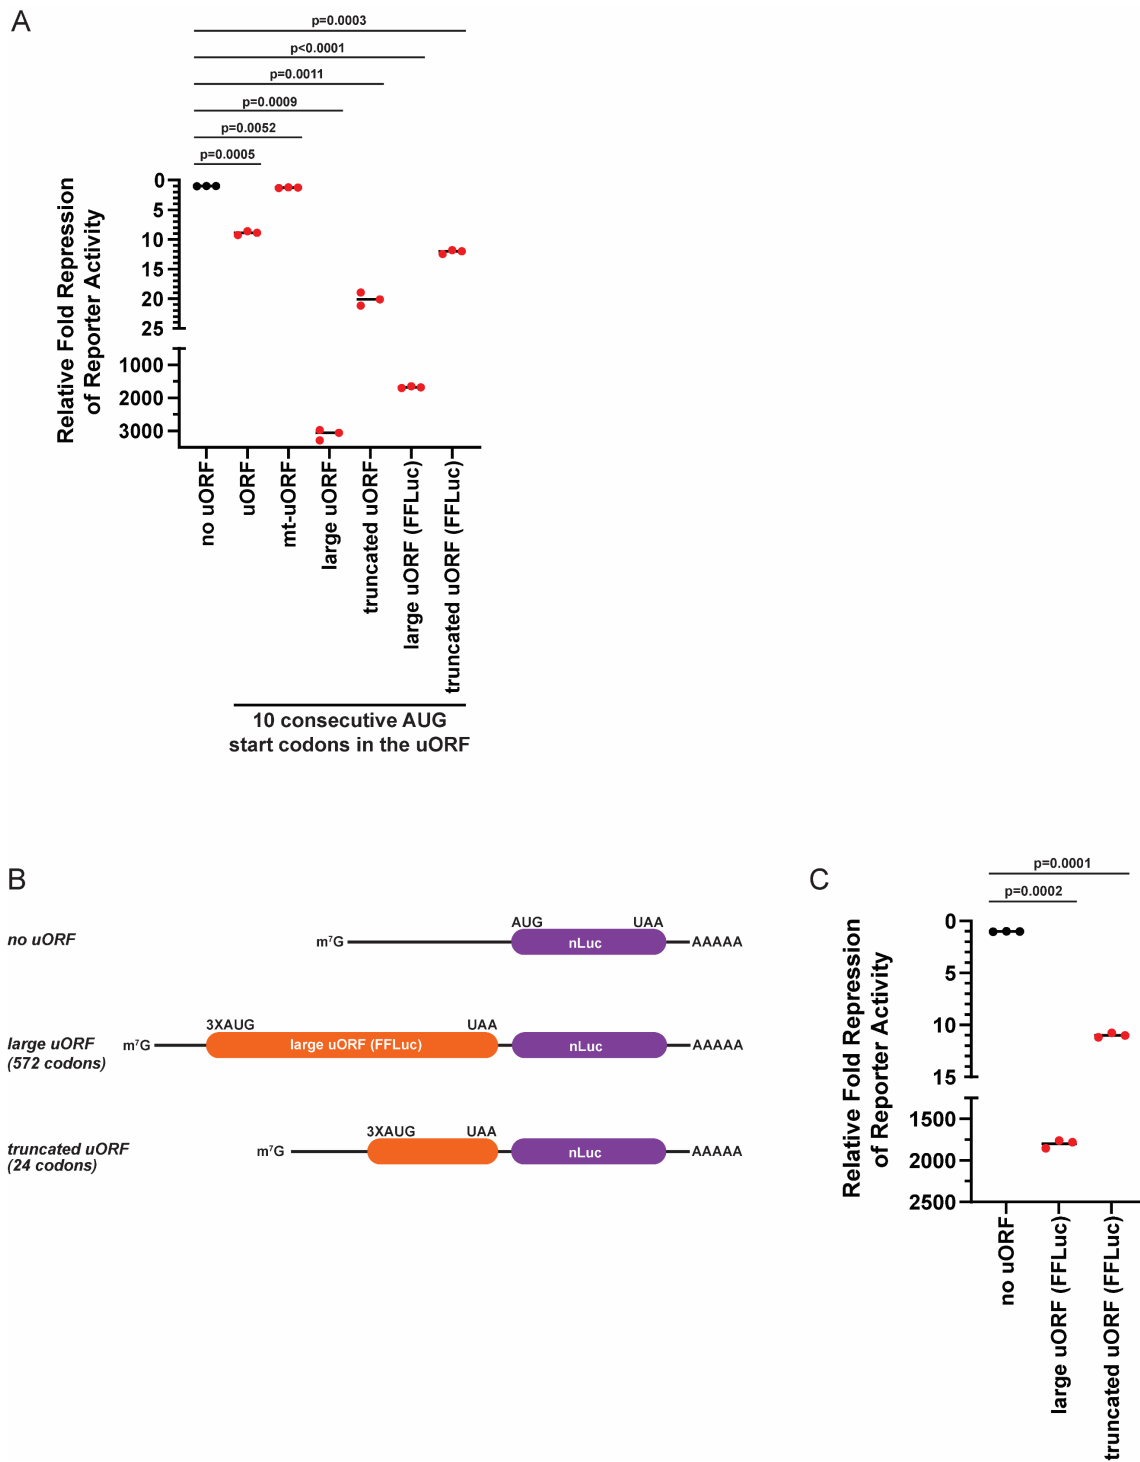

**Supplemental Figure 2. Less translation re-initiation after large uORFs is not strictly uORF sequence specific.** A) Response of nLuc reporters that harbor a small, mutant, large, or truncated uORF from *in vitro* translation. All uORFs had 10 consecutive AUG start codons as described in **Supplemental Figure 1A** (instead of the three AUG start codons in perfect Kozak

context in **Fig. 1**). Large and truncated uORFs using the FFLuc sequence are clearly labeled from those that used the original HT-GFP sequence. n=3 biological replicates. Bar represents the mean. Comparisons were made using a two-tailed unpaired *t*-test with Welch's correction.

B) The large uORF sequence described in **Fig. 1** was switched from HT-GFP to Firefly Luciferase (FFLuc). Three AUG start codons in perfect Kozak context were used to trap all scanning initiation complexes at the uORF. C) Response of nLuc reporters that harbor a large (FFLuc) or truncated uORF (FFLuc) from *in vitro* translation. Similar repression and rescue were seen here with FFLuc as the large uORF as observed with HT-GFP sequence in **Fig. 2**. n=3 biological replicates. Bar represents the mean. Comparisons were made using a two-tailed unpaired *t*-test with Welch's correction.

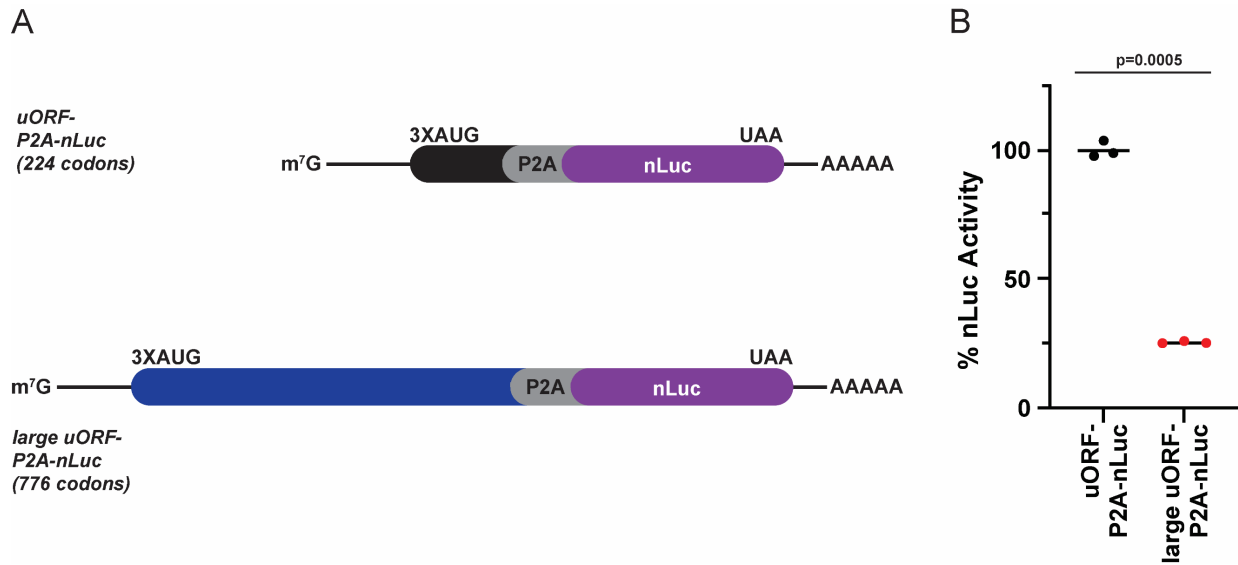

**Supplemental Figure 3. Small and large uORF P2A fusion reporters to test translation efficiency *in vitro*.** A) Insertion of the P2A “ribosome skipping motif” (gray) was used to assess the relative translation efficiency of reporters that harbored a 3XAUG start codon sequence without and with the large HT-GFP (blue) sequence upstream of the nLuc coding sequence (purple). B) Relative nLuc activity of the small and larger uORF P2A fusion reporters from *in vitro* translation. n=3 biological replicates. Bar represents the mean. Comparisons were made using a two-tailed unpaired *t*-test with Welch’s correction.

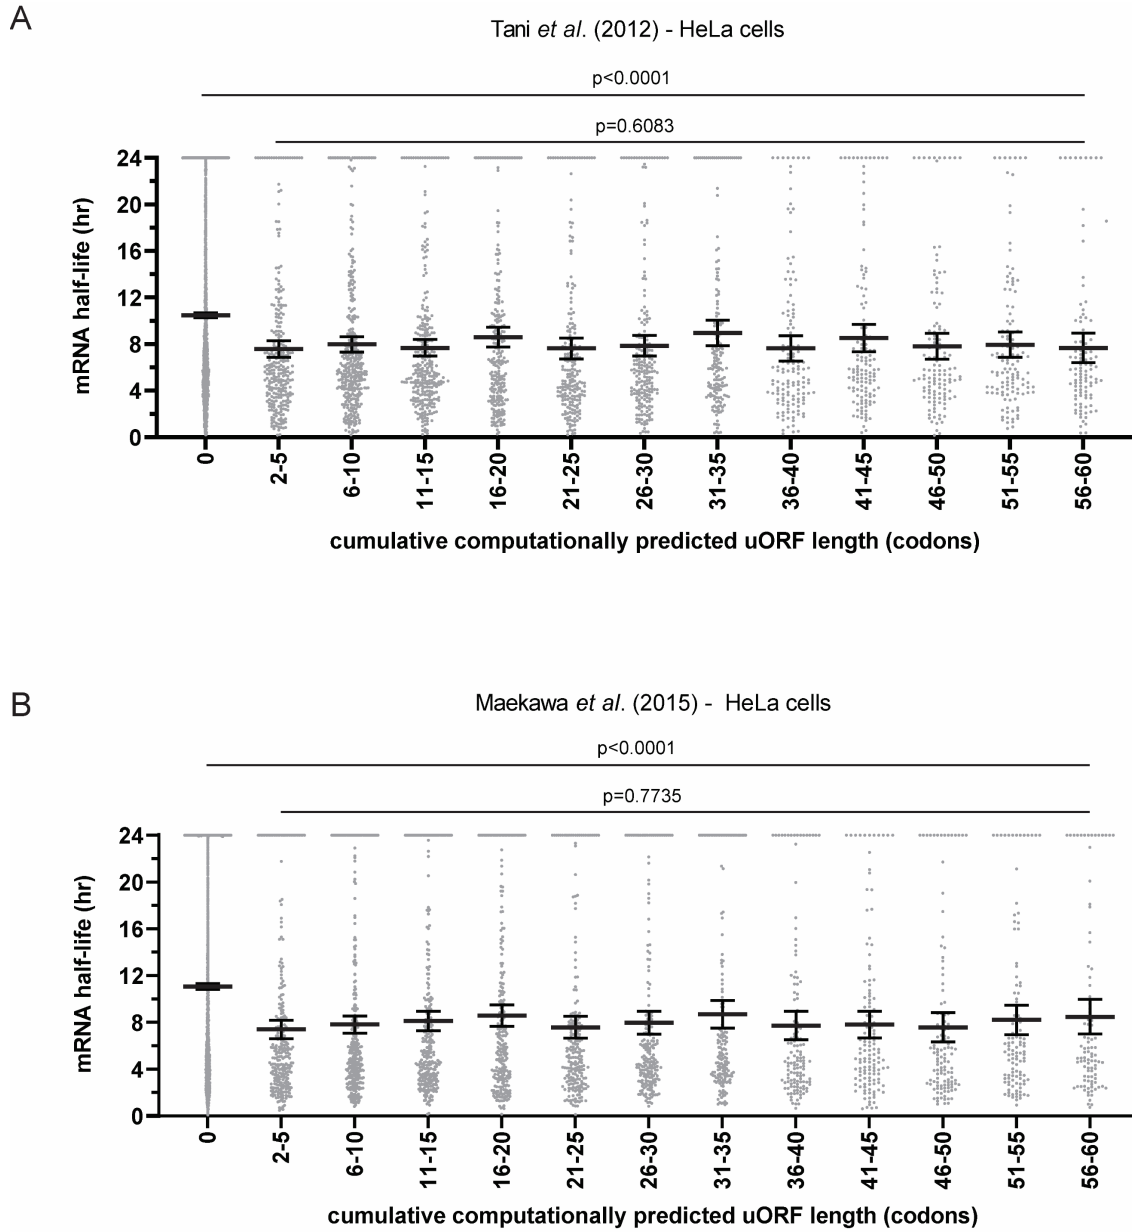

**Supplemental Figure 4. uORF length has minimal effect on mRNA stability in cells. A-B)**

Transcriptome-wide comparison of cumulative computationally predicted uORF length and mRNA half-life from Tani *et al.* (2012) (A) and Maekawa *et al.* (2015) (B). Bar represents the mean  $\pm$  95% confidence interval. One-way Welch's ANOVA was used to compare between cumulative uORF length bins.

**Sequences of reporters used in this study**

The plasmid backbone, reporter name, and restriction sites are given for each construct. For reference, nanoLuciferase (nLuc) is always highlighted in pink. The multiple start sites for the uORF and single stop codon are highlighted in yellow and red, respectively. The HT-GFP sequence, FFLuc sequence and IRES sequences are highlighted in green, blue, and turquoise, respectively. The unstructured CAA repeats are in lowercase. The P2A sequence is highlighted in gray. The strong hairpins used upstream of the IRES sequences is in bold. For the pTet-Off All-In-One (pTet-Off AIO) plasmids, the tight TRE promoter is shown in purple and the intron is underlined.

**pcDNA3.1+/no uORF nLuc (Sacl/Xbal)**

GAGCTCTCTGGCTAACTAGAGAACCCACTGCTTACTGGCTTATCGAAATTAATACGACTCA  
 CTATAGGCaacaacaacaacaacaacaacaacaacaacaacaacaacaacaacaacaacaaca  
 aaATGGTCTTCACACTCGAAGATTTTCGTTGGGGACTGGCGACAGACAGCCGGCTACAACCT  
 GGACCAAGTCCTTGAACAGGGAGGTGTGTCCAGTTTGTTCAGAATCTCGGGGTGTCCGT  
 AACTCCGATCCAAAGGATTGTCCTGAGCGGTGAAAATGGGCTGAAGATCGACATCCATGTC  
 ATCATCCCGTATGAAGGTCTGAGCGGCACCAAAATGGGCCAGATCGAAAAAATTTTTAAGG  
 TGGTGTACCCTGTGGATGATCATCACTTTAAGGTGATCCTGCACTATGGCACACTGGTAAT  
 CGACGGGGTTACGCCGAACATGATCGACTATTTCCGACGGCCGTATGAAGGCATCGCCGT  
 GTTCGACGGCAAAAAGATCACTGTAACAGGGACCCTGTGGAACGGCAACAAAATTATCGA  
 CGAGCGCCTGATCAACCCCGACGGCTCCCTGCTGTTCCGAGTAACCATCAACGGAGTGAC  
 CGGCTGGCGGCTGTGCGAACGCATTCTGGCGGACTACAAAGACCATGACGGTGATTATAA  
 AGATCATGACATCGATTACAAGGATGACGATGACAAGTAAAGGCCGCGACTCTAGA

**pcDNA3.1+/uORF nLuc (Sacl/Xbal)**

GAGCTCTCTGGCTAACTAGAGAACCCACTGCTTACTGGCTTATCGAAATTAATACGACTCA  
 CTATAGGCaacaacaacaacaacaacaacaacaacaacaacaacaacaacaacaacaacaaca  
 aacaccatggtcaccatggtcaccatggtc<sup>aa</sup>acaacaacaacaaca<sup>aa</sup>ATGGTCTTCACACTCGAAGATTTTCG  
 TGGGGACTGGCGACAGACAGCCGGCTACAACCTGGACCAAGTCCTTGAACAGGGAGGTG  
 GTCCAGTTTGTTCAGAATCTCGGGGTGTCCGTAACCTCCGATCCAAAGGATTGTCCTGAG  
 CGGTGAAAATGGGCTGAAGATCGACATCCATGTCATCATCCCGTATGAAGGTCTGAGCGG  
 CGACCAAATGGGCCAGATCGAAAAAATTTTTAAGGTGGTGTACCCTGTGGATGATCATCA  
 TTTAAGGTGATCCTGCACTATGGCACACTGGTAATCGACGGGGTTACGCCGAACATGATCG  
 ACTATTTCCGACGGCCGTATGAAGGCATCGCCGTGTTCGACGGCAAAAAGATCACTGTA  
 CAGGGACCCTGTGGAACGGCAACAAAATTATCGACGAGCGCCTGATCAACCCCGACGGCT  
 CCCTGCTGTTCCGAGTAACCATCAACGGAGTGACCGGCTGGCGGCTGTGCGAACGCATT  
 TGGCGGACTACAAAGACCATGACGGTGATTATAAAGATCATGACATCGATTACAAGGATGA  
 CGATGACAAGTAAAGGCCGCGACTCTAGA

**pcDNA3.1+/mt-uORF nLuc (Sacl/Xbal)**

GAGCTCTCTGGCTAACTAGAGAACCCACTGCTTACTGGCTTATCGAAATTAATACGACTCA  
 CTATAGGCaacaacaacaacaacaacaacaacaacaacaacaacaacaacaacaacaacaaca  
 aacacc<sup>aa</sup>agtcacc<sup>aa</sup>agtcacc<sup>aa</sup>agtc<sup>aa</sup>acaacaacaacaaca<sup>aa</sup>ATGGTCTTCACACTCGAAGATTTTCG  
 TTGGGGACTGGCGACAGACAGCCGGCTACAACCTGGACCAAGTCCTTGAACAGGGAGGT  
 GTGTCCAGTTTGTTCAGAATCTCGGGGTGTCCGTAACCTCCGATCCAAAGGATTGTCCTGA  
 GCGGTGAAAATGGGCTGAAGATCGACATCCATGTCATCATCCCGTATGAAGGTCTGAGCG  
 GCGACCAAATGGGCCAGATCGAAAAAATTTTTAAGGTGGTGTACCCTGTGGATGATCATCA  
 CTTTAAGGTGATCCTGCACTATGGCACACTGGTAATCGACGGGGTTACGCCGAACATGATC  
 GACTATTTCCGACGGCCGTATGAAGGCATCGCCGTGTTCGACGGCAAAAAGATCACTGTA  
 ACAGGGACCCTGTGGAACGGCAACAAAATTATCGACGAGCGCCTGATCAACCCCGACGGC  
 TCCCTGCTGTTCCGAGTAACCATCAACGGAGTGACCGGCTGGCGGCTGTGCGAACGCATT

CTGGCGGACTACAAAGACCATGACGGTGATTATAAAGATCATGACATCGATTACAAGGATG  
ACGATGACAAGTAAAGGCCGCGACTCTAGA

**pcDNA3.1+/10AUG uORF nLuc (Sacl/Xbal)**

GAGCTCTCTGGCTAACTAGAGAACCCACTGCTTACTGGCTTATCGAAATTAATACGACTCA  
CTATAGGcaacaacaacaacaacaacaacaacaacaacaacaacaacaacaacaacaacaac  
aacaccatgatgatgatgatgatgatgatgataacaacaacaacaacaATGGTCTTCACACTCGAAGATT  
TCGTTGGGGACTGGCGACAGACAGCCGGCTACAACCTGGACCAAGTCCTTGAACAGGGA  
GGTGTGTCCAGTTTGTTCAGAATCTCGGGGTGTCCGTAACCTCCGATCCAAAGGATTGTCC  
TGAGCGGTGAAAATGGGCTGAAGATCGACATCCATGTCATCATCCCCTATGAAGGTCTGA  
GCGGCGACCAAATGGGCCAGATCGAAAAATTTTTAAGGTGGTGTACCCTGTGGATGATCA  
TCACTTTAAGGTGATCCTGCACTATGGCACACTGGTAATCGACGGGGTTACGCCGAACATG  
ATCGACTATTTTCGGACGGCCGTATGAAGGCATCGCCGTGTTTCGACGGCAAAAAGATCACT  
GTAACAGGGACCCTGTGGAACGGCAACAAAATTATCGACGAGCGCCTGATCAACCCCGAC  
GGCTCCCTGCTGTTCCGAGTAACCATCAACGGAGTGACCGGCTGGCGGCTGTGCGAACG  
CATTCTGGCGGACTACAAAGACCATGACGGTGATTATAAAGATCATGACATCGATTACAAG  
GATGACGATGACAAGTAAAGGCCGCGACTCTAGA

**pcDNA3.1+/10AAA mt-uORF nLuc (Sacl/Xbal)**

GAGCTCTCTGGCTAACTAGAGAACCCACTGCTTACTGGCTTATCGAAATTAATACGACTCA  
CTATAGGcaacaacaacaacaacaacaacaacaacaacaacaacaacaacaacaacaacaac  
aacaccaaaaaaaaaaaaaaaaaaaaaaaaaaaaataacaacaacaacaacaATGGTCTTCACACTCGAA  
GATTCGTTGGGGACTGGCGACAGACAGCCGGCTACAACCTGGACCAAGTCCTTGAACAG  
GGAGGTGTGTCCAGTTTGTTCAGAATCTCGGGGTGTCCGTAACCTCCGATCCAAAGGATTG  
TCCTGAGCGGTGAAAATGGGCTGAAGATCGACATCCATGTCATCATCCCCTATGAAGGTCT  
GAGCGGCGACCAAATGGGCCAGATCGAAAAATTTTTAAGGTGGTGTACCCTGTGGATGA  
TCATCACTTTAAGGTGATCCTGCACTATGGCACACTGGTAATCGACGGGGTTACGCCGAAC  
ATGATCGACTATTTTCGGACGGCCGTATGAAGGCATCGCCGTGTTTCGACGGCAAAAAGATC  
ACTGTAACAGGGACCCTGTGGAACGGCAACAAAATTATCGACGAGCGCCTGATCAACCCCG  
GACGGCTCCCTGCTGTTCCGAGTAACCATCAACGGAGTGACCGGCTGGCGGCTGTGCGA  
ACGCATTCTGGCGGACTACAAAGACCATGACGGTGATTATAAAGATCATGACATCGATTAC  
AAGGATGACGATGACAAGTAAAGGCCGCGACTCTAGA

**pcDNA3.1+/large uORF nLuc (Sacl/Xbal)**

GAGCTCTCTGGCTAACTAGAGAACCCACTGCTTACTGGCTTATCGAAATTAATACGACTCA  
CTATAGGcaacaacaacaacaacaacaacaacaacaacaacaacaacaacaacaacaacaac  
aacaccatggtcaccatggtcaccatggtcGCAGAAATCGGTACTGGCTTTCATTTCGACCCCCATTATG  
TGGAAGTCCTGGGCGAGCGCATGCACTACGTCGATGTTGGTCCGCGCGATGGCACCCCT  
GTGCTGTTCTGCACGGTAACCCGACCTCCTCCTACGTGTGGCGCAACATCATCCCGCAT  
GTTGCACCGACCCATCGCTGCATTGCTCCAGACCTGATCGGTATGGGCAAATCCGACAAA  
CCAGACCTGGGTTATTTCTTCGACGACCACGTCGCTTCATGGATGCCTTCATCGAAGCCC  
TGGGTCTGGAAGAGGTCGTCCTGGTCATTCACGACTGGGGCTCCGCTCTGGGTTTCCACT  
GGGCAAGCGCAATCCAGAGCGCGTCAAAGGTATTGCATTTATGGAGTTCATCCGCCCTA  
TCCCGACCTGGGACGAATGGCCAGAATTTGCCCGCGAGACCTTCAGGCCTTCGCGACCA  
CCGACGTCGGCCGCAAGCTGATCATCGATCAGAACGTTTTTATCGAGGGTACGCTGCCGA  
TGGGTGTCGTCGCGCCGCTGACTGAAGTCGAGATGGACCATTACCGCGAGCCGTTCTCTGA  
ATCCTGTTGACCGCGAGCCACTGTGGCGCTTCCCAAACGAGCTGCCAATCGCCGGTGAGC  
CAGCGAACATCGTCGCGCTGGTCAAGAATACATGGACTGGCTGCACCAGTCCCCTGTCC  
CGAAGCTGCTGTTCTGGGGCACCCAGGCGTTCTGATCCCACCGGCCGAAGCCGCTCGC  
CTGGCCAAAAGCCTGCCTAACTGCAAGGCTGTGGACATCGGCCCGGGTCTGAATCTGCTG  
CAAGAAGACAACCCGACCTGATCGGCAGCGAGATCGCGCGCTGGCTGTGACGCTCGA



GATTTCCGGCCACCGGTGCGAACCTTGGGTACCGCGGGCCCGGGATCCACCGGTGCGAA  
 CCTTGGTGAGCAAGGGCGAGGAGCTGTTACCGGGGTGGTGCCATCCTGGTCGAGCTG  
 GACGGCGACGTAAACGGCCACAAGTTCAGCGTGTCCGGCGAGGGCGAGGGCGATGCCAC  
 CTACGGCAAGCTGACCCTGAAGTTCATCTGCACCACCGGCAAGCTGCCCGTGCCCTGGCC  
 CACCCTCGTGACCACCCTGACCTACGGCGTGCAGTGCTTCAGCCGCTACCCCGACCACAT  
 GAAGCAGCACGACTTCTTCAAGTCCGCCATGCCCGAAGGCTACGTCCAGGAGCGCACCAT  
 CTTCTTCAAGGACGACGGCAACTACAAGACCCGCGCCGAGGTGAAGTTCGAGGGCGACA  
 CCCTGGTGAACCGCATCGAGCTGAAGGGCATCGACTTCAAGGAGGACGGCAACATCCTG  
 GGGCACAAGCTGGAGTACAACAGCCACAACGTCTATATCATGGCCGACAAGCAG  
 AAGAACGGCATCAAGGTGAACCTCAAGATCCGCCACAACATCGAGGACGGCAGCGTGCAG  
 CTCGCCGACCACTACCAGCAGAACACCCCATCGGCCGACGGCCCGTGCTGCTGCCCGA  
 CAACCACTACCTGAGCACCCAGTCCGCCCTGAGCAAAGACCCCAACGAGAAGCGCGATCA  
 CATGGTCTGCTGGAGTTCGTGACCGCCGCGGGATCACTCTCGGCATGGACGAGCTGTA  
 CAAG<sup>taa</sup>acaacaacaacaaca<sup>aa</sup>ATGGTCTTCACACTCGAAGATTTGTTGGGGACTGGCGACAG  
 ACAGCCGGCTACAACCTGGACCAAGTCTTGAACAGGGAGGTGTGTCCAGTTTGTTCAG  
 AATCTCGGGGTGTCCGTA<sup>ACT</sup>CCGATCCA<sup>AAGG</sup>ATTGTCCTGAGCGGTGAAAATGGGCTG  
 AAGATCGACATCCATGTCATCATCCCCTATGAAGGTCTGAGCGGCGACCAAATGGGCCAG  
 ATCGAAAAAATTTTTAAGGTGGTGTACCCTGTGGATGATCATCACTTTAAGGTGATCCTGCA  
 CTATGGCACACTGGTAATCGACGGGGTTACGCCGAACATGATCGACTATTTCCGACGGCC  
 GTATGAAGGCATCGCCGTGTTCCGACGGCAAAAAGATCACTGTAACAGGGACCCTGTGGAA  
 CGGCAACAAAATTATCGACGAGCGCCTGATCAACCCCGACGGCTCCCTGCTGTTCCGAGT  
 AACCATCAACGGAGTGACCGGCTGGCGGCTGTGCGAACGCATTCTGGCGGACTACAAAGA  
 CCATGACGGTGATTATAAAGATCATGACATCGATTACAAGGATGACGATGACAAGTAA<sup>GGC</sup>  
 CGCGACTCTAGA

**pcDNA3.1+/uORF nLuc (Sacl/XbaI)\_115 nt spacer**

GAGCTCTTGCTAACTAGAGAACCCACTGCTTACTGGCTTATCGAAATTAATACGACTCA  
 CTATAGGcaacaacaacaacaacaacaacaacaacaacaacaacaacaacaacaacaacaaca  
 aacacc<sup>atg</sup>gtcacc<sup>atg</sup>gtcacc<sup>atg</sup>gtc<sup>taa</sup>acaacaacaacaacaacaacaacaacaacaacaacaacaacaacaacaacaaca  
 caacaacaacaacaacaacaacaacaacaacaacaacaacaacaacaacaacaacaacaacaaca<sup>aa</sup>ATGGTCTTCA  
 CACTCGAAGATTTGTTGGGGACTGGCGACAGACGCCGGCTACAACCTGGACCAAGTCC  
 TTGAACAGGGAGGTGTGTCCAGTTTGTTCAGAATCTCGGGGTGTCCGTA<sup>ACT</sup>CCGATCCA  
 AAGGATTGTCCTGAGCGGTGAAAATGGGCTGAAGATCGACATCCATGTCATCATCCCCTAT  
 GAAGGTCTGAGCGGCGACCAAATGGGCCAGATCGAAAAAATTTTTAAGGTGGTGTACCCT  
 GTGGATGATCATCACTTTAAGGTGATCCTGCACTATGGCACACTGGTAATCGACGGGGTTA  
 CGCCGAACATGATCGACTATTTCCGACGGCCGTATGAAGGCATCGCCGTGTTCCGACGGCA  
 AAAAGATCACTGTAACAGGGACCCTGTGGAACGGCAACAAAATTATCGACGAGCGCCTGA  
 TCAACCCCGACGGCTCCCTGCTGTTCCGAGTAACCATCAACGGAGTGACCGGCTGGCGG  
 CTGTGCGAACGCATTCTGGCGGACTACAAAGACCATGACGGTGATTATAAAGATCATGACA  
 TCGATTACAAGGATGACGATGACAAGTAA<sup>GGCCGCGACTCTAGA</sup>

**pcDNA3.1+/large uORF nLuc (Sacl/XbaI)\_115 nt spacer**

GAGCTCTTGCTAACTAGAGAACCCACTGCTTACTGGCTTATCGAAATTAATACGACTCA  
 CTATAGGcaacaacaacaacaacaacaacaacaacaacaacaacaacaacaacaacaacaacaac  
 aacacc<sup>atg</sup>gtcacc<sup>atg</sup>gtcacc<sup>atg</sup>gtc<sup>GCAGAAATCGGTA</sup>CTGGCTTTCCATTCGACCCCAATTATG  
 TGGAAGTCTTGGGCGAGCGCATGCACTACGTGATGTTGGTCCGCGCGATGGCACCCCT  
 GTGCTGTTCTGCACGGTAACCCGACCTCCTCCTACGTGTGGCGCAACATCATCCCGCAT  
 GTTGCACCGACCCATCGCTGCATTGCTCCAGACCTGATCGGTATGGGCAAATCCGACAAA  
 CCAGACCTGGGTATTTCTTCCGACGACCAGTCCGCTTCATGGATGCCTTCATCGAAGCCC  
 TGGGTCTGGAAGAGGTGTCCTGGTCATTACGACTGGGGCTCCGCTCTGGGTTTCCACT  
 GGGCCAAGCGCAATCCAGAGCGCGTCAAAGGTATTGCATTATGGAGTTCATCCGCCCTA

TCCCGACCTGGGACGAATGGCCAGAATTTGCCCGGAGACCTTCCAGGCCTTCCGCACCA  
 CCGACGTGGCCGCAAGCTGATCATCGATCAGAACGTTTTATCGAGGGTACGCTGCCGA  
 TGGGTGTCGTCCGCCGCTGACTGAAGTCGAGATGGACCATTACCGCGAGCCGTTCTGAC  
 ATCCTGTTGACCGCGAGCCACTGTGGCGCTTCCCAAACGAGCTGCCAATCGCCGGTGAGC  
 CAGCGAACATCGTCGCGCTGGTGAAGAATACATGGACTGGCTGCACCAGTCCCCTGTCC  
 CGAAGCTGCTGTTCTGGGGCACCCAGGCCTTCTGATCCACCGGCCGAAGCCGCTCGC  
 CTGGCCAAAAGCCTGCCTAACTGCAAGGCTGTGGACATCGGCCCGGGTCTGAATCTGCTG  
 CAAGAAGACAACCCGGACCTGATCGGCAGCGAGATCGCGCGCTGGCTGTGACGCTCGA  
 GATTCGGCCACCGGTCGCAACCTTGGGTACCGCGGGCCCGGGATCCACCGGTCGCAA  
 CCTTGGTGAGCAAGGGCGAGGAGCTGTTACCGGGGTGGTGCCATCCTGGTCGAGCTG  
 GACGGCGACGTAAACGGCCACAAGTTCAGCGTGTCCGGCGAGGGCGAGGGCGATGCCAC  
 CTACGGCAAGCTGACCCTGAAGTTCATCTGCACCACCGGCAAGCTGCCCGTGCCCTGGCC  
 CACCCTCGTGACCACCCTGACCTACGGCGTGCAGTGCTTCAGCCGCTACCCCGACCAT  
 GAAGCAGCACGACTTCTCAAGTCCGCCATGCCGAAGGCTACGTCCAGGAGCGCACCAT  
 CTTCTCAAGGACGACGGCAACTACAAGACCCGCGCCGAGGTGAAGTTCGAGGGGCGACA  
 CCCTGGTGAACCGCATCGAGCTGAAGGGCATCGACTTCAAGGAGGACGGCAACATCCTG  
 GGGCACAAGCTGGAGTACAACAGCCACAACGTCTATATCATGGCCGACAAGCAG  
 AAGAACGGCATCAAGGTGAACTTCAAGATCCGCCACAACATCGAGGACGGCAGCGTGCAG  
 CTCGCCGACCACTACCAGCAGAACACCCCCATCGGCCGACGGCCCCGTGCTGCTGCCCGA  
 CAACCACTACCTGAGCACCCAGTCCGCCCTGAGCAAAGACCCCAACGAGAAGCGCGATCA  
 CATGGTCTGCTGGAGTTCGTGACCGCCGCCGGGATCACTCTCGGCATGGACGAGCTGTA  
 CAAGtaacaacaacaacaacaacaacaacaacaacaacaacaacaacaacaacaacaacaaca  
 aacaacaacaacaacaacaacaacaacaacaacaacaacaacaacaacaacaacaacaacaaca  
 aacaacaacaacaacaacaacaacaacaacaacaacaacaacaacaacaacaacaacaacaaca  
 ATGGTCTTCACACTCGAAGATTTGCTT  
 GGGACTGGCGACAGACGCCGGCTACAACCTGGACCAAGTCCTTGAACAGGGAGGTGT  
 GTCCAGTTTGTTCAGAATCTCGGGGTGTCCGTAACCTCCGATCCAAAGGATTGTCCTGAGC  
 GGTGAAAATGGGCTGAAGATCGACATCCATGTATCATCCCGTATGAAGGTCTGAGCGGC  
 GACCAAATGGGCCAGATCGAAAAATTTTTAAGGTGGTGTACCCTGTGGATGATCATCACT  
 TTAAGGTGATCCTGCACTATGGCACACTGGTAATCGACGGGGTTACGCCGAACATGATCG  
 ACTATTCGGACGGCCGTATGAAGGCATCGCCGTGTTTCGACGGCAAAAAGATCACTGTAA  
 CAGGGACCCTGTGGAACGGCAACAAAATTATCGACGAGCGCCTGATCAACCCCGACGGCT  
 CCCTGCTGTTCCGAGTAACCATCAACGGAGTGACCGGCTGGCGGGCTGTGCGAACGCATTC  
 TGCGGACTACAAAGACCATGACGGTGATTATAAAGATCATGACATCGATTACAAGGATGA  
 CGATGACAAGTAAAGGCCGCGACTCTAGA

**pcDNA3.1+/truncated uORF nLuc (SacI/XbaI)**

GAGCTCTCTGGCTAACTAGAGAACCCACTGCTTACTGGCTTATCGAAATTAATACGACTCA  
 CTATAGGcaacaacaacaacaacaacaacaacaacaacaacaacaacaacaacaacaacaacaac  
 aacaccatggtcaccatggtcaccatggtcGCAGAAATCGGTAAGTGGCTTTCCAGGCATGGACGAGCTG  
 TACAAGtaacaacaacaacaacaacaacaacaacaacaacaacaacaacaacaacaacaacaaca  
 ATGGTCTTCACACTCGAAGATTTGCTTGGGGACTGGCGAC  
 AGACAGCCGGCTACAACCTGGACCAAGTCCTTGAACAGGGAGGTGTGTCCAGTTTGTTC  
 AGAATCTCGGGGTGTCCGTAACCTCCGATCCAAAGGATTGTCCTGAGCGGTGAAAATGGGC  
 TGAAGATCGACATCCATGTATCATCCCGTATGAAGGTCTGAGCGGCGACCAAATGGGCC  
 AGATCGAAAAATTTTTAAGGTGGTGTACCCTGTGGATGATCATCACTTTAAGGTGATCCTG  
 CACTATGGCACACTGGTAATCGACGGGGTTACGCCGAACATGATCGACTATTCGGACGG  
 CCGTATGAAGGCATCGCCGTGTTTCGACGGCAAAAAGATCACTGTAACAGGGACCCTGTGG  
 AACGGCAACAAAATTATCGACGAGCGCCTGATCAACCCCGACGGCTCCCTGCTGTTCCGA  
 GTAACCATCAACGGAGTGACCGGCTGGCGGGCTGTGCGAACGCATTCTGGCGGACTACAAA  
 GACCATGACGGTGATTATAAAGATCATGACATCGATTACAAGGATGACGATGACAAGTAA  
 GCCGCGACTCTAGA

**pcDNA3.1+/10AUG large uORF nLuc (SacI/XbaI)**

GAGCTCTCTGGCTAACTAGAGAACCCACTGCTTACTGGCTTATCGAAATTAATACGACTCA  
 CTATAGGcaacaacaacaacaacaacaacaacaacaacaacaacaacaacaacaacaacaacaac  
 aacaccatgatgatgatgatgatgatgatgatgatgGCAGAAATCGGTACTGGCTTTCCATTCGACCCCAT  
 TATGTGGAAGTCCTGGGCGAGCGCATGCACTACGTCGATGTTGGTCCGCGCGATGGCACC  
 CCTGTGCTGTTCTGCACGGTAACCCGACCTCCTCCTACGTGTGGCGCAACATCATCCG  
 CATGTTGCACCGACCCATCGCTGCATTGCTCCAGACCTGATCGGTATGGGCAAATCCGAC  
 AAACCAGACCTGGGTTATTTCTTCGACGACCACGTCCGCTTCATGGATGCCTTCATCGAAG  
 CCCTGGGTCTGGAAGAGGTCGTCCTGGTCATTCACGACTGGGGCTCCGCTCTGGGTTTCC  
 ACTGGGCCAAGCGCAATCCAGAGCGCGTCAAAGGTATTGCATTTATGGAGTTCATCCGCC  
 CTATCCCGACCTGGGACGAATGGCCAGAATTTGCCCGCGAGACCTTCAGGCCTTCGCA  
 CCACCGACGTGCGCCGCAAGCTGATCATCGATCAGAACGTTTTATCGAGGGTACGCTGC  
 CGATGGGTGTCGTCGCGCCGCTGACTGAAGTCGAGATGGACCATTACCGCGAGCCGTTCC  
 TGAATCCTGTTGACCGCGAGCCACTGTGGCGCTTCCCAAACGAGCTGCCAATCGCCGGTG  
 AGCCAGCGAACATCGTCGCGCTGGTCAAGAATACATGGACTGGCTGCACCAGTCCCTGT  
 TCCCGAAGCTGCTGTTCTGGGGCACCCAGGCCTTCTGATCCACCGGCCGAAGCCGCT  
 CGCCTGGCCAAAAGCCTGCCTAACTGCAAGGCTGTGGACATCGGCCCGGGTCTGAATCTG  
 CTGCAAGAAGACAACCCGGACCTGATCGGCAGCGAGATCGCGCGCTGGCTGTGACGCT  
 CGAGATTTCCGGCCACCGGTGCAACCTTGGGTACCGCGGGCCCGGGATCCACCGGTCC  
 CAACCTTGGTGAGCAAGGGCGAGGAGCTGTTACCGGGGTGGTGCCATCCTGGTCGAG  
 CTGGACGGCGACGTAACGGCCACAAGTTCAGCGTGTCCGGCGAGGGCGAGGGCGATGC  
 CACCTACGGCAAGCTGACCCTGAAGTTCATCTGCACCACCGGCAAGCTGCCCGTGCCCTG  
 GCCACCCTCGTGACCACCCTGACCTACGGCGTGCAGTGCTTCAGCCGCTACCCCGACCA  
 CATGAAGCAGCACGACTTCTTCAAGTCCGCCATGCCCGAAGGCTACGTCCAGGAGCGCAC  
 CATCTTCTTCAAGGACGACGGCAACTACAAGACCCGCGCCGAGGTGAAGTTCGAGGGCGA  
 CACCCTGGTGAACCGCATCGAGCTGAAGGGCATCGACTTCAAGGAGGACGGCAACATCCT  
 GGGGCACAAGCTGGAGTACAACACTACAACAGCCACAACGTCTATATCATGGCCGACAAGCA  
 GAAGAACGGCATCAAGGTGAACCTTCAAGATCCGCCACAACATCGAGGACGGCAGCGTGCA  
 GCTCGCCGACCACTACCAGCAGAACACCCCATCGGCGACGGCCCGCTGCTGCTGCCCG  
 ACAACCACTACCTGAGCACCCAGTCCGCCCTGAGCAAAGACCCCAACGAGAAGCGCGATC  
 ACATGGTCTCTGCTGGAGTTCGTGACCGCCGCGGGGATCACTCTCGGCATGGACGAGCTGT  
 ACAAGtaacaacaacaacaacaataTGGTCTTCACACTCGAAGATTTGTTGGGGACTGGCGACA  
 GACAGCCGGCTACAACCTGGACCAAGTCTTGAACAGGGAGGTGTGTCCAGTTTGTTC  
 GAATCTCGGGGTGTCCGTAACCTCCGATCCAAAGGATTGTCTGAGCGGTGAAAATGGGCT  
 GAAGATCGACATCCATGTATCATCCCGTATGAAGGTCTGAGCGGCGACCAAATGGGCCA  
 GATCGAAAAAATTTTAAAGGTGGTGTACCCTGTGGATGATCATCACTTTAAGGTGATCCTGC  
 ACTATGGCACACTGGTAATCGACGGGGTTACGCCGAACATGATCGACTATTTCCGACGGC  
 CGTATGAAGGCATCGCCGTGTTGACGGCAAAAAGATCACTGTAACAGGGACCCTGTGGA  
 ACGGCAACAAAATTATCGACGAGCGCCTGATCAACCCCGACGGCTCCCTGCTGTTCCGAG  
 TAACCATCAACGGAGTGACCGGCTGGCGGCTGTGCGAACGCATTCTGGCGGACTACAAAG  
 ACCATGACGGTGATTATAAAGATCATGACATCGATTACAAGGATGACGATGACAAGTAAGG  
 CCGCGACTCTAGA

**pcDNA3.1+/10AUG truncated uORF nLuc (Sacl/XbaI)**

GAGCTCTCTGGCTAACTAGAGAACCCACTGCTTACTGGCTTATCGAAATTAATACGACTCA  
 CTATAGGcaacaacaacaacaacaacaacaacaacaacaacaacaacaacaacaacaacaacaac  
 aacaccatgatgatgatgatgatgatgatgatgatgGCAGAAATCGGTACTGGCTTTCCAGGCATGGACGAG  
 CTGTACAAGtaacaacaacaacaacaataTGGTCTTCACACTCGAAGATTTGTTGGGGACTGGC  
 GACAGACAGCCGGCTACAACCTGGACCAAGTCTTGAACAGGGAGGTGTGTCCAGTTTGT  
 TTCAGAATCTCGGGGTGTCCGTAACCTCCGATCCAAAGGATTGTCTGAGCGGTGAAAATG  
 GGCTGAAGATCGACATCCATGTATCATCCCGTATGAAGGTCTGAGCGGCGACCAAATGG  
 GCCAGATCGAAAAAATTTTAAAGGTGGTGTACCCTGTGGATGATCATCACTTTAAGGTGATC

CTGCACTATGGCACACTGGTAATCGACGGGGTTACGCCGAACATGATCGACTATTTTCGGA  
 CGGCCGTATGAAGGCATCGCCGTGTTTCGACGGCAAAAAGATCACTGTAACAGGGACCCTG  
 TGGAACGGCAACAAAATTATCGACGAGCGCCTGATCAACCCCGACGGCTCCCTGCTGTTG  
 CGAGTAACCATCAACGGAGTGACCGGCTGGCGGCTGTGCGAACGCATTCTGGCGGACTA  
 CAAAGACCATGACGGTGATTATAAAGATCATGACATCGATTACAAGGATGACGATGACAAG  
 TAAAGGCCGCGACTCTAGA

**pcDNA3.1+large uORF (FFLuc) nLuc (Sacl/Xbal)**

GAGCTCTCTGGCTAACTAGAGAACCCACTGCTTACTGGCTTATCGAAATTAATACGACTCA  
 CTATAGGcaacaacaacaacaacaacaacaacaacaacaacaacaacaacaacaacaacaaca  
 aacaccatggtcaccatggtcaccatggtcGAAGATGCCAAAAACATTAAGAAGGGCCAGCGCCATTCT  
 ACCCACTCGAAGACGGGACCGCCGGCGAGCAGCTGCACAAAGCCATGAAGCGCTACGCC  
 CTGGTGCCCGGCACCATCGCCTTACCAGCGCACATATCGAGGTGGACATTACCTACGCC  
 GAGTACTTCGAGATGAGCGTTCGGCTGGCAGAAGCTATGAAGCGCTATGGGCTGAATACA  
 AACCATCGGATCGTGGTGTGCAGCGAGAATAGCTTGCAGTTCTTCATGCCCGTGTGGGT  
 GCCCTGTTTCATCGGTGTGGCTGTGGCCCCAGCTAACGACATCTACAACGAGCGCGAGCTG  
 CTGAACAGCATGGGCATCAGCCAGCCACCGTCGTATTTCGTGAGCAAGAAAGGGCTGCAA  
 AAGATCCTCAACGTGCAAAGAAGCTACCGATCATAAAAAGATCATCATCATGGATAGCA  
 AGACCGACTACCAGGGCTTCCAAAGCATGTACACCTTCGTGACTTCCCATTGCCACCCGG  
 CTTCAACGAGTACGACTTCGTGCCCGAGAGCTTCGACCGGGACAAAACCATCGCCCTGAT  
 CATGAACAGTAGTGGCAGTACCGGATTGCCAAGGGCGTAGCCCTACCGCACCGCACCG  
 CTTGTGTCCGATTCAGTCATGCCCGGACCCCATCTTCGGCAACCAGATCATCCCCGACA  
 CCGCTATCCTCAGCGTGGTGCCATTTACCACGGCTTCGGCATGTTACCACGCTGGGCT  
 ACTTGATCTGCGGCTTTCGGGTCGTGCTCATGTACCGCTTCGAGGAGGAGCTATTCTTGC  
 GCAGCTTGCAAGACTATAAGATTCAATCTGCCCTGCTGGTGCCCACTATTTAGCTTCTTC  
 GCTAAGAGCACTCTCATCGACAAGTACGACCTAAGCAACTTGCACGAGATCGCCAGCGGC  
 GGGCGCCGCTCAGCAAGGAGGTAGGTGAGGCCGTGGCAAACGCTTCCACCTACCAGG  
 CATCCGCCAGGGCTACGGCCTGACAGAAACAACCAGCGCCATTCTGATCACCCCCGAAGG  
 GGACGACAAGCCTGGCGCAGTAGGCAAGGTGGTGCCCTTCTTCGAGGCTAAGGTGGTGG  
 ACTTGACACCGGTAAGACACTGGGTGTGAACCAGCGCGGCGAGCTGTGCGTCCGTGGC  
 CCCATGATCATGAGCGGCTACGTTAACAACCCCGAGGCTACAAACGCTCTCATCGACAAG  
 GACGGCTGGCTGCACAGCGGCGACATCGCCTACTGGGACGAGGACGAGCACTTCTTCAT  
 CGTGGACCGGCTGAAGAGCCTGATCAAATAAAGGGCTACCAGGTAGCCCCAGCCGAACT  
 GGAGAGCATCCTGCTGCAACACCCCAACATCTTCGACGCCGGGGTCCCGGCCTGCCCG  
 ACGACGATGCCGGCGAGCTGCCCGCCGAGTCGTGCTGCTGGAACACGGTAAACCATG  
 ACCGAGAAGGAGATCGTGGACTATGTGGCCAGCCAGGTTACAACCGCCAAGAAGCTGCG  
 CGGTGGTGTGTTGTTGTTGTTGTTGTTGTTGTTGTTGTTGTTGTTGTTGTTGTTGTTGTT  
 GCAAGATCCGCGAGATTCTCATTAAAGGCCAAGAAGGGCGGCAAGATCGCCGTGGGCAAAC  
 CGATTCCGAACCCGCTGCTGGGCCTGGATAGCACCTaaacaacaacaacaacaATGGTCTTCAC  
 ACTCGAAGATTTTCGTTGGGGACTGGCGACAGACAGCCGGCTACAACCTGGACCAAGTCTC  
 TGAACAGGGAGGTGTGTCCAGTTTGTTCAGAATCTCGGGGTGTCCGTAACCTCCGATCCAA  
 AGGATTGTCCTGAGCGGTGAAAATGGGCTGAAGATCGACATCCATGTCATCATCCCGTATG  
 AAGGTCTGAGCGGCGACCAAAATGGGCCAGATCGAAAAAATTTTAAGGTGGTGTACCCTGT  
 GGATGATCATCACTTTAAGGTGATCCTGCACTATGGCACACTGGTAATCGACGGGGTTACG  
 CCGAACATGATCGACTATTTTCGACGGCCGTATGAAGGCATCGCCGTGTTTCGACGGCAA  
 AAGATCACTGTAACAGGGACCCTGTGGAACGGCAACAAAATTATCGACGAGCGCCTGATC  
 AACCCCGACGGCTCCCTGCTGTTCCGAGTAACCATCAACGGAGTGACCGGCTGGCGGCT  
 GTGCGAACGCATTCTGGCGGACTACAAAGACCATGACGGTGATTATAAAGATCATGACATC  
 GATTACAAGGATGACGATGACAAGTAAAGGCCGCGACTCTAGA

**pcDNA3.1+/truncated uORF (FFLuc) nLuc (Sacl/Xbal)**

GAGCTCTCTGGCTAACTAGAGAACCCACTGCTTACTGGCTTATCGAAATTAATACGACTCA  
CTATAGGcaacaacaacaacaacaacaacaacaacaacaacaacaacaacaacaacaacaacaaca  
aacaccatggtcaccatggtcaccatggtcGAAGATGCCAAAAACATTAAGAAGCTGCTGGGCCTGGATA  
GCACCtaaacacaacaacaacaacaATGGTCTTCACACTCGAAGATTTTCGTTGGGGACTGGCGACA  
GACAGCCGGCTACAACCTGGACCAAGTCCTTGAACAGGGAGGTGTGTCCAGTTTGTTCAT  
GAATCTCGGGGTGTCCGTAACCTCCGATCCAAAGGATTGTCTGAGCGGTGAAAATGGGCT  
GAAGATCGACATCCATGTCATCATCCCGTATGAAGGTCTGAGCGGCGACCAAATGGGCCA  
GATCGAAAAAATTTTTAAGGTGGTGTACCCTGTGGATGATCATCACTTTAAGGTGATCCTGC  
ACTATGGCACACTGGTAATCGACGGGGTTACGCCGAACATGATCGACTATTTCCGGACGGC  
CGTATGAAGGCATCGCCGTGTTCCGACGGCAAAAAGATCACTGTAACAGGGACCCTGTGGA  
ACGGCAACAAAATTATCGACGAGCGCTGATCAACCCCGACGGCTCCCTGCTGTTCCGAG  
TAACCATCAACGGAGTGACCGGCTGGCGGCTGTGCGAACGCATTCTGGCGGACTACAAAG  
ACCATGACGGTGATTATAAAGATCATGACATCGATTACAAGGATGACGATGACAAGTAAAGG  
CCGCGACTCTAGA

**pcDNA3.1+/10AUG large uORF (FFLuc) nLuc (Sacl/XbaI)**

GAGCTCTCTGGCTAACTAGAGAACCCACTGCTTACTGGCTTATCGAAATTAATACGACTCA  
CTATAGGcaacaacaacaacaacaacaacaacaacaacaacaacaacaacaacaacaacaacaaca  
aacaccatgatgatgatgatgatgatgatgatgatgatGAAGATGCCAAAAACATTAAGAAGGGCCAGCGCCA  
TTCTACCCACTCGAAGACGGGACCGCCGGCGAGCAGCTGCACAAAGCCATGAAGCGCTA  
CGCCCTGGTGCCCGGACCATCGCCTTACCAGCGACATATCGAGGTGGACATTACCTA  
CGCCGAGTACTTCGAGATGAGCGTTCGGCTGGCAGAAGCTATGAAGCGCTATGGGCTGAA  
TACAAACCATCGGATCGTGGTGTGACGCGAGAATAGCTTGCAGTTCTTCATGCCCGTGTG  
GGTGCCCTGTTTCATCGGTGTGGCTGTGGCCCCAGCTAACGACATCTACAACGAGCGCGAG  
CTGCTGAACAGCATGGGCATCAGCCAGCCCACCGTCGTATTTCGTGAGCAAGAAAGGGCTG  
CAAAGATCCTCAACGTGCAAAAGAAGCTACCGATCATAAAAAGATCATCATCATGGATA  
GCAAGACCGACTACCAGGGCTTCAAAGCATGTACACCTTCGTGACTTCCCATTGCCACC  
CGGCTTCAACGAGTACGACTTCGTGCCGAGAGCTTCGACCGGGACAAAACCATCGCCCT  
GATCATGAACAGTAGTGCCAGTACCGGATTGCCCAAGGGCGTAGCCCTACCGCACCCGCAC  
CGCTTGTGTCCGATTACGTCATGCCCGGACCCCATCTTCGGCAACCAGATCATCCCCGA  
CACCGCTATCCTCAGCGTGGTGCCATTTACCACGGCTTCGGCATGTTACCCACGCTGGG  
CTACTTGATCTGCGGCTTTCGGGTCTGTCTCATGTACCGCTTCGAGGAGGAGCTATTCTTG  
CGCAGCTTGCAAGACTATAAGATTCAATCTGCCCTGCTGGTGCCCACTATTTAGCTTCTT  
CGCTAAGAGCACTCTCATCGACAAGTACGACCTAAGCAACTTGCACGAGATCGCCAGCGG  
CGGGGCGCCGCTCAGCAAGGAGGTAGGTGAGGCCGTGGCCAAACGCTTCCACCTACCAG  
GCATCCGCCAGGGCTACGGCCTGACAGAAACAACCAGCGCCATTCTGATCACCCCGAAG  
GGGACGACAAGCCTGGCGCAGTAGGCAAGGTGGTGCCCTTCTTCGAGGCTAAGGTGGTG  
GACTTGGACACCGGTAAGACACTGGGTGTGAACCAGCGCGGCGAGCTGTGCGTCCGTGG  
CCCCATGATCATGAGCGGCTACGTTAACAACCCCGAGGCTACAAACGCTCTCATCGACAA  
GGACGGCTGGCTGCACAGCGGCGACATCGCCTACTGGGACGAGGACGAGCACTTCTTCA  
TCGTGGACCGGCTGAAGAGCCTGATCAAATACAAGGGCTACCAGGTAGCCCCAGCCGAAC  
TGAGAGCATCCTGCTGCAACACCCCAACATCTTCGACGCCGGGGTCCCGGCCTGCC  
GACGACGATGCCGGCGAGCTGCCCGCCGAGTCGTCTGTGCTGGAACACGGTAAAACCAT  
GACCGAGAAGGAGATCGTGGACTATGTGGCCAGCCAGGTTACAACCGCCAAGAAGCTGC  
GCGGTGGTGTGTTGTTTCGTGGACGAGGTGCCTAAGGACTGACCGGCAAGTTGGACGCC  
CGCAAGATCCGCGAGATTCTCATTAAAGGCCAAGAAGGGCGGCAAGATCGCCGTGGGCAAA  
CCGATTCGAACCCGCTGCTGGGCCTGGATAGCACCTaacacaacaacaacaacaATGGTCTTCA  
CACTCGAAGATTTTCGTTGGGGACTGGCGACAGACAGCCGGCTACAACCTGGACCAAGTCC  
TTGAACAGGGAGGTGTGTCCAGTTTGTTCAGAATCTCGGGGTGTCCGTAACCTCCGATCCA  
AAGGATTGTCTGAGCGGTGAAAATGGGCTGAAGATCGACATCCATGTCATCATCCCGTAT  
GAAGGTCTGAGCGGCGACCAAATGGGCCAGATCGAAAAAATTTTTAAGGTGGTGTACCCT

GTGGATGATCATCACTTTAAGGTGATCCTGCACTATGGCACACTGGTAATCGACGGGGTTA  
 CGCCGAACATGATCGACTATTTTCGGACGGCCGTATGAAGGCATCGCCGTGTTTCGACGGCA  
 AAAAGATCACTGTAACAGGGACCCTGTGGAACGGCAACAAAATTATCGACGAGCGCCTGA  
 TCAACCCCGACGGCTCCCTGCTGTTCCGAGTAACCATCAACGGAGTGACCGGCTGGCGG  
 CTGTGCGAACGCATTCTGGCGGACTACAAAGACCATGACGGTGATTATAAAGATCATGACA  
 TCGATTACAAGGATGACGATGACAAGTAAAGGCCGCGACTCTAGA

**pcDNA3.1+/overlapping uORF nLuc (Sacl/Xbal)**

GAGCTCTCTGGCTAACTAGAGAACCCACTGCTTACTGGCTTATCGAAATTAATACGACTCA  
 CTATAGGcaacaacaacaacaacaacaacaacaacaacaacaacaacaacaacaacaacaaca  
 aacaccatggtcaccatggtcaccatggtcGTGAGCAAGGGCGAGGATGGTCTTCACACTCGAAGATTT  
 GTTGGGGACTGGCGACAGACAGCCGGCTACAACCTGGACCAAGTCCTTGAACAGGGAGG  
 TGTGTCCAGTTTGTTCAGAATCTCGGGGTGTCCGTAACCTCCGATCCAAAGGATTGTCTG  
 AGCGGTGAAAATGGGCTGAAGATCGACATCCATGTCATCATCCCGTATGAAGGTCTGAGC  
 GGCGACCAAATGGGCCAGATCGAAAAAATTTTAAGGTGGTGTACCCTGTGGATGATCATC  
 ACTTTAAGGTGATCCTGCACTATGGCACACTGGTAATCGACGGGGTTACGCCGAACATGAT  
 CGACTATTTTCGGACGGCCGTATGAAGGCATCGCCGTGTTTCGACGGCAAAAAGATCACTGT  
 AACAGGGACCCTGTGGAACGGCAACAAAATTATCGACGAGCGCCTGATCAACCCCGACGG  
 CTCCCTGCTGTTCCGAGTAACCATCAACGGAGTGACCGGCTGGCGGCTGTGCGAACGCAT  
 TCTGGCGGACTACAAAGACCATGACGGTGATTATAAAGATCATGACATCGATTACAAGGAT  
 GACGATGACAAGTAAAGGCCGCGACTCTAGA

**pcDNA3.1+/mt-overlapping uORF nLuc (Sacl/Xbal)**

GAGCTCTCTGGCTAACTAGAGAACCCACTGCTTACTGGCTTATCGAAATTAATACGACTCA  
 CTATAGGcaacaacaacaacaacaacaacaacaacaacaacaacaacaacaacaacaacaacaac  
 aacaccaaagtcaccaaagtcaccaaagtcGTGAGCAAGGGCGAGGATGGTCTTCACACTCGAAGATT  
 TCGTTGGGGACTGGCGACAGACAGCCGGCTACAACCTGGACCAAGTCCTTGAACAGGGA  
 GGTGTGTCCAGTTTGTTCAGAATCTCGGGGTGTCCGTAACCTCCGATCCAAAGGATTGTCC  
 TGAGCGGTGAAAATGGGCTGAAGATCGACATCCATGTCATCATCCCGTATGAAGGTCTGA  
 GCGGCGACCAAATGGGCCAGATCGAAAAAATTTTAAGGTGGTGTACCCTGTGGATGATCA  
 TCACTTTAAGGTGATCCTGCACTATGGCACACTGGTAATCGACGGGGTTACGCCGAACATG  
 ATCGACTATTTTCGGACGGCCGTATGAAGGCATCGCCGTGTTTCGACGGCAAAAAGATCACT  
 GTAACAGGGACCCTGTGGAACGGCAACAAAATTATCGACGAGCGCCTGATCAACCCCGAC  
 GGCTCCCTGCTGTTCCGAGTAACCATCAACGGAGTGACCGGCTGGCGGCTGTGCGAACG  
 CATTCTGGCGGACTACAAAGACCATGACGGTGATTATAAAGATCATGACATCGATTACAAG  
 GATGACGATGACAAGTAAAGGCCGCGACTCTAGA

**pcDNA3.1+/10AUG truncated uORF (FFLuc) nLuc (Sacl/Xbal)**

GAGCTCTCTGGCTAACTAGAGAACCCACTGCTTACTGGCTTATCGAAATTAATACGACTCA  
 CTATAGGcaacaacaacaacaacaacaacaacaacaacaacaacaacaacaacaacaacaacaac  
 aacaccatgatgatgatgatgatgatgatgatgatGAAGATGCCAAAAACATTAAGAAGCTGCTGGGCCTG  
 GATAGCACCtaaacacaacaacaacaacaaATGGTCTTCACACTCGAAGATTTTCGTTGGGGACTGGC  
 GACAGACAGCCGGCTACAACCTGGACCAAGTCCTTGAACAGGGAGGTGTGTCCAGTTTGT  
 TTCAGAATCTCGGGGTGTCCGTAACCTCCGATCCAAAGGATTGTCTGAGCGGTGAAAATG  
 GGCTGAAGATCGACATCCATGTCATCATCCCGTATGAAGGTCTGAGCGGCGACCAAATGG  
 GCCAGATCGAAAAAATTTTAAGGTGGTGTACCCTGTGGATGATCATCACTTTAAGGTGATC  
 CTGCACTATGGCACACTGGTAATCGACGGGGTTACGCCGAACATGATCGACTATTTTCGGA  
 CGGCCGTATGAAGGCATCGCCGTGTTTCGACGGCAAAAAGATCACTGTAACAGGGACCCTG  
 TGGAACGGCAACAAAATTATCGACGAGCGCCTGATCAACCCCGACGGCTCCCTGCTGTTCC  
 CGAGTAACCATCAACGGAGTGACCGGCTGGCGGCTGTGCGAACGCATTCTGGCGGACTA

CAAAGACCATGACGGTGATTATAAAGATCATGACATCGATTACAAGGATGACGATGACAAG  
TAAAGCCGCGACTCTAGA

**pcDNA3.1+/uORF-P2A-nLuc (Sacl/Xbal)**

GAGCTCTCTGGCTAACTAGAGAACCCACTGCTTACTGGCTTATCGAAATTAATACGACTCA  
CTATAGGcaacaacaacaacaacaacaacaacaacaacaacaacaacaacaacaacaacaacaac  
aacaccatggtcaccatggtcaccatggtcGGAAGCGGAGCTACTAACTTCAGCCTGCTGAAGCAGGCT  
GGAGACGTGGAGGAGAACCCTGGACCTATGGTCTTCACACTCGAAGATTTTCGTTGGGGAC  
TGCGGACAGACAGCCGGCTACAACCTGGACCAAGTCCTTGAACAGGGAGGTGTGTCCAGT  
TTGTTTCAGAATCTCGGGGTGTCCGTAACCTCCGATCCAAAGGATTGTCTGAGCGGTGAAA  
ATGGGCTGAAGATCGACATCCATGTCATCATCCCGTATGAAGGTCTGAGCGGCGACCAAA  
TGGGCCAGATCGAAAAATTTTAAAGGTGGTGTACCCTGTGGATGATCATCACTTTAAGGT  
GATCTGCACTATGGCACACTGGTAATCGACGGGGTTACGCCGAACATGATCGACTATTTCC  
GGACGGCCGTATGAAGGCATCGCCGTGTTGACGGCAAAAAGATCACTGTAACAGGGACC  
CTGTGGAACGGCAACAAAATTATCGACGAGCGCCTGATCAACCCCGACGGCTCCCTGCTG  
TTCCGAGTAACCATCAACGGAGTGACCGGCTGGCGGCTGTGCGAACGCATTCTGGCGGA  
CTACAAAGACCATGACGGTGATTATAAAGATCATGACATCGATTACAAGGATGACGATGAC  
AAGTAAAGCCGCGACTCTAGA

**pcDNA3.1+/large uORF-P2A-nLuc (Sacl/Xbal)**

GAGCTCTCTGGCTAACTAGAGAACCCACTGCTTACTGGCTTATCGAAATTAATACGACTCA  
CTATAGGcaacaacaacaacaacaacaacaacaacaacaacaacaacaacaacaacaacaacaac  
aacaccatggtcaccatggtcaccatggtcGCAGAAATCGGTACTGGCTTTCATTTCGACCCCATATG  
TGGAAGTCTGGGCGAGCGCATGCACTACGTCGATGTTGGTCCGCGGATGGCACCCCT  
GTGCTGTTCTGCACGGTAACCCGACCTCCTCCTACGTGTGGCGCAACATCATCCCGCAT  
GTTGCACCGACCCATCGCTGCATTGCTCCAGACCTGATCGGTATGGGCAAATCCGACAAA  
CCAGACCTGGGTTATTTCTTCGACGACCAGTCCGCTTCATGGATGCCTTCATCGAAGCCC  
TGGGTCTGGAAGAGGTGTCCTGGTCATTACGACTGGGGCTCCGCTCTGGGTTTCCACT  
GGGCCAAGCGCAATCCAGAGCGCGTCAAAGGTATTGCATTTATGGAGTTCATCCGCCCTA  
TCCCGACCTGGGACGAATGGCCAGAATTTGCCCGCGAGACCTTCCAGGCCTTCCGCACCA  
CCGACGTCCGGCCGAAGCTGATCATCGATCAGAACGTTTTATCGAGGGTACGCTGCCGA  
TGGGTGTCGTCGCCCGCTGACTGAAGTCGAGATGGACCATTACCGCGAGCCGTTCTCTGA  
ATCCTGTTGACCGCGAGCCACTGTGGCGCTTCCCAAACGAGCTGCCAATCGCCGGTGAGC  
CAGCGAACATCGTCGCGCTGGTGAAGAATACATGGACTGGCTGCACCAGTCCCCTGTCC  
CGAAGCTGCTGTTCTGGGGCACCCAGGCGTTCTGATCCACCGGCCGAAGCCGCTCGC  
CTGGCCAAAAGCCTGCCTAACTGCAAGGCTGTGGACATCGGCCCGGGTCTGAATCTGCTG  
CAAGAAGACAACCCGGACCTGATCGGCAGCGAGATCGCGCGCTGGCTGTGACGCTCGA  
GATTTCCGGCCACCGGTGCAACCTTGGGTACCGCGGGCCCGGATCCACCGGTGCGAA  
CCTTGGTGAGCAAGGGCGAGGAGCTGTTACCGGGGTGGTGCCCATCCTGGTCGAGCTG  
GACGGCGACGTAACGGCCACAAGTTCAGCGTGTCCGGCGAGGGCGAGGGCGATGCCAC  
CTACGGCAAGCTGACCCTGAAGTTCATCTGCACCACCGGCAAGCTGCCCGTGCCCTGGCC  
CACCTCGTGACCACCCTGACCTACGGCGTGCAGTGCTTCAGCCGCTACCCCGACCACAT  
GAAGCAGCACGACTTCTCAAGTCCGCCATGCCCGAAGGCTACGTCCAGGAGCGCACCAT  
CTTCTTCAAGGACGACGGCAACTACAAGACCCGCGCCGAGGTGAAGTTCGAGGGCGACA  
CCCTGGTGAACCGCATCGAGCTGAAGGGCATCGACTTCAAGGAGGACGGCAACATCCTG  
GGGCACAAGCTGGAGTACAACAGCCACAACGTCTATATCATGGCCGACAAGCAG  
AAGAACGGCATCAAGGTGAACCTCAAGATCCGCCACAACATCGAGGACGGCAGCGTGCAG  
CTCGCCGACCACTACCAGCAGAACACCCCATCGGCCAGCGCCCGTGTGCTGCCCCA  
CAACCACTACCTGAGCACCCAGTCCGCCCTGAGCAAAGACCCCAACGAGAAGCGCGATCA  
CATGGTCTGCTGGAGTTCGTGACCGCCCGGGATCACTCTCGGCATGGACGAGCTGTA  
CAAGGGAAGCGGAGCTACTAACTTCAGCCTGCTGAAGCAGGCTGGAGACGTGGAGGAGA

ACCCTGGACCTATGGTCTTCACACTCGAAGATTTTCGTTGGGGACTGGCGACAGACAGCCG  
 GCTACAACCTGGACCAAGTCCTTGAACAGGGAGGTGTGTCCAGTTTGTTCAGAATCTCGG  
 GGTGTCCGTAACCTCCGATCCAAAGGATTGTCCTGAGCGGTGAAAATGGGCTGAAGATCGA  
 CATCCATGTCATCATCCCCTATGAAGGTCTGAGCGGCGACCAAATGGGCCAGATCGAAAA  
 AATTTTAAGGTGGTGTACCCTGTGGATGATCATCACTTTAAGGTGATCCTGCACTATGGCA  
 CACTGGTAATCGACGGGGTTACGCCGAACATGATCGACTATTTTCGGACGGCCGTATGAAG  
 GCATCGCCGTGTTTCGACGGCAAAAAGATCACTGTAACAGGGACCCTGTGGAACGGCAACA  
 AAATTATCGACGAGCGCCTGATCAACCCCGACGGCTCCCTGCTGTTCCGAGTAACCATCAA  
 CGGAGTGACCGGCTGGCGGCTGTGCGAACGCATTCTGGCGGACTACAAAGACCATGACG  
 GTGATTATAAAGATCATGACATCGATTACAAGGATGACGATGACAAGTAAAGGCCGCGACTC  
 TAGA

**pcDNA3.1+/PV IRES no uORF nLuc (Sacl/Xbal)**

GAGCTCTCTGGCTAACTAGAGAACCCACTGCTTACTGGCTTATCGAAATTAATACGACTCA  
 CTATAGGGCTCGAGTTGGGGCGCGTGGTGGCGGCTGCAGCCGCCACCACGCGCCCCGG  
 aaaaaAAGCTTGGGCTGCAGGTCTTAAACAGCTCTGGGGTTGTACCCACCCCAGAGGCC  
 ACGTGGCGGCTAGTACTCCGGTATTGCGGTACCTTTGTACGCCTGTTTTATACTCCCTTCC  
 CCCGTAACCTAGAAGCACAATGTCCAAGTTCAATAGGAGGGGGTACAAACCAGTACCACCA  
 CGAACAAGCACTTCTGTTCCCCCGGTGAGGCTGTATAGGCTGTTTCCACGGCTAAAAGCG  
 GCTGATCCGTTATCCGCTCATGTACTTCGAGAAGCCTAGTATCACCTTGAATCTTCGATG  
 CGTTGCGCTCAACACTCAACCCAGAGTGTAGCTTAGGTCGATGAGTCTGGACGTTCTCA  
 CCGGCGACGGTGGTCCAGGCTGCGTTGGCGGCCTACCTGTGGCCCAAAGCCACAGGACG  
 CTAGTTGTGAACAAGGTGTGAAGAGCCTATTGAGCTACCTGAGAGTCTCCGGCCCCCTGA  
 ATGCGGCTAATCCTAACACGGAGCAGGCAGTGGCAATCCAGCGACCAGCCTGTCGTAAC  
 GCGCAAGTTCGTGGCGGAACCGACTACTTTGGGTGTCCGTGTTTCTTTTATTTTACAAT  
 GGCTGCTTATGGTGACAATCATTGATTGTTATCATAAAGCAAATTGGATTGGCCATCCGGT  
 GAGAATTTGATTATTAATAACTCTCTTGTGGATTGCTCCTTTGAAATCTTGTGCACTCAC  
 ACCTATTGGAATTACCTCATTGTTAAGATAcaacaacaacaacaacaacaacaacaacaaca  
 acaacaacaacaacaacaacaacaacaacaacaATGGTCTTCACACTCGAAGATTTTCGTTGGGGACTGGC  
 GACAGACAGCCGGCTACAACCTGGACCAAGTCCTTGAACAGGGAGGTGTGTCCAGTTTGT  
 TTCAGAATCTCGGGGTGTCCGTAACCTCCGATCCAAAGGATTGTCCTGAGCGGTGAAAATG  
 GGCTGAAGATCGACATCCATGTCATCATCCCGTATGAAGGTCTGAGCGGCGACCAAATGG  
 GCCAGATCGAAAAATTTTAAAGGTGGTGTACCCTGTGGATGATCATCACTTTAAGGTGATC  
 CTGCACTATGGCACACTGGTAATCGACGGGGTTACGCCGAACATGATCGACTATTTTCGGA  
 CGGCCGTATGAAGGCATCGCCGTGTTTCGACGGCAAAAAGATCACTGTAACAGGGACCCTG  
 TGGAACGGCAACAAAATTATCGACGAGCGCCTGATCAACCCCGACGGCTCCCTGCTGTT  
 CGAGTAACCATCAACGGAGTGACCGGCTGGCGGCTGTGCGAACGCATTCTGGCGGACTA  
 CAAAGACCATGACGGTGATTATAAAGATCATGACATCGATTACAAGGATGACGATGACAAG  
 TAAAGGCCGCGACTCTAGA

**pcDNA3.1+/PV IRES uORF nLuc (Sacl/Xbal)\_16 nt spacer**

GAGCTCTCTGGCTAACTAGAGAACCCACTGCTTACTGGCTTATCGAAATTAATACGACTCA  
 CTATAGGGCTCGAGTTGGGGCGCGTGGTGGCGGCTGCAGCCGCCACCACGCGCCCCGG  
 aaaaaAAGCTTGGGCTGCAGGTCTTAAACAGCTCTGGGGTTGTACCCACCCCAGAGGCC  
 ACGTGGCGGCTAGTACTCCGGTATTGCGGTACCTTTGTACGCCTGTTTTATACTCCCTTCC  
 CCCGTAACCTAGAAGCACAATGTCCAAGTTCAATAGGAGGGGGTACAAACCAGTACCACCA  
 CGAACAAGCACTTCTGTTCCCCCGGTGAGGCTGTATAGGCTGTTTCCACGGCTAAAAGCG  
 GCTGATCCGTTATCCGCTCATGTACTTCGAGAAGCCTAGTATCACCTTGAATCTTCGATG  
 CGTTGCGCTCAACACTCAACCCAGAGTGTAGCTTAGGTCGATGAGTCTGGACGTTCTCA  
 CCGGCGACGGTGGTCCAGGCTGCGTTGGCGGCCTACCTGTGGCCCAAAGCCACAGGACG  
 CTAGTTGTGAACAAGGTGTGAAGAGCCTATTGAGCTACCTGAGAGTCTCCGGCCCCCTGA





CCCCCCCCTAACGTTACTGGCCGAAGCCGCTTGAATAAGGCCGGTGTGCGTTTGTCTA  
TATGTTATTTTCCACCATATTGCCGTCTTTTGGCAATGTGAGGGCCCGGAAACCTGGCCCT  
GTCTTCTTGACGAGCATTCTAGGGGTCTTTCCCCTCTCGCCAAAGGAATGCAAGGTCTGT  
TGAATGTCGTGAAGGAAGCAGTTCCTCTGGAAGCTTCTTGAAGACAAACAACGTCTGTAGC  
GACCCTTTGCAGGCAGCGGAACCCCCACCTGGCGACAGGTGCCTCTGCGGCCAAAAGC  
CACGTGTATAAGATACACCTGCAAAGGCCGCAACCCCCAGTGCCACGTTGTGAGTTGGA  
TAGTTGTGGAAAGAGTCAAATGGCTCTCCTCAAGCGTATTCAACAAGGGGCTGAAGGATGC  
CCAGAAGGTACCCCATTTGTATGGGATCTGATCTGGGGCCTCGGTGCACATGCTTTACATGT  
GTTTAGTCGAGGTTAAAAAACGTCTAGGCCCCCCGAACCACGGGGACGTGGTTTTCTTTG  
AAAAACACGatgataatATGGTCTTCACACTCGAAGATTTTCGTTGGGGACTGGCGACAGACAG  
CCGGCTACAACCTGGACCAAGTCCTTGAACAGGGAGGTGTGTCCAGTTTGTTCAGAATCT  
CGGGGTGTCCGTAACCTCCGATCCAAAGGATTGTCCTGAGCGGTGAAAATGGGCTGAAGAT  
CGACATCCATGTCATCATCCCCTATGAAGGTCTGAGCGGCGACCAAATGGGCCAGATCGA  
AAAATTTTAAAGGTGGTGTACCCTGTGGATGATCATCACTTTAAGGTGATCCTGCACTATG  
GCACACTGGTAATCGACGGGGTTACGCCGAACATGATCGACTATTTCCGGGCGGCCGTATG  
AAGGCATCGCCGTGTTTCGACGGCAAAAAGATCACTGTAACAGGGACCCTGTGGAACGGCA  
ACAAAATTATCGACGAGCGCCTGATCAACCCCGACGGCTCCCTGCTGTTCCGAGTAACCAT  
CAACGGAGTGACCGGCTGGCGGCTGTGCGAACGCATTCTGGCGGACTACAAAGACCATG  
ACGGTGATTATAAAGATCATGACATCGATTACAAGGATGACGATGACAAGTAAAGGGTCA  
AGACAATTCTGCAGATATCCAGCACAGTGCGCGGCCGCTCGAGTCTAGA

**pcDNA3.1-D/EMCV IRES uORF nLuc (Sacl/Xbal)\_16 nt spacer**

GAGCTCTCTGGCTAACTAGAGAACCCACTGCTTACTGGCTTATCGAAATTAATACGACTCA  
CTATAGGGAGACCCAAGCTGGTTGGGGCGCGTGGTGGCGGCTGCAGCCGCCACCACGC  
GCCCCGGCTAGTTAAGCTTGGTACCGAGCTCGGATCCGCCCTCGAGCGGGATCAATTCCG  
CCCCCCCCTAACGTTACTGGCCGAAGCCGCTTGAATAAGGCCGGTGTGCGTTTGTCTA  
TATGTTATTTTCCACCATATTGCCGTCTTTTGGCAATGTGAGGGCCCGGAAACCTGGCCCT  
GTCTTCTTGACGAGCATTCTAGGGGTCTTTCCCCTCTCGCCAAAGGAATGCAAGGTCTGT  
TGAATGTCGTGAAGGAAGCAGTTCCTCTGGAAGCTTCTTGAAGACAAACAACGTCTGTAGC  
GACCCTTTGCAGGCAGCGGAACCCCCACCTGGCGACAGGTGCCTCTGCGGCCAAAAGC  
CACGTGTATAAGATACACCTGCAAAGGCCGCAACCCCCAGTGCCACGTTGTGAGTTGGA  
TAGTTGTGGAAAGAGTCAAATGGCTCTCCTCAAGCGTATTCAACAAGGGGCTGAAGGATGC  
CCAGAAGGTACCCCATTTGTATGGGATCTGATCTGGGGCCTCGGTGCACATGCTTTACATGT  
GTTTAGTCGAGGTTAAAAAACGTCTAGGCCCCCCGAACCACGGGGACGTGGTTTTCTTTG  
AAAAACACGatgataatatggtcaccatggtcaccatggtcacaacaacaacaacaatATGGTCTTCACACTCG  
AAGATTTTCGTTGGGGACTGGCGACAGACAGCCGGCTACAACCTGGACCAAGTCCTTGAAC  
AGGGAGGTGTGTCCAGTTTGTTCAGAATCTCGGGGTGTCCGTAACCTCCGATCCAAAGGAT  
TGTCTGAGCGGTGAAAATGGGCTGAAGATCGACATCCATGTCATCATCCCCTATGAAGGT  
CTGAGCGGCGACCAAATGGGCCAGATCGAAAAAATTTTAAAGGTGGTGTACCCTGTGGAT  
GATCATCACTTTAAGGTGATCCTGCACTATGGCACACTGGTAATCGACGGGGTTACGCCGA  
ACATGATCGACTATTTCCGGGCGGCCGTATGAAGGCATCGCCGTGTTTCGACGGCAAAAAGA  
TCACTGTAACAGGGACCCTGTGGAACGGCAACAAAATTATCGACGAGCGCCTGATCAACC  
CCGACGGCTCCCTGCTGTTCCGAGTAACCATCAACGGAGTGACCGGCTGGCGGCTGTGC  
GAACGCATTCTGGCGGACTACAAAGACCATGACGGTGATTATAAAGATCATGACATCGATT  
ACAAGGATGACGATGACAAGTAAAGGGTCAAGACAATTCTGCAGATATCCAGCACAGTGG  
CGGCCGCTCGAGTCTAGA

**pcDNA3.1-D/EMCV IRES uORF nLuc (Sacl/Xbal)\_115 nt spacer**

GAGCTCTCTGGCTAACTAGAGAACCCACTGCTTACTGGCTTATCGAAATTAATACGACTCA  
CTATAGGGAGACCCAAGCTGGTTGGGGCGCGTGGTGGCGGCTGCAGCCGCCACCACGC  
GCCCCGGCTAGTTAAGCTTGGTACCGAGCTCGGATCCGCCCTCGAGCGGGATCAATTCCG

CCCCCCCCTAACGTTACTGGCCGAAGCCGCTTGAATAAGGCCGGTGTGCGTTTGTCTA  
TATGTTATTTTCCACCATATTGCCGTCTTTTGGCAATGTGAGGGCCCGGAAACCTGGCCCT  
GTCTTCTTGACGAGCATTCTAGGGGTCTTTCCCCTCTCGCCAAAGGAATGCAAGGTCTGT  
TGAATGTCGTGAAGGAAGCAGTTCCTCTGGAAGCTTCTTGAAGACAAACAACGTCTGTAGC  
GACCCTTTGCAGGCAGCGGAACCCCCACCTGGCGACAGGTGCCTCTGCGGCCAAAAGC  
CACGTGTATAAGATACACCTGCAAAGGCGGCACAACCCAGTGCCACGTTGTGAGTTGGA  
TAGTTGTGGAAGAGTCAAATGGCTCTCCTCAAGCGTATTCAACAAGGGGCTGAAGGATGC  
CCAGAAGGTACCCCATTTGATGGGATCTGATCTGGGGCCTCGGTGCACATGCTTTACATGT  
GTTTAGTCGAGGTTAAAAACGTCTAGGCCCCCGAACCACGGGGACGTGGTTTTCTTTG  
AAAAACACGatgataatggtcaccatggtcaccatggtcacaacaacaacaacaacaacaacaaca  
caacaacaacaacaacaacaacaacaacaacaacaacaacaacaacaacaacaacaacaaca  
ATGGTCTTCACACTCGAAGATTTTCGTTGGGGACTGGCGACAGACAGCCGGCTACAACCTG  
GACCAAGTCCTTGAACAGGGAGGTGTGTCCAGTTTGTTCAGAATCTCGGGGTGTCCGTAA  
CTCCGATCCAAAGGATTGTCCTGAGCGGTGAAAATGGGCTGAAGATCGACATCCATGTCAT  
CATCCCGTATGAAGGTCTGAGCGGCGACCAAATGGGCCAGATCGAAAAAATTTTAAGGTG  
GTGTACCCTGTGGATGATCATCACTTTAAGGTGATCCTGCACTATGGCACACTGGTAATCG  
ACGGGGTTACGCCGAACATGATCGACTATTTTCGGGCGGCCGTATGAAGGCATCGCCGTGT  
TCGACGGCAAAAAGATCACTGTAACAGGGACCCTGTGGAACGGCAACAAAATTATCGACG  
AGCGCCTGATCAACCCCGACGGCTCCCTGCTGTTCCGAGTAACCATCAACGGAGTGACCG  
GCTGGCGGCTGTGCGAACGCATTCTGGCGGACTACAAAGACCATGACGGTGATTATAAAG  
ATCATGACATCGATTACAAGGATGACGATGACAAGTAAAGGGTCAAGACAATTCTGCAGA  
TATCCAGCACAGTGGCGGCCGCTCGAGTCTAGA

**pcDNA3.1-D/HCV no uORF nLuc (Sacl/XbaI)**

GAGCTCTCTGGCTAACTAGAGAACCCACTGCTTACTGGCTTATCGAAATTAATACGACTCA  
CTATAGGGAGACCCAAGCTGGTTGGGGCGCGTGGTGGCGGCTGCAGCCGCCACCACGC  
GCCCCGGCTAGTTAAGCTTGGTACCGAGCTCGGATCCCCTGTGAGGAAGTACTGTCTTCA  
CGCAGAAAGCGCCTAGCCATGGCGTTAGTATGAGTGTGACAGCCTCCAGGCCCCCCCCC  
TCCCGGGAGAGCCATAGTGGTCTGCGGAACCGGTGAGTACACCGGAATTGCCGGGAAGA  
CTGGGTCTTTCTTGGATAAACCCACTCTATGCCCGGCCATTTGGGCGTGCCCCCGCAAG  
ACTGCTAGCCGAGTAGCGTTGGGTTGCGAAAGGCCTTGTGGTACTGCCTGATAGGGCGCT  
TGCGAGTGCCCCGGGAGGTCTCGTAGACCGTGCatcatgagcacgaatcctaaacctcaagaaaaATG  
GTCTTCACACTCGAAGATTTTCGTTGGGGACTGGCGACAGACAGCCGGCTACAACCTGGAC  
CAAGTCCTTGAACAGGGAGGTGTGTCCAGTTTGTTCAGAATCTCGGGGTGTCCGTAACTC  
CGATCCAAAGGATTGTCCTGAGCGGTGAAAATGGGCTGAAGATCGACATCCATGTCATCAT  
CCCGTATGAAGGTCTGAGCGGCGACCAAATGGGCCAGATCGAAAAAATTTTAAGGTGGT  
GTACCCTGTGGATGATCATCACTTTAAGGTGATCCTGCACTATGGCACACTGGTAATCGAC  
GGGGTTACGCCGAACATGATCGACTATTTTCGGACGGCCGTATGAAGGCATCGCCGTGTT  
GACGGCAAAAAGATCACTGTAACAGGGACCCTGTGGAACGGCAACAAAATTATCGACGAG  
CGCCTGATCAACCCCGACGGCTCCCTGCTGTTCCGAGTAACCATCAACGGAGTGACCGGC  
TGCGGGCTGTGCGAACGCATTCTGGCGGACTACAAAGACCATGACGGTGATTATAAAGAT  
CATGACATCGATTACAAGGATGACGATGACAAGTAAAGGGTCAAGACAATTCTGCAGATA  
TCCAGCACAGTGGCGGCCGCTCGAGTCTAGA

**pcDNA3.1-D/HCV IRES uORF nLuc (Sacl/XbaI)\_16 nt spacer**

GAGCTCTCTGGCTAACTAGAGAACCCACTGCTTACTGGCTTATCGAAATTAATACGACTCA  
CTATAGGGAGACCCAAGCTGGTTGGGGCGCGTGGTGGCGGCTGCAGCCGCCACCACGC  
GCCCCGGCTAGTTAAGCTTGGTACCGAGCTCGGATCCCCTGTGAGGAAGTACTGTCTTCA  
CGCAGAAAGCGCCTAGCCATGGCGTTAGTATGAGTGTGACAGCCTCCAGGCCCCCCCCC  
TCCCGGGAGAGCCATAGTGGTCTGCGGAACCGGTGAGTACACCGGAATTGCCGGGAAGA  
CTGGGTCTTTCTTGGATAAACCCACTCTATGCCCGGCCATTTGGGCGTGCCCCCGCAAG

ACTGCTAGCCGAGTAGCGTTGGGTTGCGAAAGGCCTTGTGGTACTGCCTGATAGGGCGCT  
TGCGAGTGCCCCGGGAGGTCTCGTAGACCGTGCatcatgagcacgaatcctaaacctcaaagaaaa<sup>taa</sup>  
caacaacaacaacaaATGGTCTTCACACTCGAAGATTTTCGTTGGGGACTGGCGACAGACAGCCG  
GCTACAACCTGGACCAAGTCCTTGAACAGGGAGGTGTGTCCAGTTTGTTCAGAATCTCGG  
GGTGTCCGTAACCTCCGATCCAAAGGATTGTCCTGAGCGGTGAAAATGGGCTGAAGATCGA  
CATCCATGTCATCATCCCGTATGAAGGTCTGAGCGGCGACCAAATGGGCCAGATCGAAAA  
AATTTTTAAGGTGGTGTACCCTGTGGATGATCATCACTTTAAGGTGATCCTGCACTATGGCA  
CACTGGTAATCGACGGGGTTACGCCGAACATGATCGACTATTTCCGACGGCCGTATGAAG  
GCATCGCCGTGTTCCGACGGCAAAAAGATCACTGTAACAGGGACCCTGTGGAACGGCAACA  
AAATTATCGACGAGCGCCTGATCAACCCCGACGGCTCCCTGCTGTTCCGAGTAACCATCAA  
CGGAGTGACCGGCTGGCGGCTGTGCGAACGCATTCTGGCGGACTACAAAGACCATGACG  
GTGATTATAAAGATCATGACATCGATTACAAGGATGACGATGACAAGTAA<sup>AAGGGTCAAGA</sup>  
CAATTCTGCAGATATCCAGCACAGTGGCGGCCGCTCGAGTCTAGA

**pcDNA3.1-D/HCV IRES uORF nLuc (Sacl/Xbal)\_115 nt spacer**

GAGCTCTCTGGCTAACTAGAGAACCCACTGCTTACTGGCTTATCGAAATTAATACGACTCA  
CTATAGGGAGACCCAAGCTGGTT**GGGGCGCGTGGTGGCGGCTGCAGCCGCCACCACGC**  
**GCCCCGG**CTAGTTAAGCTTGGTACCGAGCTCGGAT**CCCCTGTGAGGA**ACTACTGTCTTCA  
CGCAGAAAGCGCCTAGCCATGGCGTTAGTATGAGTGTCTGACAGCCTCCAGGCCCCCCC  
TCCCGGGAGAGCCATAGTGGTCTGCGGAACCGGTGAGTACACCGGAATTGCCGGGAAGA  
CTGGGTCTTTCTTGGATAAACCCACTCTATGCCCGGCCATTTGGGCGTGCCCCCGCAAG  
ACTGCTAGCCGAGTAGCGTTGGGTTGCGAAAGGCCTTGTGGTACTGCCTGATAGGGCGCT  
TGCGAGTGCCCCGGGAGGTCTCGTAGACCGTGCatcatgagcacgaatcctaaacctcaaagaaaa<sup>taa</sup>  
caacaacaacaacaacaacaacaacaacaacaacaacaacaacaacaacaacaacaacaacaaca  
aacaacaacaacaacaacaacaacaacaacaacaacaacaacaacaacaacaacaacaacaaca  
aATGGTCTTCACACTCGAAGATTTTCGTTGGGGACT  
GGCGACAGACAGCCGGCTACAACCTGGACCAAGTCCTTGAACAGGGAGGTGTGTCCAGTT  
TGTTTCAGAATCTCGGGGTGTCCGTAACCTCCGATCCAAAGGATTGTCCTGAGCGGTGAAA  
TGGGCTGAAGATCGACATCCATGTCATCATCCCGTATGAAGGTCTGAGCGGCGACCAAAT  
GGGCCAGATCGAAAAAATTTTTAAGGTGGTGTACCCTGTGGATGATCATCACTTTAAGGTG  
ATCCTGCACTATGGCACACTGGTAATCGACGGGGTTACGCCGAACATGATCGACTATTTCC  
GACGGCCGTATGAAGGCATCGCCGTGTTCCGACGGCAAAAAGATCACTGTAACAGGGACCC  
TGTGGAACGGCAACAAATTATCGACGAGCGCCTGATCAACCCCGACGGCTCCCTGCTGT  
TCCGAGTAACCATCAACGGAGTGACCGGCTGGCGGCTGTGCGAACGCATTCTGGCGGAC  
TACAAAGACCATGACGGTATTATAAAGATCATGACATCGATTACAAGGATGACGATGACA  
AGTAA<sup>AAGGGTCAAGACAATTCTGCAGATATCCAGCACAGTGGCGGCCGCTCGAGTCTAG</sup>  
A

**pcDNA3.1-D/CrPV IGR IRES no uORF nLuc (Sacl/Xbal)**

GAGCTCTCTGGCTAACTAGAGAACCCACTGCTTACTGGCTTATCGAAATTAATACGACTCA  
CTATAGGGAGACCCAAGCTGGTT**GGGGCGCGTGGTGGCGGCTGCAGCCGCCACCACGC**  
**GCCCCGG**CTAGTTAAGCTTGGTACCGAGCTCGGATCCAGTACCCTTCACC**AAAGCAAAAAT**  
**GTGATCTTGCTTGTA**AATAACAATTTGAGAGGTTAATAAATTACAAGTAGTGCTATTTTTGTA  
TTTAGGTTAGCTATTTAGCTTACGTTCCAGGATGCCTAGTGGCAGCCCACAATATCCAG  
GAAGCCCTCTCTCGGTTTTTTCAGATTAGGTAGTTCGAAAAACCTAAGAAATTTACCTGCTAC  
ATTTCAAGATACCATGGTCTTCACACTCGAAGATTTTCGTTGGGGACTGGCGACAGACAGCC  
GGCTACAACCTGGACCAAGTCCTTGAACAGGGAGGTGTGTCCAGTTTGTTCAGAATCTCG  
GGGTGTCCGTAACCTCCGATCCAAAGGATTGTCCTGAGCGGTGAAAATGGGCTGAAGATCG  
ACATCCATGTCATCATCCCGTATGAAGGTCTGAGCGGCGACCAAATGGGCCAGATCGAAA  
AAATTTTTAAGGTGGTGTACCCTGTGGATGATCATCACTTTAAGGTGATCCTGCACTATGGC  
CACTGGTAATCGACGGGGTTACGCCGAACATGATCGACTATTTCCGACGGCCGTATGAA  
GGCATCGCCGTGTTCCGACGGCAAAAAGATCACTGTAACAGGGACCCTGTGGAACGGCAAC

AAAATTATCGACGAGCGCCTGATCAACCCCGACGGCTCCCTGCTGTTCCGAGTAACCATCA  
ACGGAGTGACCGGCTGGCGGCTGTGCGAACGCATTCTGGCGGACTACAAAGACCATGAC  
GGTGATTATAAAGATCATGACATCGATTACAAGGATGACGATGACAAGTAAAGGGTCAAG  
ACAATTCTGCAGATATCCAGCACAGTGGCGGCCGCTCGAGTCTAGA

**pcDNA3.1-D/CrPV IGR IRES uORF nLuc (SacI/XbaI)\_16 nt spacer**

GAGCTCTCTGGCTAACTAGAGAACCCACTGCTTACTGGCTTATCGAAATTAATACGACTCA  
CTATAGGGAGACCCAAGCTGGTTGGGGCGCGTGGTGGCGGCTGCAGCCGCCACCACGC  
GCCCCGGCTAGTTAAGCTTGGTACCGAGCTCGGATCCAGTACCCTTCACCAAAGCAAAAAT  
GTGATCTTGCTTGTAATAACAATTTTGAGAGGTTAATAAATTACAAGTAGTGCTATTTTTGTA  
TTTAGGTTAGCTATTTAGCTTTACGTTCCAGGATGCCTAGTGGCAGCCCCACAATATCCAG  
GAAGCCCTCTCTGCGGTTTTTCAGATTAGGTAGTCGAAAACCTAAGAAATTTACCTGCTAC  
ATTTCAAGATACCAatggtcaccatggtcaccatggtcacaacaacaacaacaatATGGTCTTCACACTCGAA  
GATTCGTTGGGACTGGCGACAGACAGCCGGCTACAACCTGGACCAAGTCTTGAACAG  
GGAGGTGTGTCCAGTTTGTTCAGAAATCTCGGGGTGTCCGTAACCTCCGATCCAAAGGATTG  
TCCTGAGCGGTGAAAATGGGCTGAAGATCGACATCCATGTCATCATCCCCTATGAAGGTCT  
GAGCGGCGACCAAATGGGCCAGATCGAAAAATTTTTAAGGTGGTGTACCCTGTGGATGA  
TCATCACTTTAAGGTGATCCTGCACTATGGCACACTGGTAATCGACGGGGTTACGCCGAAC  
ATGATCGACTATTTCCGACGGCCGTATGAAGGCATCGCCGTGTTTCGACGGCAAAAAGATC  
ACTGTAACAGGGACCCTGTGGAACGGCAACAAAATTATCGACGAGCGCCTGATCAACCCC  
GACGGCTCCCTGCTGTTCCGAGTAACCATCAACGGAGTGACCGGCTGGCGGCTGTGCGA  
ACGCATTCTGGCGGACTACAAAGACCATGACGGTGATTATAAAGATCATGACATCGATTAC  
AAGGATGACGATGACAAGTAAAGGGTCAAGACAATTCTGCAGATATCCAGCACAGTGGC  
GGCCGCTCGAGTCTAGA

**pcDNA3.1-D/CrPV IGR IRES uORF nLuc (SacI/XbaI)\_115 nt spacer**

GAGCTCTCTGGCTAACTAGAGAACCCACTGCTTACTGGCTTATCGAAATTAATACGACTCA  
CTATAGGGAGACCCAAGCTGGTTGGGGCGCGTGGTGGCGGCTGCAGCCGCCACCACGC  
GCCCCGGCTAGTTAAGCTTGGTACCGAGCTCGGATCCAGTACCCTTCACCAAAGCAAAAAT  
GTGATCTTGCTTGTAATAACAATTTTGAGAGGTTAATAAATTACAAGTAGTGCTATTTTTGTA  
TTTAGGTTAGCTATTTAGCTTTACGTTCCAGGATGCCTAGTGGCAGCCCCACAATATCCAG  
GAAGCCCTCTCTGCGGTTTTTCAGATTAGGTAGTCGAAAACCTAAGAAATTTACCTGCTAC  
ATTTCAAGATACCAatggtcaccatggtcaccatggtcacaacaacaacaacaacaacaacaacaaca  
acaacaacaacaacaacaacaacaacaacaacaacaacaacaacaacaacaacaacaacaacaaca  
acaacaacaacaacaacaacaacaacaacaacaacaacaacaacaacaacaacaacaacaacaaca  
ATGG  
TCTTCACACTCGAAGATTTTCGTTGGGACTGGCGACAGACAGCCGGCTACAACCTGGACC  
AAGTCTTGAACAGGGAGGTGTGTCCAGTTTGTTCAGAAATCTCGGGGTGTCCGTAACCTCC  
GATCCAAAGGATTGTCTGAGCGGTGAAAATGGGCTGAAGATCGACATCCATGTCATCATC  
CCGATGAAGGTCTGAGCGGCGACCAAATGGGCCAGATCGAAAAATTTTTAAGGTGGTG  
TACCCTGTGGATGATCACTTTAAGGTGATCCTGCACTATGGCACACTGGTAATCGACG  
GGGTACGCCGAACATGATCGACTATTTCCGACGGCCGTATGAAGGCATCGCCGTGTTCC  
ACGGCAAAAAGATCACTGTAACAGGGACCCTGTGGAACGGCAACAAAATTATCGACGAGC  
GCCTGATCAACCCCGACGGCTCCCTGCTGTTCCGAGTAACCATCAACGGAGTGACCGGCT  
GGCGGCTGTGCGAACGCATTCTGGCGGACTACAAAGACCATGACGGTGATTATAAAGATC  
ATGACATCGATTACAAGGATGACGATGACAAGTAAAGGGTCAAGACAATTCTGCAGATAT  
CCAGCACAGTGGCGGCCGCTCGAGTCTAGA

**pTet-Off AIO/no uORF nLuc (MluI/XbaI)**

ACGCGTtgctcgagcactttggccgcgaatcgatatgtcagtttactccctatcagtgatagagaacgatgtcagtttactccct  
atcagtgatagagaacgatgtcagtttactccctatcagtgatagagaacgatgtcagtttactccctatcagtgatagagaacgat  
gtcagtttactccctatcagtgatagagaacgatgtcagtttactccctatcagtgatagagaacgatgtcagtttactccctatcagt  
gatagagaacgatgtcagtttactccctatcagtgatagagaacgatgtcagtttactccctatcagtgatagagaacgatgtcagtttactccctatcagt



CACTGGTAATCGACGGGGTTACGCCGAACATGATCGACTATTTCCGGACGGCCGTATGAAG  
GCATCGCCGTGTTTCGACGGCAAAAAGATCACTGTAACAGGGACCCTGTGGAACGGCAACA  
AAATTATCGACGTAAGTATCAAGGTTACAAGACAGGTTTAAAGGAGACCAATAGAACTGGG  
CTTGTCGAGACAGAGAAGACTCTTGCGTTTCTGATAGGCACCTATTGGTCTTACTGACATC  
CACTTTGCCTTTCTCTCCACAGGAGCGCCTGATCAACCCCGACGGCTCCCTGCTGTTCCG  
AGTAACCATCAACGGAGTGACCGGCTGGCGGCTGTGCGAACGCATTCTGGCGGACTACAA  
AGACCATGACGGTGATTATAAAGATCATGACATCGATTACAAGGATGACGATGACAAGTAA  
GGCCGCGACTCTAGA

**pTet-Off AIO/large uORF nLuc (MluI/XbaI)**

ACGCGTTgctcgagcactttggccgcgaatcgatatgtcgagttactccctatcagtgatagagaacgtatgtcgagttactccct  
atcagtgatagagaacgtatgtcgagttactccctatcagtgatagagaacgtatgtcgagttactccctatcagtgatagagaacgtat  
gtcgagttactccctatcagtgatagagaacgtatgtcgagttactccctatcagtgatagagaacgtatgtcgagttactccctatcagt  
gatagagaacgtatgtcgaggtaggcgtgtacggtagggaggcctataagcaGAGCTCTCTGGCTAACTAGAGAA  
CCCACTGCTTACTGGCTTATCGAAATTAATACGACTCACTATAGGaaacaacaacaacaacaac  
aacaacaacaacaacaacaacaacaacaacaacaacaacaacaacaccatggtcaccatggtcaccatggtcGCA  
GAAATCGGTAAGTGGCTTTCCATTTCGACCCCAATTATGTGGAAGTCTGGGCGAGCGCATG  
CACTACGTCGATGTTGGTCCGCGCGATGGCACCCCTGTGCTGTTCTCCTGCACGGTAACCCG  
ACCTCCTCCTACGTGTGGCGCAACATCATCCCGCATGTTGCACCGACCCATCGCTGCATT  
GCTCCAGACCTGATCGGTATGGGCAAATCCGACAAACCAGACCTGGGTTATTTCTTCGACG  
ACCACGTCCGCTTCATGGATGCCTTCATCGAAGCCCTGGGTCTGGAAGAGGTGCTCCTGG  
TCATTCACGACTGGGGCTCCGCTCTGGGTTTCACTGGGCCAAGCGCAATCCAGAGCGCG  
TCAAAGGTATTGCATTTATGGAGTTCATCCGCCCTATCCCGACCTGGGACGAATGGCCAGA  
ATTTGCCCGCGAGACCTTCCAGGCCTTCCGCAACCACCGACGTCGGCCGCAAGCTGATCAT  
CGATCAGAACGTTTTTATCGAGGGTACGCTGCCGATGGGTGTCGTCCGCCCGCTGACTGA  
AGTCGAGATGGACCATTACCGCGAGCCGTTTCTGAATCCTGTTGACCGCGAGCCACTGTG  
GCGCTTCCCAAACGAGCTGCCAATCGCCGGTGAGCCAGCGAACATCGTCGCGCTGGTCG  
AAGAATACATGGACTGGCTGCACCAGTCCCCTGTCCCGAAGCTGCTGTTCTGGGGCACCC  
CAGGCGTTCTGATCCCACCGGCCGAAGCCGCTCGCCTGGCCAAAAGCCTGCCTAACTGCA  
AGGCTGTGGACATCGGCCCGGGTCTGAATCTGCTGCAAGAAGACAACCCGGACCTGATCG  
GCAGCGAGATCGCGCGCTGGCTGTCGACGCTCGAGATTTCCGGCCACCGGTGCAACCT  
TGGGTACCGCGGGCCCGGGATCCACCGGTGCAACCTTGGTGAGCAAGGGCGAGGAGCT  
GTTACCGGGGTGGTGCCATCCTGGTTCGAGCTGGACGGCGACGTAACGGCCACAAGT  
TCAGCGTGTCCGGCGAGGGCGAGGGCGATGCCACCTACGGCAAGCTGACCCTGAAGTTC  
ATCTGCACCACCGGCAAGCTGCCCGTGCCCTGGCCACCCTCGTGACCACCCTGACCTAC  
GGCGTGCAGTGCTTCAGCCGCTACCCCGACCACATGAAGCAGCACGACTTCTTCAAGTCC  
GCCATGCCCGAAGGCTACGTCCAGGAGCGCACCATCTTCTTCAAGGACGACGGCAACTAC  
AAGACCCGCGCCGAGGTGAAGTTCGAGGGGCGACACCCTGGTGAACCGCATCGAGCTGAA  
GGGCATCGACTTCAAGGAGGACGGCAACATCCTGGGGCACAAGCTGGAGTACAACACTACAA  
CAGCCACAACGTCTATATCATGGCCGACAAGCAGAAGAACGGCATCAAGGTGAACCTCAA  
GATCCGCCACAACATCGAGGACGGCAGCGTGCAGCTCGCCGACCACTACCAGCAGAACA  
CCCCATCGGCGACGGCCCGTGCTGCTGCCCGACAACCACTACCTGAGCACCCAGTCC  
GCCCTGAGCAAAGACCCCAACGAGAAGCGCGATCACATGGTCTGCTGGAGTTCGTGACC  
GCCGCCGGGATCACTCTCGGCATGGACGAGCTGTACAAGtaacaacaacaacaacaATGGTC  
TTCACACTCGAAGATTTCTGTTGGGACTGGCGACAGACAGCCGGCTACAACCTGGACCAA  
GTCCTTGAACAGGGAGGTGTGTCCAGTTTGTTCAGAATCTCGGGGTGTCCGTAACCTCCGA  
TCCAAGGATTGCTCTGAGCGGTGAAAATGGGCTGAAGATCGACATCCATGTCATCATCCC  
GTATGAAGGTCTGAGCGGCCACCAATGGGCCAGATCGAAAAATTTTAAAGGTGGTGTAC  
CCTGTGGATGATCATCACTTTAAGGTGATCCTGCACTATGGCACACTGGTAATCGACGGGG  
TTACGCCGAACATGATCGACTATTTCCGGACGGCCGTATGAAGGCATCGCCGTGTTCCGACG  
GCAAAAAGATCACTGTAACAGGGACCCTGTGGAACGGCAACAAAATTATCGACGTAAGTAT

CAAGGTTACAAGACAGGTTTAAGGAGACCAATAGAAACTGGGCTTGTCGAGACAGAGAAG  
ACTCTTGCGTTTCTGATAGGCACCTATTGGTCTTACTGACATCCACTTTGCCTTTCTCTCA  
CAGGAGCGCCTGATCAACCCCGACGGCTCCCTGCTGTTCCGAGTAACCATCAACGGAGTG  
ACCGGCTGGCGGCTGTGCGAACGCATTCTGGCGGACTACAAAGACCATGACGGTGATTAT  
AAAGATCATGACATCGATTACAAGGATGACGATGACAAGTAAGGCCGCGACTCTAGA

**pTet-Off AIO/HP + no uORF nLuc (Mlul/XbaI)**

ACGCGTTgctcgagcactttggccgcgaatcgatatgtcgagtttactccctatcagtgatagagaacgtatgtcgagtttactccct  
atcagtgatagagaacgtatgtcgagtttactccctatcagtgatagagaacgtatgtcgagtttactccctatcagtgatagagaacgtat  
gtcgagtttactccctatcagtgatagagaacgtatgtcgagtttactccctatcagtgatagagaacgtatgtcgagtttactccctatcagt  
gatagagaacgtatgtcgaggttaggcgtgtacgggtgggagcctataagcaGAGCTCacatttgcttctgacacaactgtgttc  
actagcaacctcaacagacacc**TTGGGGCGCGTGGTGGCGGCTGCAGCCGCCACCACGGGCCCC**  
**GGTCTGGCTAACTAGAGAACCCACTGCTTACTGGCTTATCGAAATTAATACGACTCACTATA**  
**GGcaacaacaacaacaacaacaacaacaacaacaacaacaacaacaacaacaacaacaacaacaacaacaacaacaacaacaacaaca**ATG  
GTCTTCACACTCGAAGATTTTCGTTGGGGACTGGCGACAGACAGCCGGCTACAACCTGGAC  
CAAGTCCTTGAACAGGGAGGTGTGTCCAGTTTGTTTCAGAATCTCGGGGTGTCCGTAACCTC  
CGATCCAAAGGATTGTCCTGAGCGGTGAAAATGGGCTGAAGATCGACATCCATGTCATCAT  
CCCGTATGAAGGTCTGAGCGGCGACCAAATGGGCCAGATCGAAAAAATTTTTAAGGTGGT  
GTACCCTGTGGATGATCATCACTTTAAGGTGATCCTGCACTATGGCACACTGGTAATCGAC  
GGGGTTACGCCGAACATGATCGACTATTTTCGACGGCCGTATGAAGGCATCGCCGTGTTT  
GACGGCAAAAAGATCACTGTAACAGGGACCCTGTGGAACGGCAACAAAATTATCGACGTA  
AGTATCAAGGTTACAAGACAGGTTTAAGGAGACCAATAGAAACTGGGCTTGTCGAGACAGA  
GAAGACTCTTGCGTTTCTGATAGGCACCTATTGGTCTTACTGACATCCACTTTGCCTTTCTC  
TCCACAGGAGCGCCTGATCAACCCCGACGGCTCCCTGCTGTTCCGAGTAACCATCAACGG  
AGTGACCGGCTGGCGGCTGTGCGAACGCATTCTGGCGGACTACAAAGACCATGACGGTG  
ATTATAAAGATCATGACATCGATTACAAGGATGACGATGACAAGTAAAGGCCGCGACTCTAG  
A

**pTet-Off AIO/HP + no uORF nLuc + 3' UTR intron (Mlul/PfIMI)**

ACGCGTTgctcgagcactttggccgcgaatcgatatgtcgagtttactccctatcagtgatagagaacgtatgtcgagtttactccct  
atcagtgatagagaacgtatgtcgagtttactccctatcagtgatagagaacgtatgtcgagtttactccctatcagtgatagagaacgtat  
gtcgagtttactccctatcagtgatagagaacgtatgtcgagtttactccctatcagtgatagagaacgtatgtcgagtttactccctatcagt  
gatagagaacgtatgtcgaggttaggcgtgtacgggtgggagcctataagcaGAGCTCacatttgcttctgacacaactgtgttc  
actagcaacctcaacagacacc**TTGGGGCGCGTGGTGGCGGCTGCAGCCGCCACCACGGGCCCC**  
**GGTCTGGCTAACTAGAGAACCCACTGCTTACTGGCTTATCGAAATTAATACGACTCACTATA**  
**GGcaacaacaacaacaacaacaacaacaacaacaacaacaacaacaacaacaacaacaacaacaacaacaacaacaacaacaacaaca**ATG  
GTCTTCACACTCGAAGATTTTCGTTGGGGACTGGCGACAGACAGCCGGCTACAACCTGGAC  
CAAGTCCTTGAACAGGGAGGTGTGTCCAGTTTGTTTCAGAATCTCGGGGTGTCCGTAACCTC  
CGATCCAAAGGATTGTCCTGAGCGGTGAAAATGGGCTGAAGATCGACATCCATGTCATCAT  
CCCGTATGAAGGTCTGAGCGGCGACCAAATGGGCCAGATCGAAAAAATTTTTAAGGTGGT  
GTACCCTGTGGATGATCATCACTTTAAGGTGATCCTGCACTATGGCACACTGGTAATCGAC  
GGGGTTACGCCGAACATGATCGACTATTTTCGACGGCCGTATGAAGGCATCGCCGTGTTT  
GACGGCAAAAAGATCACTGTAACAGGGACCCTGTGGAACGGCAACAAAATTATCGACGTA  
AGTATCAAGGTTACAAGACAGGTTTAAGGAGACCAATAGAAACTGGGCTTGTCGAGACAGA  
GAAGACTCTTGCGTTTCTGATAGGCACCTATTGGTCTTACTGACATCCACTTTGCCTTTCTC  
TCCACAGGAGCGCCTGATCAACCCCGACGGCTCCCTGCTGTTCCGAGTAACCATCAACGG  
AGTGACCGGCTGGCGGCTGTGCGAACGCATTCTGGCGGACTACAAAGACCATGACGGTG  
ATTATAAAGATCATGACATCGATTACAAGGATGACGATGACAAGTAAAGGCCGCGACTCTAG  
AGGGCCCGTTTAAACCCGCTGATCAGCCTCGAGCAGAAATCGGTAAGTGGCTTTCCATTTCG  
ACGTAAGTATCAAGGTTACAAGACAGGTTTAAGGAGACCAATAGAAACTGGGCTTGTCGAG



ACAGAGAAGACTCTTGCGTTTCTGATAGGCACCTATTGGTCTTACTGACATCCACTTTGCCT  
TTCTCTCCACAGCCCCATTATGTGG

**pTet-Off AIO/HP + uORF nLuc (Mlul/XbaI)**

ACGCGTTgctcgagcactttggccgcaatcgatatgtcgagttactccctatcagtgatagagaacgtatgtcgagttactccct  
atcagtgatagagaacgtatgtcgagttactccctatcagtgatagagaacgtatgtcgagttactccctatcagtgatagagaacgtat  
gtcgagttactccctatcagtgatagagaacgtatgtcgagttactccctatcagtgatagagaacgtatgtcgagttactccctatcag  
gatagagaacgtatgtcgaggtaggcgtgtacgggtgggaggcctataagcaGAGCTCacatttgcttctgacacaactgtgttc  
actagcaacctcaaacagacacc**TTGGGGCGCGTGGTGGCGGCTGCAGCCGCCACCACGCGCCCC**  
**GGTCTGGCTAACTAGAGAACCCACTGCTTACTGGCTTATCGAAATTAATACGACTCACTATA**  
GGaacaacaacaacaacaacaacaacaacaacaacaacaacaacaacaacaacaacaacaacaacaacaacaacaacaacaacacc  
atggtcaccatggtcaccatggtc**taa**acaacaacaacaacaaca**ATGGTCTTCACTCGAAGATTTTCGTTGGG**  
GACTGGCGACAGACAGCCGGCTACAACCTGGACCAAGTCCTTGAACAGGGAGGTGTGTC  
CAGTTTGTTCAGAATCTCGGGGTGTCCGTA**ACTCCGATCCAAGGATTGTCCTGAGCGGT**  
GAAATGGGCTGAAGATCGACATCCATGTCATCATCCCGTATGAAGGTCTGAGCGCGAC  
CAAATGGGCCAGATCGAAAAAATTTTAAAGGTGGTGTACCCTGTGGATGATCATCACTTTAA  
GGT**GATCCTGCACTATGGCACACTGGTAATCGACGGGGTTACGCCGAACATGATCGACTA**  
TTTCGGACGGCCGTATGAAGGCATCGCCGTGTT**CGACGGCAAAAAGATCACTGTAACAGG**  
GACCCTGTGGAACGGCAACAAAATTATCGACGTAAGTATCAAGGTTACAAGACAGGTTTAA  
GGAGACCAATAGAACTGGGCTTGT**CGAGACAGAGAAGACTCTTGCGTTTCTGATAGGCA**  
**CCTATTGGTCTTACTGACATCCACTTTGCCTTTCTCTCCACAGGAGCGCCTGATCAACCCC**  
GACGGCTCCCTGCTGTTCCGAGTAACCATCAACGGAGTGACCGGCTGGCGGCTGTGCGA  
ACGCATTCTGGCGGACTACAAAGACCATGACGGTGATTATAAAGATCATGACATCGATTAC  
AAGGATGACGATGACAAGTAA**GGCCGCGACTCTAGA**

**pTet-Off AIO/HP + large uORF nLuc (Mlul/XbaI)**

ACGCGTTgctcgagcactttggccgcaatcgatatgtcgagttactccctatcagtgatagagaacgtatgtcgagttactccct  
atcagtgatagagaacgtatgtcgagttactccctatcagtgatagagaacgtatgtcgagttactccctatcagtgatagagaacgtat  
gtcgagttactccctatcagtgatagagaacgtatgtcgagttactccctatcagtgatagagaacgtatgtcgagttactccctatcag  
gatagagaacgtatgtcgaggtaggcgtgtacgggtgggaggcctataagcaGAGCTCacatttgcttctgacacaactgtgttc  
actagcaacctcaaacagacacc**TTGGGGCGCGTGGTGGCGGCTGCAGCCGCCACCACGCGCCCC**  
**GGTCTGGCTAACTAGAGAACCCACTGCTTACTGGCTTATCGAAATTAATACGACTCACTATA**  
GGaacaacaacaacaacaacaacaacaacaacaacaacaacaacaacaacaacaacaacaacaacaacaacaacaacaacacca  
tggtcaccatggtcaccatggtc**GCAGAAATCGGTACTGGCTTTCATTTCGACCCCCATTATGTGGAA**  
GTCTTGGGCGAGCGCATGCACTACGTCGATGTTGGTCCGCGCGATGGCACCCCTGTGCT  
GTTCTGCACGGTAACCCGACCTCCTCCTACGTGTGGCGCAACATCATCCCGCATGTTGC  
ACCGACCCATCGCTGCATTGCTCCAGACCTGATCGGTATGGGCAAATCCGACAAACCAGA  
CCTGGGTTATTTCTTCGACGACCACGTCCGCTTCATGGATGCCTTCATCGAAGCCCTGGGT  
CTGGAAGAGGTCGTCCTGGTCAATCACGACTGGGGCTCCGCTCTGGGTTTCCACTGGGCG  
AAGCGCAATCCAGAGCGCGTCAAAGGTATTGCATTTATGGAGTTCATCCGCCCTATCCCGA  
CCTGGGACGAATGGCCAGAATTTGCCCGCGAGACCTTCCAGGCCTTCCGCACCACCGAC  
GTCGGCCGCAAGCTGATCATCGATCAGAACGTTTTATCGAGGGTACGCTGCCGATGGGT  
GTCGTCCGCCCCTGACTGAAGTCGAGATGGACCATTACCGCGAGCCGTTCTCTGAATCCT  
GTTGACCGCGAGCCACTGTGGCGCTTCCCAAACGAGCTGCCAATCGCCGGTGAGCCAGC  
GAACATCGTCGCGCTGGTCAAGAATACATGGACTGGCTGCACCAGTCCCCTGTCCCGAA  
GCTGCTGTTCTGGGGACCCCAAGCGTTCTGATCCCACCGGCCGAAGCCGCTCGCCTGG  
CCAAAAGCCTGCCTAACTGCAAGGCTGTGGACATCGGCCCGGGTCTGAATCTGCTGCAAG  
AAGACAACCCGGACCTGATCGGCAGCGAGATCGCGCGCTGGCTGTGACGCTCGAGATT  
TCCGGCCACCGGTGCAACCTTGGGTACCGCGGGGCCCGGGATCCACCGGTGCAACCTT  
GGTGAGCAAGGGCGAGGAGCTGTTACCGGGGTGGTGGCCATCCTGGTTCGAGCTGGACG  
GCGACGTAAACGGCCACAAGTTCAGCGTGTCCGGCGAGGGCGAGGGCGATGCCACCTAC

GGCAAGCTGACCCTGAAGTTCATCTGCACCACCGGCAAGCTGCCCGTGCCCTGGCCCAC  
 CCTCGTGACCACCCTGACCTACGGCGTGCAGTGCTTCAGCCGCTACCCCGACCACATGAA  
 GCAGCACGACTTCTCAAGTCCGCCATGCCCGAAGGCTACGTCCAGGAGCGCACCATCTT  
 CTTCAAGGACGACGGCAACTACAAGACCCGCGCCGAGGTGAAGTTCGAGGGCGACACCC  
 TGGTGAACCGCATCGAGCTGAAGGGCATCGACTTCAAGGAGGACGGCAACATCCTGGGG  
 CACAAGCTGGAGTACAACAGCCACAACGTCTATATCATGGCCGACAAGCAGAAGA  
 ACGGCATCAAGGTGAACTTCAAGATCCGCCACAACATCGAGGACGGCAGCGTGCAGCTCG  
 CCGACCACTACCAGCAGAACACCCCATCGGCGACGGCCCCGTGCTGCTGCCCGACAAC  
 CACTACCTGAGCACCCAGTCCGCCCTGAGCAAAGACCCCAACGAGAAGCGCGATCACATG  
 GTCCTGCTGGAGTTCGTGACCGCCGCGGGATCACTCTCGGCATGGACGAGCTGTACAA  
 GtaacaacaacaacaacaATGGTCTTCACACTCGAAGATTCGTTGGGGACTGGCGACAGACA  
 GCCGGCTACAACCTGGACCAAGTCTTGAACAGGGAGGTGTGTCCAGTTTGTTCAGAAT  
 CTCGGGGTGTCCGTAACCTCCGATCCAAAGGATTGTCTGAGCGGTGAAAATGGGCTGAAG  
 ATCGACATCCATGTCATCATCCCGTATGAAGGTCTGAGCGGCGACCAAATGGGCCAGATC  
 GAAAAATTTTTAAGGTGGTGTACCCTGTGGATGATCATCACTTTAAGGTGATCCTGCACTA  
 TGGCACACTGGTAATCGACGGGGTTACGCCGAACATGATCGACTATTTCCGACGGCCGTA  
 TGAAGGCATCGCCGTGTTTCGACGGCAAAAAGATCACTGTAACAGGGACCCTGTGGAACGG  
 CAACAAAATTATCGACGTAAGTATCAAGGTTACAAGACAGGTTTAAGGAGACCAATAGAAA  
 CTGGGCTTGTGAGACAGAGAAGACTCTTGCGTTTCTGATAGGCACCTATTGGTCTTACTG  
 ACATCCACTTTGCCTTTCTCTCCACAGGAGCGCCTGATCAACCCCGACGGCTCCCTGCTGT  
 TCCGAGTAACCATCAACGGAGTGACCGGCTGGCGGCTGTGCGAACGCATTCTGGCGGAC  
 TACAAAGACCATGACGGTGATTATAAAGATCATGACATCGATTACAAGGATGACGATGACA  
 AGTAAAGGCCGCGACTCTAGA

**pTet-Off AIO/no uORF nLuc + 3' UTR intron (Mlul/PfIMI)\_stop mutated**

ACGCGTTgctcgagcactttggccgcgaatcgcgatgtcgagttactccctatcagtgatagagaacgatgtcgagttactccct  
 atcagtgatagagaacgatgtcgagttactccctatcagtgatagagaacgatgtcgagttactccctatcagtgatagagaacgat  
 gtcgagttactccctatcagtgatagagaacgatgtcgagttactccctatcagtgatagagaacgatgtcgagttactccctatcag  
 gatagagaacgatgtcgaggttagcgtgtacgggtgggagcctataagcaGAGCTCTCTGGCTAACTAGAGAA  
 CCCACTGCTTACTGGCTTATCGAAATTAATCGACTCACTATAGGcaacaacaacaacaacaaca  
 aacaacaacaacaacaacaacaacaacaacaacaacaacaacaacaacaATGGTCTTCACACTCGAAGATTT  
 CGTTGGGGACTGGCGACAGACGCCGGCTACAACCTGGACCAAGTCTTGAACAGGGAG  
 GTGTGTCCAGTTTGTTCAGAATCTCGGGGTGTCCGTAACCTCCGATCCAAAGGATTGTCCT  
 GAGCGGTGAAAATGGGCTGAAGATCGACATCCATGTCATCATCCCGTATGAAGGTCTGAG  
 CGGCGACCAAATGGGCCAGATCGAAAAATTTTTAAGGTGGTGTACCCTGTGGATGATCAT  
 CACTTTAAGGTGATCCTGCACTATGGCACACTGGTAATCGACGGGGTTACGCCGAACATGA  
 TCGACTATTTCCGACGGCCGTATGAAGGCATCGCCGTGTTTCGACGGCAAAAAGATCACTG  
 TAACAGGGACCCTGTGGAACGGCAACAAAATTATCGACGTAAGTATCAAGGTTACAAGACA  
 GGTTTAAGGAGACCAATAGAACTGGGCTTGTGAGACAGAGAAGACTCTTGCGTTTCTGA  
 TAGGCACCTATTGGTCTTACTGACATCCACTTTGCCTTTCTCTCCACAGGAGCGCCTGATC  
 AACCCCGACGGCTCCCTGCTGTTCCGAGTAACCATCAACGGAGTGACCGGCTGGCGGCT  
 GTGCGAACGCATTCTGGCGGACTACAAAGACCATGACGGTGATTATAAAGATCATGACATC  
 GATTACAAGGATGACGATGACAAGTACGGCCGCGACTCTACAGGGCCCCGTTTTTACCCGC  
 TTTTCAGCCTCGAGCAGAAATCGGTACTGGCTTTCCATTTCGACGTAAGTATCAAGGTTACA  
 AGACAGGTTTAAGGAGACCAATAGAACTGGGCTTGTGAGACAGAGAAGACTCTTGCGTT  
 TCTGATAGGCACCTATTGGTCTTACTGACATCCACTTTGCCTTTCTCTCCACAGCCCCATTA  
 TGTGG

**pTet-Off AIO/uORF nLuc (Mlul/Xbal)\_stop mutated**

ACGCGTTgctcgagcactttggccgcgaatcgcgatgtcgagttactccctatcagtgatagagaacgatgtcgagttactccct  
 atcagtgatagagaacgatgtcgagttactccctatcagtgatagagaacgatgtcgagttactccctatcagtgatagagaacgat



GCCCTGAGCAAAGACCCCAACGAGAAGCGCGATCACATGGTCCTGCTGGAGTTCGTGACC  
GCCGCCGGGATCACTCTCGGCATGGACGAGCTGTACAAGtaccaacaacaacaacaATGGTCT  
TCACACTCGAAGATTTTCGTTGGGGACTGGCGACAGACAGCCGGCTACAACCTGGACCAAG  
TCCTTGAACAGGGAGGTGTGTCCAGTTTGTTTCAGAATCTCGGGGTGTCCGTAACCTCCGAT  
CCAAAGGATTGTCCTGAGCGGTGAAAATGGGCTGAAGATCGACATCCATGTCATCATCCC  
GTATGAAGGTCTGAGCGGCGACCAAATGGGCCAGATCGAAAAATTTTTAAGGTGGTGTAC  
CCTGTGGATGATCATCACTTTAAGGTGATCCTGCACTATGGCACACTGGTAATCGACGGGG  
TTACGCCGAACATGATCGACTATTTCCGACGGCCGTATGAAGGCATCGCCGTGTTCCGACG  
GCAAAAAGATCACTGTAACAGGGACCCTGTGGAACGGCAACAAAATTATCGACGTAAGTAT  
CAAGGTTACAAGACAGGTTTAAGGAGACCAATAGAACTGGGCTTGTGAGACAGAGAAG  
ACTCTTGCGTTTCTGATAGGCACCTATTGGTCTTACTGACATCCACTTTGCCTTTCTCTCA  
CAGGAGCGCCTGATCAACCCCGACGGCTCCCTGCTGTTCCGAGTAACCATCAACGGAGTG  
ACCGGCTGGCGGCTGTGCGAACGCATTCTGGCGGACTACAAAGACCATGACGGTGATTAT  
AAAGATCATGACATCGATTACAAGGATGACGATGACAAGTAAGGCCGCGACTCTAGA
