# Supplementary material for: Translation reinitiation after uORFs does not fully protect mRNAs from nonsense-mediated decay
Source: RNA. 2023 Jun;29(6):735–44. doi: 10.1261/rna.079525.122 (PMC10187673; doi:10.1261/rna.079525.122)
Supplement: Supplemental Material [file supp_079525.122_Supplemental_Table_3.xlsx]

## Sheet: Tani et al. (2012)
Supplemental Table 3. List of cumulative uORF length and mRNA half-life re-analyzed from Tani et al. (2012) and Maekawa et al. (2015).
uORF length (codons)	BRIQ-seq mRNA half-life (hr)	Transcript Id
0	24	NM_015665, NM_015665.6
0	8.73	NM_023928, NM_023928.5
0	6.97	NM_153698, NM_153698.2
0	17.81	NM_024684, NM_024684.4
0	13.09	NM_001087, NM_001087.5
0	8.63	NM_001605, NM_001605.3
0	5.4	NM_020745, NM_020745.4
0	12.71	NM_001261434, NM_001261434.2
0	5.48	NM_015423, NM_015423.3
0	7.58	NM_012138, NM_012138.4
0	7.78	NM_212533, NM_212533.3
0	10.09	NM_012089, NM_012089.3
0	24	NM_004299, NM_004299.6
0	6.54	NM_004996, NM_004996.4
0	16.11	NM_005845, NM_005845.5
0	7.95	NM_000033, NM_000033.4
0	11.84	NM_002858, NM_002858.4
0	5.01	NM_005050, NM_005050.4
0	12.83	NM_002940, NM_002940.3
0	6.83	NM_001025091, NM_001025091.2
0	7.24	NM_007189, NM_007189.3
0	4.46	NM_018358, NM_018358.3
0	4.68	NM_001272069, NM_001272069.2
0	11.83	NM_001177515, NM_001177515.2
0	2.44	NM_080622, NM_080622.4
0	22.81	NM_138340, NM_138340.5
0	6.3	NM_022060, NM_022060.3
0	3.58	NM_020676, NM_020676.7
0	16.52	NM_021243, NM_021243.3
0	1.7	NM_013375, NM_013375.4
0	24	NM_006111, NM_006111.3
0	7.42	NM_014384, NM_014384.3
0	12.87	NM_014049, NM_014049.5
0	10.05	NM_000017, NM_000017.4
0	6.9	NM_030649, NM_030649.3
0	24	NM_000019, NM_000019.4
0	24	NM_005891, NM_005891.3
0	3.19	NM_022735, NM_022735.4
0	9.4	NM_032360, NM_032360.4
0	14.7	NM_001082486, NM_001082486.2
0	7.45	NM_018367, NM_018367.7
0	24	NM_001096, NM_001096.3
0	24	NM_002197, NM_002197.3
0	10.7	NM_006821, NM_006821.6
0	24	NM_007274, NM_007274.4
0	14.21	NM_001037171, NM_001037171.2
0	11.27	NM_004300, NM_004300.4
0	11.23	NM_001610, NM_001610.4
0	10.34	NM_001995, NM_001995.5
0	8.21	NM_004457, NM_004457.5
0	8.51	NM_022977, NM_022977.3
0	13.03	NM_001076552, NM_001076552.3
0	24	NM_001101, NM_001101.5
0	24	NM_030812, NM_030812.3
0	12.88	NM_001130004, NM_001130004.2
0	16.12	NM_004924, NM_004924.6
0	13.55	NM_018477, NM_018477.3
0	5.59	NM_005736, NM_005736.4
0	9.69	NM_005735, NM_005735.4
0	24	NM_001005386, NM_001005386.3
0	7.38	NM_020445, NM_020445.6
0	4.19	NM_024855, NM_024855.4
0	12.08	NM_022496, NM_022496.5
0	4.27	NM_022899, NM_022899.5
0	1.91	NM_020328, NM_020328.4
0	24	NM_000666, NM_000666.3
0	6.48	NM_001107, NM_001107.5
0	24	NM_207197, NM_207197.3
0	0.9	NM_006988, NM_006988.5
0	2.1	NM_018702, NM_018702.4
0	9.23	NM_020421, NM_020421.4
0	6.24	NM_020247, NM_020247.5
0	4.58	NM_015270, NM_015270.5
0	8.38	NM_176801, NM_176801.3
0	13.18	NM_016824, NM_016824.5
0	24	NM_018269, NM_018269.4
0	4.92	NM_024551, NM_024551.3
0	24	NM_001123, NM_001123.4
0	1.56	NM_001101340, NM_001101340.2
0	1.06	NM_014913, NM_014913.4
0	4.96	NM_031284, NM_031284.5
0	2.3	NM_017825, NM_017825.3
0	5.44	NM_007002, NM_007002.4
0	24	NM_000026, NM_000026.4
0	14.73	NM_152328, NM_152328.5
0	2.26	NM_153207, NM_153207.5
0	1.14	NM_022767, NM_022767.4
0	24	NM_001130, NM_001130.6
0	3.53	NM_001134647, NM_001134647.2
0	8.56	NM_152406, NM_152406.4
0	9.06	NM_006796, NM_006796.3
0	6.6	NM_001145526, NM_001145526.3
0	7.41	NM_001135187, NM_001135187.2
0	6.76	NM_018238, NM_018238.4
0	17.88	NM_024758, NM_024758.5
0	5.9	NM_012154, NM_012154.5
0	9.27	NM_006412, NM_006412.4
0	5.83	NM_020132, NM_020132.5
0	5.4	NM_018361, NM_018361.5
0	5.1	NM_032717, NM_032717.5
0	15.64	NM_003659, NM_003659.4
0	5.14	NM_198576, NM_198576.4
0	24	NM_001040197, NM_001040197.2
0	4.15	NM_015446, NM_015446.5
0	21.83	NM_015328, NM_015328.4
0	0.45	NM_001621, NM_001621.5
0	8.08	NM_012111, NM_012111.3
0	9.82	NM_001185095, NM_001185095.2
0	4.28	NM_001198696, NM_001198696.2
0	24	NM_016108, NM_016108.4
0	6.98	NM_006303, NM_006303.4
0	15.64	NM_000476, NM_000476.3
0	17	NM_001625, NM_001625.4
0	17.39	NM_016282, NM_016282.4
0	4.62	NM_006738, NM_006738.6
0	1.9	NM_024595, NM_024595.3
0	1.84	NM_018064, NM_018064.4
0	24	NM_001628, NM_001628.4
0	24	NM_001253908, NM_001253908.2
0	24	NM_003689, NM_003689.4
0	15.62	NM_153329, NM_153329.4
0	13.08	NM_002860, NM_002860.4
0	24	NM_001034173, NM_001034173.4
0	24	NM_000690, NM_000690.4
0	24	NM_005589, NM_005589.4
0	24	NM_001182, NM_001182.5
0	17.69	NM_000696, NM_000696.4
0	24	NM_001243177, NM_001243177.4
0	24	NM_005165, NM_005165.3
0	11.99	NM_019109, NM_019109.5
0	1.11	NM_033087, NM_033087.4
0	24	NM_005787, NM_005787.6
0	24	NM_001007027, NM_001007027.3
0	1.4	NM_006020, NM_006020.3
0	1.6	NM_017621, NM_017621.4
0	24	NM_000478, NM_000478.6
0	3.25	NM_006492, NM_006492.3
0	2.19	NM_021926, NM_021926.4
0	19.7	NM_005782, NM_005782.4
0	2.2	NM_014324, NM_014324.6
0	8.1	NM_015944, NM_015944.4
0	20.58	NM_001144, NM_001144.6
0	2.5	NM_016201, NM_016201.4
0	24	NM_212557, NM_212557.4
0	24	NM_001002244, NM_001002244.2
0	5.13	NM_015391, NM_015391.4
0	5.96	NM_013366, NM_013366.4
0	5.93	NM_013367, NM_013367.3
0	24	NM_016237, NM_016237.5
0	6.83	NM_016238, NM_016238.3
0	6.36	NM_015305, NM_015305.4
0	8.08	NM_017747, NM_017747.3
0	4.03	NM_020690, NM_020690.6
0	2.06	NM_152363, NM_152363.6
0	4.38	NM_015114, NM_015114.3
0	2.67	NM_020319, NM_020319.3
0	4.5	NM_017664, NM_017664.4
0	8.55	NM_033121, NM_033121.2
0	4.43	NM_019046, NM_019046.3
0	4.45	NM_032217, NM_032217.5
0	10.13	NM_173505, NM_173505.4
0	3.98	NM_032290, NM_032290.4
0	7.49	NM_016466, NM_016466.6
0	5.82	NM_138797, NM_138797.4
0	4.61	NM_015245, NM_015245.3
0	7.51	NM_173551, NM_173551.5
0	6.05	NM_018685, NM_018685.5
0	22.14	NM_001204831, NM_001204831.3
0	13.18	NM_001204803, NM_001204803.2
0	7.49	NM_006305, NM_006305.4
0	24	NM_001150, NM_001150.3
0	23.31	NM_000700, NM_000700.3
0	24	NM_005139, NM_005139.3
0	24	NM_001153, NM_001153.5
0	24	NM_001154, NM_001154.4
0	16.03	NM_004034, NM_004034.4
0	24	NM_001127, NM_001127.4
0	3.14	NM_003917, NM_003917.5
0	7	NM_001130524, NM_001130524.2
0	21.01	NM_005498, NM_005498.5
0	24	NM_001283, NM_001283.5
0	24	NM_014203, NM_014203.3
0	7.67	NM_001242837, NM_001242837.2
0	24	NM_001030006, NM_001030006.2
0	24	NM_004069, NM_004069.6
0	15.81	NM_001261826, NM_001261826.3
0	6.1	NM_207012, NM_207012.4
0	24	NM_001284, NM_001284.4
0	3.4	NM_005829, NM_005829.5
0	3.29	NM_006594, NM_006594.5
0	4.54	NM_004722, NM_004722.4
0	1.57	NM_138368, NM_138368.5
0	4.14	NM_014855, NM_014855.3
0	24	NM_001640, NM_001640.4
0	6.58	NM_001641, NM_001641.4
0	3.15	NM_014481, NM_014481.4
0	9.73	NM_016022, NM_016022.4
0	8.61	NM_001142930, NM_001142930.2
0	17.38	NM_015957, NM_015957.4
0	6.52	NM_199294, NM_199294.3
0	24	NM_020531, NM_020531.3
0	24	NM_144772, NM_144772.3
0	24	NM_004900, NM_004900.5
0	24	NM_019101, NM_019101.3
0	24	NM_024122, NM_024122.5
0	7.4	NM_198450, NM_198450.6
0	24	NM_000484, NM_000484.4
0	3.1	NM_006380, NM_006380.5
0	7.59	NM_012096, NM_012096.3
0	5.53	NM_001251904, NM_001251904.2
0	24	NM_000485, NM_000485.3
0	10.07	NM_004925, NM_004925.5
0	9.33	NM_014691, NM_014691.3
0	6.98	NM_001655, NM_001655.5
0	11.9	NM_001659, NM_001659.3
0	15.73	NM_001660, NM_001660.4
0	24	NM_001662, NM_001662.4
0	3.13	NM_175609, NM_175609.3
0	4.44	NM_032389, NM_032389.6
0	6.03	NM_014570, NM_014570.5
0	4.82	NM_001025595, NM_001025595.3
0	7.32	NM_001242854, NM_001242854.3
0	2.98	NM_001267549, NM_001267549.3
0	19.4	NM_001172, NM_001172.4
0	1.92	NM_018011, NM_018011.4
0	4.67	NM_032900, NM_032900.6
0	4.44	NM_001199417, NM_001199417.2
0	9	NM_004706, NM_004706.4
0	5.56	NM_014629, NM_014629.4
0	5.98	NM_014448, NM_014448.4
0	3.14	NM_001162383, NM_001162383.2
0	4.26	NM_032818, NM_032818.3
0	4.86	NM_018071, NM_018071.5
0	0.43	NM_016374, NM_016374.6
0	3.97	NM_005744, NM_005744.5
0	7.31	NM_001177, NM_001177.6
0	8.4	NM_001040025, NM_001040025.3
0	24	NM_001667, NM_001667.4
0	17.93	NM_004311, NM_004311.4
0	2.3	NM_178815, NM_178815.5
0	6.86	NM_015161, NM_015161.3
0	8.52	NM_018694, NM_018694.4
0	12.74	NM_006407, NM_006407.4
0	2.81	NM_138795, NM_138795.4
0	13.6	NM_031905, NM_031905.5
0	2.83	NM_001105247, NM_001105247.2
0	5.74	NM_001199196, NM_001199196.2
0	0.32	NM_024585, NM_024585.4
0	6.35	NM_001668, NM_001668.4
0	24	NM_006409, NM_006409.4
0	22.81	NM_005720, NM_005720.4
0	24	NM_152862, NM_152862.3
0	8.24	NM_001270439, NM_001270439.2
0	6.2	NM_006628, NM_006628.6
0	11.55	NM_001257328, NM_001257328.2
0	9.14	NM_152285, NM_152285.4
0	3.25	NM_001025604, NM_001025604.3
0	24	NM_000046, NM_000046.5
0	6.72	NM_198150, NM_198150.3
0	6.2	NM_022786, NM_022786.3
0	5.17	NM_017707, NM_017707.4
0	2.49	NM_001040445, NM_001040445.3
0	3.7	NM_024701, NM_024701.4
0	2.68	NM_017873, NM_017873.4
0	5.12	NM_001198799, NM_001198799.3
0	11.01	NM_032204, NM_032204.5
0	5.14	NM_018154, NM_018154.3
0	18.17	NM_004317, NM_004317.4
0	24	NM_183356, NM_183356.4
0	21.2	NM_004318, NM_004318.4
0	8.1	NM_181718, NM_181718.4
0	4.11	NM_018136, NM_018136.5
0	8.92	NM_001251888, NM_001251888.2
0	16.35	NM_001083926, NM_001083926.2
0	24	NM_054012, NM_054012.4
0	3.37	NM_014010, NM_014010.5
0	5.01	NM_014109, NM_014109.4
0	11	NM_018188, NM_018188.5
0	9.53	NM_031921, NM_031921.6
0	7.11	NM_001001976, NM_001001976.3
0	2.02	NM_005171, NM_005171.5
0	0.94	NM_001040619, NM_001040619.3
0	16.39	NM_007348, NM_007348.4
0	24	NM_004381, NM_004381.5
0	3.58	NM_018179, NM_018179.5
0	4.9	NM_004707, NM_004707.4
0	1.65	NM_014924, NM_014924.5
0	5.72	NM_015104, NM_015104.3
0	7.83	NM_178326, NM_178326.3
0	8.46	NM_006395, NM_006395.3
0	4.47	NM_025092, NM_025092.5
0	24	NM_004044, NM_004044.7
0	3.8	NM_022374, NM_022374.5
0	6.79	NM_015459, NM_015459.5
0	3.26	NM_015251, NM_015251.3
0	24	NM_004045, NM_004045.4
0	6.25	NM_020410, NM_020410.3
0	24	NM_001160233, NM_001160233.2
0	8.66	NM_001677, NM_001677.4
0	24	NM_001679, NM_001679.4
0	13.24	NM_170665, NM_170665.4
0	24	NM_001686, NM_001686.4
0	24	NM_001001973, NM_001001973.3
0	24	NM_001687, NM_001687.5
0	24	NM_006886, NM_006886.4
0	24	NM_001688, NM_001688.5
0	24	NM_005175, NM_005175.3
0	24	NM_001002031, NM_001002031.4
0	24	NM_001190329, NM_001190329.2
0	24	NM_006356, NM_006356.3
0	24	NM_007100, NM_007100.4
0	24	NM_001003696, NM_001003696.2
0	23.5	NM_004889, NM_004889.5
0	24	NM_006476, NM_006476.5
0	24	NM_001697, NM_001697.3
0	8.78	NM_001167867, NM_001167867.2
0	24	NM_001183, NM_001183.6
0	24	NM_005765, NM_005765.3
0	24	NM_001130020, NM_001130020.3
0	9.62	NM_012463, NM_012463.4
0	24	NM_004047, NM_004047.5
0	24	NM_001694, NM_001694.4
0	21.87	NM_004691, NM_004691.5
0	7.05	NM_003945, NM_003945.4
0	24	NM_001690, NM_001690.4
0	7.42	NM_001693, NM_001693.4
0	10.71	NM_015994, NM_015994.4
0	24	NM_001198909, NM_001198909.2
0	5.71	NM_004888, NM_004888.4
0	7.18	NM_213620, NM_213620.3
0	8.59	NM_006045, NM_006045.3
0	24	NM_022745, NM_022745.6
0	8.6	NM_178191, NM_178191.3
0	8.26	NM_001184, NM_001184.4
0	20.53	NM_013236, NM_013236.4
0	9.64	NM_007245, NM_007245.4
0	2.35	NM_001136262, NM_001136262.2
0	8.19	NM_001698, NM_001698.3
0	15.26	NM_001127229, NM_001127229.2
0	4.96	NM_004217, NM_004217.4
0	10.9	NM_020371, NM_020371.3
0	24	NM_021913, NM_021913.5
0	4.86	NM_014984, NM_014984.4
0	24	NM_004048, NM_004048.4
0	10.52	NM_152490, NM_152490.5
0	2.41	NM_080605, NM_080605.4
0	13.1	NM_012200, NM_012200.4
0	6.57	NM_006876, NM_006876.3
0	6.7	NM_001009905, NM_001009905.3
0	7.42	NM_001497, NM_001497.4
0	24	NM_012105, NM_012105.5
0	8.77	NM_032989, NM_032989.3
0	2.96	NM_004282, NM_004282.4
0	0.77	NM_004281, NM_004281.4
0	2.14	NM_004874, NM_004874.4
0	24	NM_080703, NM_080703.3
0	2.21	NM_014952, NM_014952.5
0	5.09	NM_006340, NM_006340.3
0	5.72	NM_018842, NM_018842.5
0	20.78	NM_003860, NM_003860.4
0	1.49	NM_001173539, NM_001173539.2
0	1.21	NM_000465, NM_000465.4
0	4.79	NM_006317, NM_006317.5
0	5.86	NM_018664, NM_018664.3
0	7.06	NM_004324, NM_004324.4
0	4.75	NM_013448, NM_013448.3
0	5.27	NM_013449, NM_013449.4
0	12.13	NM_024649, NM_024649.5
0	13.41	NM_031885, NM_031885.5
0	8.31	NM_033028, NM_033028.5
0	1.75	NM_152384, NM_152384.3
0	11.61	NM_176824, NM_176824.3
0	13.95	NM_001008405, NM_001008405.4
0	24	NM_005745, NM_005745.8
0	5.14	NM_005872, NM_005872.3
0	7.67	NM_198799, NM_198799.4
0	15.04	NM_001190, NM_001190.4
0	10.43	NM_078469, NM_078469.3
0	24	NM_000709, NM_000709.4
0	24	NM_183050, NM_183050.4
0	6.49	NM_138639, NM_138639.2
0	4.39	NM_001270726, NM_001270726.1
0	2.09	NM_005178, NM_005178.5
0	4.59	NM_001707, NM_001707.4
0	24	NM_004765, NM_004765.4
0	24	NM_020139, NM_020139.4
0	2.56	NM_016526, NM_016526.5
0	0.87	NM_177455, NM_177455.4
0	3.73	NM_001003800, NM_001003800.2
0	9.45	NM_139343, NM_139343.3
0	2.98	NM_018688, NM_018688.6
0	8.68	NM_001012271, NM_001012271.2
0	8.24	NM_016252, NM_016252.4
0	7.68	NM_139317, NM_139317.3
0	4.81	NM_000057, NM_000057.4
0	7.14	NM_000386, NM_000386.4
0	16.14	NM_001487, NM_001487.4
0	4.5	NM_173809, NM_173809.5
0	1.1	NM_212550, NM_212550.5
0	0.76	NM_201280, NM_201280.3
0	8.29	NM_012388, NM_012388.4
0	8.46	NM_001253823, NM_001253823.2
0	24	NM_000713, NM_000713.3
0	24	NM_006129, NM_006129.5
0	4.09	NM_013979, NM_013979.3
0	3.8	NM_004330, NM_004330.4
0	20.83	NM_004052, NM_004052.4
0	13.6	NM_004331, NM_004331.3
0	5.54	NM_138369, NM_138369.3
0	4.69	NM_148894, NM_148894.3
0	2.94	NM_016074, NM_016074.5
0	17.59	NM_212552, NM_212552.3
0	12.07	NM_015201, NM_015201.5
0	9.15	NM_004332, NM_004332.4
0	9.41	NM_006085, NM_006085.6
0	3.68	NM_004333, NM_004333.6
0	2.33	NM_006768, NM_006768.5
0	5.44	NM_152743, NM_152743.4
0	7.46	NM_007300, NM_007300.4
0	5.97	NM_024332, NM_024332.4
0	7.38	NM_001173984, NM_001173984.3
0	3.44	NM_139199, NM_139199.2
0	4.52	NM_023924, NM_023924.5
0	24	NM_004899, NM_004899.5
0	3.77	NM_001519, NM_001519.4
0	1.24	NM_018310, NM_018310.4
0	24	NM_015379, NM_015379.5
0	5.7	NM_080626, NM_080626.6
0	5.1	NM_182563, NM_182563.4
0	3.29	NM_018321, NM_018321.4
0	20.54	NM_018462, NM_018462.5
0	7.9	NM_015399, NM_015399.4
0	4.96	NM_032352, NM_032352.4
0	3.21	NM_015695, NM_015695.3
0	24	NM_001728, NM_001728.4
0	15.07	NM_004335, NM_004335.4
0	16.73	NM_017797, NM_017797.4
0	7.68	NM_033271, NM_033271.3
0	24	NM_001037637, NM_001037637.2
0	3.26	NM_152265, NM_152265.5
0	4.35	NM_001130914, NM_001130914.2
0	2.42	NM_033637, NM_033637.4
0	6.88	NM_004336, NM_004336.5
0	5.39	NM_004725, NM_004725.4
0	2.81	NM_004053, NM_004053.4
0	14.98	NM_001207069, NM_001207069.2
0	17.88	NM_001159767, NM_001159767.2
0	2.42	NM_001202438, NM_001202438.2
0	6.19	NM_001136200, NM_001136200.2
0	3.59	NM_145306, NM_145306.3
0	7.15	NM_024541, NM_024541.3
0	23.71	NM_170746, NM_170746.4
0	13.73	NM_001003676, NM_001003676.3
0	10.75	NM_014267, NM_014267.6
0	1.45	NM_001135635, NM_001135635.2
0	6.62	NM_020179, NM_020179.3
0	15.46	NM_024650, NM_024650.3
0	5.5	NM_001085372, NM_001085372.3
0	3.19	NM_138471, NM_138471.3
0	16.22	NM_021640, NM_021640.4
0	3.43	NM_152261, NM_152261.4
0	5.81	NM_001009894, NM_001009894.3
0	5.23	NM_020374, NM_020374.4
0	2.58	NM_022895, NM_022895.3
0	7.48	NM_152318, NM_152318.3
0	22.81	NM_138425, NM_138425.4
0	24	NM_001145199, NM_001145199.2
0	3.12	NM_017924, NM_017924.4
0	24	NM_016039, NM_016039.3
0	0.75	NM_024644, NM_024644.5
0	3.8	NM_001134875, NM_001134875.2
0	5.81	NM_001199058, NM_001199058.2
0	3.32	NM_144597, NM_144597.3
0	24	NM_032366, NM_032366.5
0	24	NM_022744, NM_022744.4
0	5.2	NM_025108, NM_025108.3
0	1.66	NM_025187, NM_025187.5
0	4.2	NM_013242, NM_013242.3
0	2.43	NM_001012991, NM_001012991.3
0	1.24	NM_001272051, NM_001272051.2
0	24	NM_001142798, NM_001142798.3
0	4.03	NM_001193653, NM_001193653.2
0	5.19	NM_025161, NM_025161.6
0	6.46	NM_022344, NM_022344.4
0	3.58	NM_001114118, NM_001114118.3
0	12.01	NM_013326, NM_013326.5
0	24	NM_019107, NM_019107.4
0	2.48	NM_173481, NM_173481.4
0	9.23	NM_017914, NM_017914.4
0	3.5	NM_152482, NM_152482.3
0	10.66	NM_033520, NM_033520.3
0	7.43	NM_024038, NM_024038.4
0	2.51	NM_001256441, NM_001256441.2
0	3.02	NM_138358, NM_138358.4
0	11.36	NM_014047, NM_014047.3
0	0.39	NM_001039887, NM_001039887.3
0	20.04	NM_001100418, NM_001100418.2
0	24	NM_205767, NM_205767.3
0	6.32	NM_001135580, NM_001135580.2
0	24	NM_001212, NM_001212.4
0	5.05	NM_024709, NM_024709.5
0	11.82	NM_198446, NM_198446.3
0	10.5	NM_017887, NM_017887.3
0	2.7	NM_152379, NM_152379.4
0	2.82	NM_207356, NM_207356.3
0	2.99	NM_152374, NM_152374.2
0	24	NM_001242659, NM_001242659.2
0	3.33	NM_024319, NM_024319.4
0	1.03	NM_198077, NM_198077.4
0	1.53	NM_020317, NM_020317.5
0	1.92	NM_016470, NM_016470.8
0	24	NM_001199534, NM_001199534.2
0	4.94	NM_001271441, NM_001271441.2
0	9.21	NM_004649, NM_004649.8
0	8.49	NM_021254, NM_021254.4
0	12.84	NM_014306, NM_014306.5
0	5.66	NM_173793, NM_173793.5
0	4.89	NM_021925, NM_021925.4
0	4.77	NM_024520, NM_024520.3
0	7.13	NM_001013649, NM_001013649.4
0	4.13	NM_015412, NM_015412.4
0	7.36	NM_020187, NM_020187.3
0	0.79	NM_024616, NM_024616.3
0	0.63	NM_173552, NM_173552.5
0	19.8	NM_001017365, NM_001017365.3
0	8.74	NM_001001701, NM_001001701.4
0	2.25	NM_001008393, NM_001008393.4
0	10.27	NM_001145432, NM_001145432.3
0	4.82	NM_020199, NM_020199.3
0	3.95	NM_001135586, NM_001135586.1
0	4.26	NM_016175, NM_016175.4
0	5.5	NM_175921, NM_175921.6
0	2.89	NM_001161376, NM_001161376.2
0	4.78	NM_024573, NM_024573.3
0	6.42	NM_152734, NM_152734.4
0	1.63	NM_018275, NM_018275.5
0	8.08	NM_023080, NM_023080.3
0	1.35	NM_001013842, NM_001013842.3
0	3.6	NM_032847, NM_032847.3
0	8.93	NM_001001795, NM_001001795.2
0	4.75	NM_016390, NM_016390.4
0	3.3	NM_001012502, NM_001012502.3
0	12.79	NM_183241, NM_183241.3
0	3.46	NM_016481, NM_016481.5
0	24	NM_024112, NM_024112.4
0	9.99	NM_152420, NM_152420.3
0	3.39	NM_032307, NM_032307.5
0	8.52	NM_016520, NM_016520.3
0	5.35	NM_182505, NM_182505.5
0	10.32	NM_032310, NM_032310.5
0	5.39	NM_001218, NM_001218.5
0	8.08	NM_198584, NM_198584.3
0	3.38	NM_001242369, NM_001242369.2
0	5.65	NM_000725, NM_000725.4
0	5.73	NM_001080543, NM_001080543.2
0	6.93	NM_004341, NM_004341.5
0	24	NM_014333, NM_014333.4
0	7.63	NM_020898, NM_020898.3
0	6.28	NM_001261390, NM_001261390.2
0	8.35	NM_033138, NM_033138.4
0	12.8	NM_006888, NM_006888.6
0	17.01	NM_001743, NM_001743.6
0	8.72	NM_005184, NM_005184.4
0	24	NM_004343, NM_004343.4
0	4.6	NM_153498, NM_153498.4
0	5.94	NM_001221, NM_001221.4
0	5.04	NM_172171, NM_172171.3
0	5.58	NM_001744, NM_001744.6
0	2.36	NM_032294, NM_032294.3
0	16.73	NM_024766, NM_024766.5
0	3.3	NM_001745, NM_001745.4
0	24	NM_015215, NM_015215.4
0	24	NM_001746, NM_001746.4
0	24	NM_006367, NM_006367.4
0	9.22	NM_006366, NM_006366.3
0	24	NM_001747, NM_001747.4
0	24	NM_005186, NM_005186.4
0	17.3	NM_001748, NM_001748.5
0	9.54	NM_014296, NM_014296.3
0	24	NM_001749, NM_001749.4
0	6.86	NM_005898, NM_005898.5
0	21.79	NM_006135, NM_006135.3
0	12.64	NM_006136, NM_006136.3
0	4.52	NM_014550, NM_014550.4
0	4.55	NM_014316, NM_014316.4
0	2.96	NM_018210, NM_018210.4
0	18.67	NM_199141, NM_199141.2
0	7.61	NM_001194997, NM_001194997.2
0	24	NM_024537, NM_024537.4
0	5.05	NM_007359, NM_007359.5
0	24	NM_138423, NM_138423.4
0	24	NM_003688, NM_003688.3
0	6.03	NM_020764, NM_020764.4
0	5.68	NM_001226, NM_001226.4
0	4.1	NM_001080125, NM_001080125.2
0	24	NM_001752, NM_001752.4
0	10.94	NM_001172896, NM_001172896.2
0	8.53	NM_001755, NM_001755.3
0	5.19	NM_005188, NM_005188.4
0	2.63	NM_170662, NM_170662.5
0	0.34	NM_024814, NM_024814.4
0	5.18	NM_001757, NM_001757.4
0	1.61	NM_005189, NM_005189.3
0	8.31	NM_007276, NM_007276.5
0	1.13	NM_003655, NM_003655.3
0	11.14	NM_012117, NM_012117.3
0	6.06	NM_017721, NM_017721.5
0	4.87	NM_032449, NM_032449.3
0	24	NM_004059, NM_004059.5
0	3.69	NM_138414, NM_138414.3
0	24	NM_080667, NM_080667.7
0	8.86	NM_032357, NM_032357.4
0	0.75	NM_173510, NM_173510.4
0	1.42	NM_145265, NM_145265.3
0	4.65	NM_024821, NM_024821.5
0	3.01	NM_199287, NM_199287.3
0	4.87	NM_199342, NM_199342.4
0	9.01	NM_018246, NM_018246.3
0	8.63	NM_080654, NM_080654.3
0	5.48	NM_144609, NM_144609.3
0	11.51	NM_020198, NM_020198.3
0	6.33	NM_178335, NM_178335.3
0	3.18	NM_001256964, NM_001256964.2
0	4.36	NM_198082, NM_198082.4
0	9.74	NM_001017928, NM_001017928.4
0	4.3	NM_014167, NM_014167.5
0	9.75	NM_005436, NM_005436.5
0	1.72	NM_001130147, NM_001130147.2
0	5.18	NM_024098, NM_024098.4
0	4.7	NM_001080414, NM_001080414.4
0	3.87	NM_015603, NM_015603.3
0	2.07	NM_019044, NM_019044.5
0	3.84	NM_018074, NM_018074.6
0	3.15	NM_052848, NM_052848.3
0	4.52	NM_001237, NM_001237.5
0	6.31	NM_031966, NM_031966.4
0	13.39	NM_004701, NM_004701.4
0	3.56	NM_053056, NM_053056.3
0	11.57	NM_001760, NM_001760.5
0	12.68	NM_012142, NM_012142.5
0	2.87	NM_001238, NM_001238.4
0	2.2	NM_001761, NM_001761.3
0	10.94	NM_004060, NM_004060.4
0	1.07	NM_020307, NM_020307.4
0	1.57	NM_030937, NM_030937.6
0	0.3	NM_001240, NM_001240.4
0	7.88	NM_001142300, NM_001142300.2
0	1.02	NM_012118, NM_012118.4
0	9.16	NM_005125, NM_005125.2
0	16.42	NM_005998, NM_005998.5
0	17.47	NM_006430, NM_006430.4
0	23.06	NM_012073, NM_012073.5
0	12.22	NM_001762, NM_001762.4
0	24	NM_006585, NM_006585.4
0	24	NM_133493, NM_133493.5
0	24	NM_004357, NM_004357.5
0	7.65	NM_006016, NM_006016.6
0	19.26	NM_001024736, NM_001024736.2
0	24	NM_016579, NM_016579.4
0	2.52	NM_012099, NM_012099.3
0	20.39	NM_000610, NM_000610.4
0	24	NM_001777, NM_001777.4
0	20.81	NM_001114752, NM_001114752.3
0	5.99	NM_001144822, NM_001144822.2
0	11.04	NM_203329, NM_203329.3
0	24	NM_001251, NM_001251.3
0	24	NM_004356, NM_004356.4
0	12.38	NM_002231, NM_002231.4
0	4.04	NM_004233, NM_004233.4
0	24	NM_001769, NM_001769.4
0	9.01	NM_001242614, NM_001242614.2
0	24	NM_001785, NM_001785.3
0	3.38	NM_138477, NM_138477.4
0	13.33	NM_006023, NM_006023.3
0	6.77	NM_001078645, NM_001078645.3
0	8.12	NM_001255, NM_001255.3
0	6.15	NM_004661, NM_004661.4
0	1.69	NM_001789, NM_001789.3
0	7.1	NM_021873, NM_021873.4
0	4.49	NM_001790, NM_001790.5
0	5	NM_004359, NM_004359.2
0	24	NM_007065, NM_007065.4
0	0.35	NM_017913, NM_017913.4
0	4.08	NM_015891, NM_015891.3
0	16.92	NM_001039802, NM_001039802.2
0	1.42	NM_006779, NM_006779.4
0	14.31	NM_003504, NM_003504.5
0	4.88	NM_001253, NM_001253.4
0	3.68	NM_001254, NM_001254.4
0	4.96	NM_024529, NM_024529.5
0	2.44	NM_152562, NM_152562.4
0	4.04	NM_031299, NM_031299.7
0	1.96	NM_017955, NM_017955.4
0	2.61	NM_080668, NM_080668.4
0	2.93	NM_031942, NM_031942.5
0	2.39	NM_001256875, NM_001256875.2
0	24	NM_001792, NM_001792.5
0	5.45	NM_001199054, NM_001199054.2
0	4.82	NM_001786, NM_001786.5
0	5.66	NM_052988, NM_052988.5
0	5.92	NM_024011, NM_024011.4
0	5.55	NM_001798, NM_001798.5
0	3.36	NM_001039803, NM_001039803.3
0	24	NM_004642, NM_004642.4
0	21.34	NM_004935, NM_004935.4
0	13.37	NM_176096, NM_176096.3
0	5.47	NM_001799, NM_001799.4
0	2.43	NM_001261, NM_001261.4
0	0.44	NM_004064, NM_004064.5
0	7	NM_001122630, NM_001122630.2
0	24	NM_058197, NM_058197.5
0	1.18	NM_017632, NM_017632.4
0	13.73	NM_080656, NM_080656.3
0	2.68	NM_001800, NM_001800.4
0	24	NM_005192, NM_005192.4
0	2.98	NM_207327, NM_207327.5
0	7.01	NM_003818, NM_003818.4
0	3.54	NM_030928, NM_030928.4
0	3.68	NM_001134422, NM_001134422.2
0	3.36	NM_152342, NM_152342.4
0	0.98	NM_005194, NM_005194.4
0	1.36	NM_005195, NM_005195.4
0	11.01	NM_033070, NM_033070.3
0	6.46	NM_001172640, NM_001172640.2
0	4.19	NM_001810, NM_001810.6
0	24	NM_022909, NM_022909.4
0	14.37	NM_024053, NM_024053.5
0	24	NM_181716, NM_181716.3
0	11.09	NM_001012507, NM_001012507.4
0	3.11	NM_153223, NM_153223.4
0	2.78	NM_001194998, NM_001194998.2
0	8.1	NM_032142, NM_032142.4
0	4.65	NM_018718, NM_018718.3
0	4.18	NM_018140, NM_018140.4
0	4.14	NM_024899, NM_024899.4
0	2.26	NM_022778, NM_022778.5
0	5.33	NM_138363, NM_138363.3
0	8.7	NM_001007794, NM_001007794.3
0	23.29	NM_016174, NM_016174.5
0	6.86	NM_022766, NM_022766.6
0	7.56	NM_147190, NM_147190.5
0	15.96	NM_001256126, NM_001256126.2
0	2.79	NM_024922, NM_024922.6
0	24	NM_004344, NM_004344.3
0	4.54	NM_004365, NM_004365.4
0	24	NM_001928, NM_001928.4
0	24	NM_005507, NM_005507.3
0	24	NM_001252383, NM_001252383.2
0	12.86	NM_001166239, NM_001166239.2
0	4.78	NM_006568, NM_006568.3
0	3.83	NM_001008708, NM_001008708.4
0	4.09	NM_005483, NM_005483.3
0	4.42	NM_005441, NM_005441.3
0	8.05	NM_203298, NM_203298.3
0	24	NM_213720, NM_213720.3
0	24	NM_016139, NM_016139.4
0	8.24	NM_017812, NM_017812.4
0	24	NM_032309, NM_032309.4
0	8	NM_032343, NM_032343.3
0	12.88	NM_004284, NM_004284.6
0	14.73	NM_001273, NM_001273.5
0	2.02	NM_032221, NM_032221.5
0	8.63	NM_001005735, NM_001005735.2
0	5.55	NM_006387, NM_006387.6
0	6.29	NM_001277, NM_001277.3
0	0.64	NM_005198, NM_005198.5
0	5.68	NM_002768, NM_002768.5
0	2.68	NM_020412, NM_020412.5
0	24	NM_198426, NM_198426.3
0	9.01	NM_014043, NM_014043.4
0	24	NM_016079, NM_016079.4
0	8.24	NM_014169, NM_014169.5
0	9.25	NM_176812, NM_176812.5
0	11.58	NM_016410, NM_016410.6
0	4.93	NM_024591, NM_024591.5
0	6.11	NM_012124, NM_012124.3
0	24	NM_007236, NM_007236.5
0	12.72	NM_024536, NM_024536.6
0	24	NM_020244, NM_020244.3
0	9.33	NM_017444, NM_017444.6
0	6.06	NM_130468, NM_130468.4
0	10.03	NM_022092, NM_022092.3
0	3.42	NM_001039690, NM_001039690.5
0	3.23	NM_001206612, NM_001206612.2
0	8.89	NM_001278, NM_001278.5
0	6.19	NM_145165, NM_145165.4
0	9.68	NM_001202559, NM_001202559.1
0	5.41	NM_004804, NM_004804.3
0	6.7	NM_020313, NM_020313.4
0	24	NM_006384, NM_006384.4
0	12	NM_032630, NM_032630.3
0	6.78	NM_001280, NM_001280.3
0	9.38	NM_032830, NM_032830.3
0	10.69	NM_018464, NM_018464.5
0	10.45	NM_001008388, NM_001008388.5
0	14.09	NM_001136498, NM_001136498.2
0	6.43	NM_001206999, NM_001206999.2
0	3.28	NM_001098525, NM_001098525.3
0	2.92	NM_152515, NM_152515.5
0	8.62	NM_006825, NM_006825.4
0	11.31	NM_001008938, NM_001008938.4
0	24	NM_001823, NM_001823.5
0	11.82	NM_001826, NM_001826.3
0	9.19	NM_001827, NM_001827.3
0	10.81	NM_015097, NM_015097.3
0	5.77	NM_007056, NM_007056.3
0	3.18	NM_004366, NM_004366.6
0	1.28	NM_001286, NM_001286.5
0	10.15	NM_001287, NM_001287.6
0	16.72	NM_001288, NM_001288.5
0	17.39	NM_013943, NM_013943.3
0	5.9	NM_001195555, NM_001195555.2
0	0.26	NM_003993, NM_003993.4
0	4.26	NM_001130028, NM_001130028.2
0	11.61	NM_006493, NM_006493.4
0	18.56	NM_017882, NM_017882.3
0	12.15	NM_001293, NM_001293.3
0	0.96	NM_006831, NM_006831.3
0	24	NM_006012, NM_006012.4
0	24	NM_001294, NM_001294.4
0	5.34	NM_006660, NM_006660.5
0	5.77	NM_022111, NM_022111.4
0	10.05	NM_001009566, NM_001009566.3
0	24	NM_007096, NM_007096.4
0	21.2	NM_007097, NM_007097.5
0	24	NM_004859, NM_004859.4
0	6.15	NM_007098, NM_007098.4
0	24	NM_001831, NM_001831.4
0	2.47	NM_015041, NM_015041.3
0	7.3	NM_015229, NM_015229.4
0	11.51	NM_138809, NM_138809.4
0	3.52	NM_182523, NM_182523.2
0	6.75	NM_020188, NM_020188.5
0	11.28	NM_016308, NM_016308.3
0	14.79	NM_017801, NM_017801.3
0	7.25	NM_138410, NM_138410.4
0	7.09	NM_001127192, NM_001127192.2
0	9.92	NM_018235, NM_018235.3
0	19.56	NM_005776, NM_005776.3
0	22.81	NM_014184, NM_014184.4
0	10.87	NM_004368, NM_004368.4
0	9.77	NM_001839, NM_001839.5
0	7.09	NM_017623, NM_017623.5
0	3.7	NM_020184, NM_020184.4
0	6.14	NM_017546, NM_017546.5
0	5.54	NM_033133, NM_033133.5
0	5.75	NM_015680, NM_015680.6
0	24	NM_014255, NM_014255.7
0	14.18	NM_006586, NM_006586.5
0	9.69	NM_152755, NM_152755.2
0	8.77	NM_001040431, NM_001040431.3
0	5.19	NM_018714, NM_018714.3
0	3.17	NM_031431, NM_031431.4
0	17.29	NM_015386, NM_015386.3
0	12.14	NM_001161520, NM_001161520.2
0	5.63	NM_153603, NM_153603.4
0	2.66	NM_032382, NM_032382.5
0	0.48	NM_004645, NM_004645.3
0	5.55	NM_001856, NM_001856.4
0	18.06	NM_001845, NM_001845.6
0	11.19	NM_001848, NM_001848.3
0	5.25	NM_000094, NM_000094.4
0	3.48	NM_001853, NM_001853.4
0	6.24	NM_152516, NM_152516.4
0	24	NM_016144, NM_016144.4
0	6.76	NM_016094, NM_016094.4
0	10.65	NM_012071, NM_012071.4
0	24	NM_017828, NM_017828.5
0	18.48	NM_053041, NM_053041.3
0	24	NM_017845, NM_017845.5
0	12.47	NM_014186, NM_014186.4
0	12.91	NM_144589, NM_144589.4
0	24	NM_001098398, NM_001098398.2
0	18.4	NM_004766, NM_004766.3
0	24	NM_007263, NM_007263.4
0	23.48	NM_016128, NM_016128.4
0	24	NM_012133, NM_012133.6
0	14.08	NM_018405, NM_018405.4
0	5.37	NM_001143887, NM_001143887.2
0	15.69	NM_003653, NM_003653.4
0	12.61	NM_016129, NM_016129.3
0	24	NM_006833, NM_006833.5
0	4.5	NM_144576, NM_144576.4
0	2.73	NM_025147, NM_025147.5
0	11.25	NM_017421, NM_017421.4
0	10.52	NM_016035, NM_016035.5
0	7.1	NM_032314, NM_032314.4
0	24	NM_182480, NM_182480.3
0	7.83	NM_016138, NM_016138.5
0	8.59	NM_020312, NM_020312.4
0	5.29	NM_052820, NM_052820.4
0	24	NM_021149, NM_021149.5
0	13.18	NM_004375, NM_004375.5
0	10.45	NM_078470, NM_078470.6
0	13.94	NM_005694, NM_005694.2
0	1.32	NM_001031617, NM_001031617.3
0	24	NM_001861, NM_001861.6
0	24	NM_004255, NM_004255.4
0	24	NM_001862, NM_001862.3
0	24	NM_004373, NM_004373.4
0	24	NM_001863, NM_001863.5
0	4.84	NM_144613, NM_144613.5
0	24	NM_004374, NM_004374.4
0	24	NM_001866, NM_001866.3
0	24	NM_001867, NM_001867.3
0	24	NM_004074, NM_004074.3
0	24	NM_001873, NM_001873.4
0	24	NM_003909, NM_003909.5
0	5.36	NM_014427, NM_014427.5
0	7.01	NM_153634, NM_153634.3
0	5.56	NM_000097, NM_000097.7
0	6.16	NM_018340, NM_018340.3
0	10.69	NM_013291, NM_013291.3
0	3.14	NM_006693, NM_006693.4
0	8.83	NM_007007, NM_007007.3
0	2.77	NM_024811, NM_024811.4
0	14.33	NM_001876, NM_001876.4
0	3.92	NM_000098, NM_000098.3
0	24	NM_019029, NM_019029.3
0	22.79	NM_001199723, NM_001199723.2
0	5.22	NM_016302, NM_016302.4
0	2.36	NM_014478, NM_014478.5
0	17.58	NM_006368, NM_006368.5
0	1.73	NM_001039618, NM_001039618.4
0	24	NM_003851, NM_003851.3
0	24	NM_001135101, NM_001135101.3
0	4.04	NM_183011, NM_183011.2
0	9.19	NM_016441, NM_016441.3
0	24	NM_001311, NM_001311.5
0	8.87	NM_014171, NM_014171.6
0	2.5	NM_016823, NM_016823.4
0	4.58	NM_015986, NM_015986.4
0	5.05	NM_016652, NM_016652.6
0	24	NM_006371, NM_006371.5
0	4.72	NM_181715, NM_181715.3
0	3.45	NM_022769, NM_022769.5
0	24	NM_004077, NM_004077.3
0	24	NM_003651, NM_003651.5
0	4.15	NM_152221, NM_152221.3
0	7.21	NM_001896, NM_001896.4
0	24	NM_001320, NM_001320.7
0	19.23	NM_001321, NM_001321.3
0	24	NM_000099, NM_000099.4
0	20.09	NM_000100, NM_000100.4
0	0.46	NM_001033522, NM_001033522.2
0	7.05	NM_001325, NM_001325.3
0	1.62	NM_015235, NM_015235.3
0	4.95	NM_001326, NM_001326.3
0	6.15	NM_001247989, NM_001247989.2
0	2.55	NM_025099, NM_025099.6
0	3.57	NM_048368, NM_048368.4
0	4.85	NM_001902, NM_001902.6
0	3.81	NM_001142397, NM_001142397.2
0	24	NM_001903, NM_001903.5
0	24	NM_003798, NM_003798.4
0	24	NM_001904, NM_001904.4
0	9.09	NM_030877, NM_030877.5
0	5.15	NM_014633, NM_014633.5
0	7.7	NM_001907, NM_001907.3
0	24	NM_000308, NM_000308.4
0	24	NM_148170, NM_148170.5
0	24	NM_001909, NM_001909.5
0	24	NM_003793, NM_003793.4
0	24	NM_001912, NM_001912.5
0	24	NM_001336, NM_001336.4
0	1.92	NM_145232, NM_145232.4
0	7.04	NM_001012759, NM_001012759.3
0	24	NM_024040, NM_024040.3
0	7.38	NM_001198777, NM_001198777.2
0	12.03	NM_001008895, NM_001008895.4
0	5.37	NM_001168370, NM_001168370.2
0	3.2	NM_015089, NM_015089.4
0	6.88	NM_015960, NM_015960.3
0	0.42	NM_017748, NM_017748.5
0	8.89	NM_018294, NM_018294.6
0	10.22	NM_001338, NM_001338.5
0	0.47	NM_003467, NM_003467.3
0	5.66	NM_001101654, NM_001101654.2
0	4.87	NM_144970, NM_144970.3
0	4.5	NM_001017978, NM_001017978.4
0	1.88	NM_001134404, NM_001134404.2
0	8.37	NM_030579, NM_030579.3
0	9.95	NM_016243, NM_016243.3
0	24	NM_016230, NM_016230.4
0	24	NM_000101, NM_000101.4
0	24	NM_001916, NM_001916.5
0	9.03	NM_018947, NM_018947.6
0	24	NM_014608, NM_014608.6
0	5.21	NM_177538, NM_177538.3
0	8.28	NM_030622, NM_030622.8
0	9.68	NM_000786, NM_000786.4
0	5.63	NM_001554, NM_001554.5
0	21.64	NM_032412, NM_032412.4
0	3.03	NM_004762, NM_004762.6
0	4.34	NM_017457, NM_017457.6
0	4.25	NM_004227, NM_004227.4
0	7.68	NM_152783, NM_152783.5
0	24	NM_001344, NM_001344.4
0	3.48	NM_139179, NM_139179.4
0	10.5	NM_004394, NM_004394.3
0	14.15	NM_004632, NM_004632.4
0	3.53	NM_001348, NM_001348.3
0	12.2	NM_001349, NM_001349.4
0	10.53	NM_170711, NM_170711.3
0	16	NM_014764, NM_014764.4
0	8.66	NM_001122956, NM_001122956.2
0	2.78	NM_016216, NM_016216.4
0	6.43	NM_001918, NM_001918.5
0	12.98	NM_015420, NM_015420.7
0	4.75	NM_138353, NM_138353.4
0	3.43	NM_015604, NM_015604.4
0	5.13	NM_005828, NM_005828.5
0	4.49	NM_015726, NM_015726.4
0	3.5	NM_173674, NM_173674.3
0	6.55	NM_000788, NM_000788.3
0	2.02	NM_018403, NM_018403.7
0	15.19	NM_014026, NM_014026.6
0	10.87	NM_001012732, NM_001012732.2
0	22.77	NM_006400, NM_006400.5
0	24	NM_024348, NM_024348.4
0	3.79	NM_032486, NM_032486.4
0	10.75	NM_006571, NM_006571.4
0	5.94	NM_024096, NM_024096.2
0	4.71	NM_020640, NM_020640.4
0	3.65	NM_001014283, NM_001014283.2
0	5.18	NM_001040402, NM_001040402.3
0	6.7	NM_032299, NM_032299.4
0	24	NM_016286, NM_016286.4
0	4.49	NM_024050, NM_024050.6
0	5.79	NM_012137, NM_012137.4
0	24	NM_001923, NM_001923.5
0	3.38	NM_032341, NM_032341.5
0	0.68	NM_019058, NM_019058.4
0	1.23	NM_015086, NM_015086.2
0	24	NM_005216, NM_005216.5
0	24	NM_001355, NM_001355.4
0	24	NM_004939, NM_004939.3
0	4.28	NM_030653, NM_030653.4
0	6.59	NM_001098504, NM_001098504.2
0	6.91	NM_006773, NM_006773.4
0	5.58	NM_018332, NM_018332.5
0	1.65	NM_007204, NM_007204.5
0	5.25	NM_004728, NM_004728.4
0	6.4	NM_020414, NM_020414.4
0	7.24	NM_017895, NM_017895.8
0	3.69	NM_022779, NM_022779.9
0	17.62	NM_005804, NM_005804.4
0	24	NM_004640, NM_004640.7
0	6.95	NM_001193416, NM_001193416.3
0	3.72	NM_203499, NM_203499.3
0	5.53	NM_016355, NM_016355.4
0	14.58	NM_019070, NM_019070.5
0	6.12	NM_004396, NM_004396.5
0	6.8	NM_024045, NM_024045.2
0	5.86	NM_175066, NM_175066.4
0	7.08	NM_007010, NM_007010.5
0	9.36	NM_001111322, NM_001111322.2
0	4.17	NM_020936, NM_020936.3
0	5.75	NM_019082, NM_019082.4
0	4.71	NM_001257191, NM_001257191.3
0	6	NM_021008, NM_021008.4
0	24	NM_001359, NM_001359.2
0	19.69	NM_020664, NM_020664.4
0	1.29	NM_001270614, NM_001270614.2
0	4.76	NM_003676, NM_003676.4
0	8.05	NM_003472, NM_003472.4
0	6.97	NM_152678, NM_152678.3
0	5.21	NM_018369, NM_018369.3
0	24	NM_015954, NM_015954.4
0	6.76	NM_024295, NM_024295.6
0	7.41	NM_016041, NM_016041.5
0	9.35	NM_015704, NM_015704.3
0	5.91	NM_004401, NM_004401.3
0	4.34	NM_004402, NM_004402.4
0	11.37	NM_004403, NM_004403.3
0	24	NM_012079, NM_012079.6
0	2.4	NM_022719, NM_022719.3
0	5.11	NM_152879, NM_152879.3
0	8.81	NM_001105540, NM_001105540.2
0	16.76	NM_080916, NM_080916.3
0	11.56	NM_014762, NM_014762.4
0	13.93	NM_001360, NM_001360.3
0	24	NM_138452, NM_138452.3
0	7.58	NM_144683, NM_144683.4
0	24	NM_021004, NM_021004.4
0	8.68	NM_198083, NM_198083.4
0	24	NM_016029, NM_016029.4
0	7.87	NM_015510, NM_015510.5
0	7.11	NM_001358, NM_001358.3
0	5.65	NM_020162, NM_020162.4
0	3.79	NM_021931, NM_021931.4
0	5.01	NM_020865, NM_020865.3
0	7	NM_032656, NM_032656.4
0	10.04	NM_024612, NM_024612.5
0	5.44	NM_198963, NM_198963.3
0	5.69	NM_004941, NM_004941.3
0	16.72	NM_005219, NM_005219.5
0	1.9	NM_014388, NM_014388.7
0	7.04	NM_014473, NM_014473.4
0	10.66	NM_032839, NM_032839.3
0	4.43	NM_014953, NM_014953.5
0	6.63	NM_001143688, NM_001143688.3
0	8.86	NM_001363, NM_001363.5
0	14.42	NM_001931, NM_001931.5
0	17.8	NM_000108, NM_000108.5
0	3.56	NM_021120, NM_021120.4
0	9.95	NM_001146015, NM_001146015.2
0	7.12	NM_001933, NM_001933.5
0	7.11	NM_019100, NM_019100.5
0	2.1	NM_007329, NM_007329.3
0	24	NM_033317, NM_033317.5
0	5.56	NM_004943, NM_004943.2
0	1.24	NM_018139, NM_018139.3
0	6.63	NM_001539, NM_001539.4
0	6.47	NM_005880, NM_005880.4
0	5.13	NM_005147, NM_005147.6
0	5.44	NM_018602, NM_018602.4
0	0.71	NM_006145, NM_006145.3
0	24	NM_016306, NM_016306.6
0	4.96	NM_001002762, NM_001002762.5
0	0.37	NM_007034, NM_007034.5
0	4.89	NM_058246, NM_058246.4
0	9.64	NM_022365, NM_022365.4
0	6.48	NM_018198, NM_018198.4
0	24	NM_013238, NM_013238.3
0	2.93	NM_015291, NM_015291.4
0	4.5	NM_018163, NM_018163.3
0	13.63	NM_001015882, NM_001015882.3
0	7.26	NM_006260, NM_006260.5
0	4.23	NM_025219, NM_025219.3
0	11.32	NM_014280, NM_014280.3
0	4.28	NM_015190, NM_015190.5
0	1.47	NM_001374, NM_001374.3
0	3.45	NM_194249, NM_194249.3
0	24	NM_139072, NM_139072.4
0	10.48	NM_001080849, NM_001080849.3
0	24	NM_001005336, NM_001005336.3
0	9.12	NM_012062, NM_012062.5
0	3.23	NM_015221, NM_015221.4
0	12.03	NM_001130823, NM_001130823.3
0	4.93	NM_006892, NM_006892.4
0	23.99	NM_199184, NM_199184.2
0	6.91	NM_052951, NM_052951.3
0	3.31	NM_014597, NM_014597.5
0	24	NM_020812, NM_020812.4
0	2.89	NM_024872, NM_024872.4
0	3.8	NM_020438, NM_020438.5
0	7.25	NM_017613, NM_017613.4
0	24	NM_001382, NM_001382.4
0	24	NM_015448, NM_015448.3
0	3.51	NM_006268, NM_006268.5
0	5.47	NM_001077394, NM_001077394.2
0	11.45	NM_003859, NM_003859.3
0	10.78	NM_003863, NM_003863.4
0	10.03	NM_018973, NM_018973.4
0	24	NM_130443, NM_130443.4
0	24	NM_013379, NM_013379.3
0	16.43	NM_015283, NM_015283.2
0	11.53	NM_181787, NM_181787.3
0	13.3	NM_000110, NM_000110.4
0	11.96	NM_001197293, NM_001197293.3
0	24	NM_001197294, NM_001197294.2
0	7.18	NM_018370, NM_018370.3
0	24	NM_006442, NM_006442.4
0	11.26	NM_004147, NM_004147.4
0	10.07	NM_001388, NM_001388.5
0	7.41	NM_024094, NM_024094.3
0	4.1	NM_006052, NM_006052.2
0	24	NM_001943, NM_001943.5
0	2.99	NM_015548, NM_015548.5
0	3.02	NM_015375, NM_015375.3
0	24	NM_080820, NM_080820.6
0	2.36	NM_016448, NM_016448.4
0	7.92	NM_021907, NM_021907.5
0	3.49	NM_183040, NM_183040.2
0	13.55	NM_012145, NM_012145.4
0	11.4	NM_022156, NM_022156.5
0	3.04	NM_017803, NM_017803.5
0	0.95	NM_004417, NM_004417.4
0	2.94	NM_003584, NM_003584.2
0	8.39	NM_007240, NM_007240.3
0	0.83	NM_004418, NM_004418.4
0	9.15	NM_020185, NM_020185.6
0	24	NM_017823, NM_017823.5
0	4.81	NM_004090, NM_004090.4
0	1.61	NM_001947, NM_001947.4
0	8.88	NM_001395, NM_001395.4
0	24	NM_001025248, NM_001025248.2
0	5.32	NM_004422, NM_004422.3
0	6.99	NM_004423, NM_004423.4
0	15.92	NM_001376, NM_001376.5
0	15.46	NM_001378, NM_001378.3
0	7.67	NM_016141, NM_016141.4
0	6.05	NM_006141, NM_006141.3
0	2.43	NM_080677, NM_080677.3
0	16.48	NM_014183, NM_014183.4
0	9.96	NM_006519, NM_006519.4
0	24	NM_006520, NM_006520.3
0	4.15	NM_003845, NM_003845.3
0	1.6	NM_001949, NM_001949.5
0	5.63	NM_001950, NM_001950.4
0	3.28	NM_001951, NM_001951.4
0	3	NM_004424, NM_004424.5
0	1.22	NM_033083, NM_033083.7
0	4.89	NM_018453, NM_018453.4
0	6.16	NM_001083614, NM_001083614.2
0	18.27	NM_006824, NM_006824.3
0	7.48	NM_007265, NM_007265.3
0	4.83	NM_014693, NM_014693.4
0	24	NM_001398, NM_001398.3
0	24	NM_004092, NM_004092.4
0	13.84	NM_001919, NM_001919.4
0	17.54	NM_001166010, NM_001166010.2
0	11.12	NM_014329, NM_014329.5
0	14.38	NM_153200, NM_153200.3
0	3.68	NM_001957, NM_001957.4
0	4.25	NM_003797, NM_003797.5
0	24	NM_001402, NM_001402.6
0	24	NM_001958, NM_001958.5
0	23.56	NM_001037663, NM_001037663.2
0	7.27	NM_004280, NM_004280.5
0	24	NM_001404, NM_001404.5
0	16.92	NM_001961, NM_001961.4
0	5	NM_013302, NM_013302.5
0	5.06	NM_021937, NM_021937.5
0	7.81	NM_145231, NM_145231.4
0	7.09	NM_001143943, NM_001143943.1
0	24	NM_001039348, NM_001039348.3
0	5.69	NM_024329, NM_024329.6
0	1.15	NM_004428, NM_004428.3
0	1.78	NM_005227, NM_005227.3
0	4.77	NM_001962, NM_001962.3
0	5.54	NM_024580, NM_024580.6
0	3.1	NM_001205301, NM_001205301.2
0	7.69	NM_005228, NM_005228.5
0	3.16	NM_006795, NM_006795.4
0	5.39	NM_014601, NM_014601.4
0	4.79	NM_139265, NM_139265.4
0	5.5	NM_024757, NM_024757.5
0	9.53	NM_006709, NM_006709.5
0	6.69	NM_014335, NM_014335.3
0	7.28	NM_005801, NM_005801.4
0	0.36	NM_001242481, NM_001242481.2
0	9.84	NM_001412, NM_001412.4
0	7.03	NM_005875, NM_005875.3
0	10.04	NM_032025, NM_032025.5
0	24	NM_014413, NM_014413.4
0	9.34	NM_001013703, NM_001013703.4
0	15.44	NM_001414, NM_001414.4
0	7.44	NM_014239, NM_014239.4
0	14.5	NM_020365, NM_020365.5
0	9.39	NM_172195, NM_172195.4
0	6.82	NM_003907, NM_003907.3
0	24	NM_001415, NM_001415.4
0	4.69	NM_003750, NM_003750.4
0	15.13	NM_003753, NM_003753.4
0	18.24	NM_001568, NM_001568.3
0	24	NM_003754, NM_003754.3
0	21.04	NM_003755, NM_003755.5
0	24	NM_003756, NM_003756.3
0	7.83	NM_003758, NM_003758.4
0	24	NM_013234, NM_013234.4
0	24	NM_016091, NM_016091.4
0	16.04	NM_006360, NM_006360.6
0	15.66	NM_001416, NM_001416.4
0	3.17	NM_001967, NM_001967.4
0	6.3	NM_014740, NM_014740.4
0	9.59	NM_001417, NM_001417.7
0	5.3	NM_004846, NM_004846.4
0	16.46	NM_004095, NM_004095.4
0	5.84	NM_004096, NM_004096.5
0	12.75	NM_022170, NM_022170.2
0	14.98	NM_002212, NM_002212.4
0	9.41	NM_001419, NM_001419.3
0	6.17	NM_032377, NM_032377.4
0	10.66	NM_001256399, NM_001256399.2
0	12.14	NM_001242828, NM_001242828.2
0	8.89	NM_001242875, NM_001242875.3
0	6.29	NM_018091, NM_018091.6
0	6.68	NM_019040, NM_019040.5
0	24	NM_175063, NM_175063.6
0	5	NM_014673, NM_014673.5
0	16.15	NM_018447, NM_018447.4
0	22.79	NM_016454, NM_016454.4
0	21.96	NM_020154, NM_020154.3
0	5.38	NM_006067, NM_006067.5
0	2.38	NM_001166131, NM_001166131.2
0	7.61	NM_006331, NM_006331.8
0	8.73	NM_001008707, NM_001008707.2
0	10.19	NM_153265, NM_153265.3
0	15.72	NM_001424, NM_001424.6
0	24	NM_001425, NM_001425.3
0	6.41	NM_015036, NM_015036.3
0	24	NM_004435, NM_004435.2
0	4.13	NM_173627, NM_173627.5
0	3.29	NM_001042573, NM_001042573.3
0	6.71	NM_032140, NM_032140.3
0	24	NM_001976, NM_001976.5
0	14.08	NM_021204, NM_021204.5
0	16.11	NM_202758, NM_202758.5
0	24	NM_006208, NM_006208.3
0	13.53	NM_207043, NM_207043.2
0	4	NM_144679, NM_144679.3
0	24	NM_020189, NM_020189.6
0	13.61	NM_001431, NM_001431.4
0	6.68	NM_019114, NM_019114.5
0	3.93	NM_017549, NM_017549.5
0	6.89	NM_004431, NM_004431.5
0	10.64	NM_017449, NM_017449.5
0	24	NM_000120, NM_000120.4
0	4.24	NM_031308, NM_031308.4
0	19.56	NM_004446, NM_004446.3
0	5.8	NM_001258376, NM_001258376.2
0	6.7	NM_022772, NM_022772.4
0	6.29	NM_033505, NM_033505.4
0	8.68	NM_005702, NM_005702.4
0	3.64	NM_001983, NM_001983.4
0	8.65	NM_000400, NM_000400.4
0	1.89	NM_006494, NM_006494.4
0	24	NM_001031711, NM_001031711.3
0	24	NM_198398, NM_198398.2
0	24	NM_004450, NM_004450.3
0	4.01	NM_153332, NM_153332.4
0	4.55	NM_001142725, NM_001142725.2
0	22.14	NM_024066, NM_024066.3
0	3.98	NM_207332, NM_207332.3
0	9.37	NM_015701, NM_015701.5
0	9.32	NM_007175, NM_007175.8
0	24	NM_024896, NM_024896.3
0	15.04	NM_014584, NM_014584.3
0	24	NM_006817, NM_006817.4
0	4.44	NM_001017420, NM_001017420.3
0	24	NM_001984, NM_001984.2
0	4.12	NM_012291, NM_012291.5
0	3.61	NM_024939, NM_024939.3
0	24	NM_001184796, NM_001184796.2
0	21.68	NM_020728, NM_020728.3
0	24	NM_000126, NM_000126.4
0	15.46	NM_001985, NM_001985.3
0	24	NM_014297, NM_014297.5
0	5.07	NM_018638, NM_018638.5
0	5.67	NM_005665, NM_005665.6
0	24	NM_016337, NM_016337.3
0	4.25	NM_001988, NM_001988.4
0	13.67	NM_013986, NM_013986.4
0	5.05	NM_001024924, NM_001024924.2
0	7.72	NM_018303, NM_018303.6
0	24	NM_021807, NM_021807.4
0	7.78	NM_015189, NM_015189.3
0	7.3	NM_001145297, NM_001145297.4
0	0.88	NM_175876, NM_175876.5
0	2.96	NM_005107, NM_005107.4
0	24	NM_016046, NM_016046.5
0	7.3	NM_001001998, NM_001001998.3
0	4.75	NM_014285, NM_014285.7
0	4.07	NM_016042, NM_016042.4
0	2.81	NM_019037, NM_019037.3
0	19.38	NM_020158, NM_020158.4
0	4.52	NM_058219, NM_058219.3
0	12.51	NM_181503, NM_181503.3
0	7.06	NM_001034194, NM_001034194.2
0	5.65	NM_004456, NM_004456.5
0	6.15	NM_003379, NM_003379.5
0	2.67	NM_005242, NM_005242.6
0	24	NM_001444, NM_001444.3
0	0.85	NM_003824, NM_003824.4
0	24	NM_013402, NM_013402.7
0	22.66	NM_004265, NM_004265.4
0	24	NM_021727, NM_021727.5
0	4.17	NM_014613, NM_014613.3
0	24	NM_000137, NM_000137.4
0	10.43	NM_016044, NM_016044.3
0	1.82	NM_031452, NM_031452.4
0	4.46	NM_019018, NM_019018.3
0	3.86	NM_138348, NM_138348.6
0	0.2	NM_001025780, NM_001025780.3
0	1.67	NM_021214, NM_021214.2
0	5.39	NM_014719, NM_014719.3
0	3.46	NM_024556, NM_024556.4
0	3.6	NM_032448, NM_032448.3
0	3.75	NM_017848, NM_017848.6
0	24	NM_001078171, NM_001078171.2
0	12.41	NM_001078172, NM_001078172.2
0	7.02	NM_052966, NM_052966.4
0	2.46	NM_144635, NM_144635.5
0	4.4	NM_024293, NM_024293.6
0	4.13	NM_022749, NM_022749.7
0	24	NM_014367, NM_014367.4
0	5.46	NM_001001710, NM_001001710.3
0	3.12	NM_015159, NM_015159.3
0	5.19	NM_001009993, NM_001009993.4
0	24	NM_023933, NM_023933.3
0	5.64	NM_199133, NM_199133.4
0	1.51	NM_032182, NM_032182.4
0	5.47	NM_173607, NM_173607.5
0	5.72	NM_024946, NM_024946.4
0	1.57	NM_001190946, NM_001190946.3
0	9.09	NM_138418, NM_138418.4
0	15.77	NM_207368, NM_207368.5
0	5.69	NM_207318, NM_207318.4
0	8.98	NM_017832, NM_017832.4
0	4.95	NM_058190, NM_058190.4
0	5.99	NM_001112736, NM_001112736.2
0	10.23	NM_013300, NM_013300.3
0	3.4	NM_001184940, NM_001184940.2
0	4.11	NM_020447, NM_020447.5
0	10.81	NM_015262, NM_015262.3
0	4.92	NM_014077, NM_014077.4
0	12.32	NM_021806, NM_021806.4
0	0.6	NM_017633, NM_017633.3
0	6.2	NM_001256763, NM_001256763.2
0	10.13	NM_004699, NM_004699.4
0	3.18	NM_024792, NM_024792.3
0	7.51	NM_152274, NM_152274.5
0	5.52	NM_019013, NM_019013.3
0	4.42	NM_001270384, NM_001270384.2
0	3.11	NM_032809, NM_032809.4
0	1.39	NM_030919, NM_030919.3
0	4.33	NM_198488, NM_198488.5
0	10.72	NM_201400, NM_201400.4
0	6.53	NM_001098784, NM_001098784.2
0	9.97	NM_145269, NM_145269.5
0	24	NM_016062, NM_016062.4
0	9.83	NM_173611, NM_173611.4
0	19.51	NM_174905, NM_174905.4
0	5.55	NM_000135, NM_000135.4
0	6.73	NM_001018115, NM_001018115.3
0	4.53	NM_021922, NM_021922.3
0	7.41	NM_004629, NM_004629.2
0	7.21	NM_018062, NM_018062.4
0	6.89	NM_032228, NM_032228.6
0	7.84	NM_004461, NM_004461.3
0	24	NM_005687, NM_005687.5
0	7.89	NM_004104, NM_004104.5
0	24	NM_001997, NM_001997.5
0	24	NM_001436, NM_001436.4
0	1.74	NM_017556, NM_017556.4
0	24	NM_006486, NM_006486.3
0	24	NM_000138, NM_000138.5
0	1.26	NM_017703, NM_017703.3
0	2.73	NM_024963, NM_024963.6
0	4.7	NM_012162, NM_012162.4
0	6.27	NM_024907, NM_024907.7
0	4.98	NM_033624, NM_033624.3
0	1.6	NM_015176, NM_015176.4
0	5.82	NM_033406, NM_033406.4
0	1.34	NM_032145, NM_032145.5
0	1.93	NM_024735, NM_024735.5
0	4.73	NM_030793, NM_030793.5
0	17.44	NM_033484, NM_033484.3
0	9.13	NM_012179, NM_012179.4
0	4.9	NM_012300, NM_012300.3
0	14.59	NM_022039, NM_022039.4
0	5.27	NM_153348, NM_153348.3
0	19.91	NM_032301, NM_032301.3
0	9.9	NM_015962, NM_015962.5
0	4.33	NM_033449, NM_033449.3
0	7.95	NM_004462, NM_004462.5
0	7.4	NM_001031734, NM_001031734.4
0	17.08	NM_001258012, NM_001258012.4
0	16.66	NM_001012515, NM_001012515.4
0	3.04	NM_004111, NM_004111.6
0	8.37	NM_017671, NM_017671.5
0	6.35	NM_001134999, NM_001134999.2
0	10.23	NM_001042548, NM_001042548.2
0	10.51	NM_007045, NM_007045.4
0	24	NM_213647, NM_213647.3
0	24	NM_000143, NM_000143.4
0	24	NM_001159702, NM_001159702.3
0	3.55	NM_001450, NM_001450.4
0	5.33	NM_004468, NM_004468.5
0	5.95	NM_013241, NM_013241.3
0	24	NM_198897, NM_198897.2
0	5.73	NM_001080472, NM_001080472.4
0	24	NM_021939, NM_021939.4
0	7.18	NM_001143782, NM_001143782.2
0	4.85	NM_015258, NM_015258.2
0	24	NM_000801, NM_000801.5
0	5.36	NM_001135208, NM_001135208.2
0	24	NM_002013, NM_002013.4
0	15.54	NM_002014, NM_002014.4
0	6.23	NM_001145777, NM_001145777.2
0	24	NM_012181, NM_012181.5
0	24	NM_007270, NM_007270.5
0	24	NM_001110556, NM_001110556.2
0	17.95	NM_001164317, NM_001164317.2
0	20.96	NM_005803, NM_005803.4
0	22.99	NM_004475, NM_004475.3
0	5.59	NM_014053, NM_014053.4
0	5.69	NM_175736, NM_175736.5
0	20.39	NM_002024, NM_002024.6
0	5.74	NM_024619, NM_024619.4
0	6.49	NM_015033, NM_015033.3
0	4.44	NM_001024948, NM_001024948.3
0	3.94	NM_015308, NM_015308.5
0	7.45	NM_002027, NM_002027.3
0	8.3	NM_144600, NM_144600.4
0	24	NM_005438, NM_005438.5
0	1.45	NM_005253, NM_005253.4
0	0.82	NM_001451, NM_001451.3
0	4.18	NM_001037165, NM_001037165.2
0	2.39	NM_004514, NM_004514.4
0	12.92	NM_017547, NM_017547.4
0	11.76	NM_024955, NM_024955.6
0	2.96	NM_145246, NM_145246.5
0	1.08	NM_012083, NM_012083.3
0	8.67	NM_004477, NM_004477.3
0	3.68	NM_031904, NM_031904.5
0	14.27	NM_003088, NM_003088.4
0	24	NM_007085, NM_007085.5
0	6.17	NM_005860, NM_005860.3
0	10.46	NM_015082, NM_015082.2
0	24	NM_002032, NM_002032.3
0	24	NM_000146, NM_000146.4
0	11.28	NM_001080432, NM_001080432.3
0	1.99	NM_013393, NM_013393.3
0	6.41	NM_015050, NM_015050.3
0	8.46	NM_003902, NM_003902.5
0	9.65	NM_003934, NM_003934.2
0	17.31	NM_000147, NM_000147.5
0	24	NM_032020, NM_032020.5
0	3.26	NM_145059, NM_145059.3
0	6.35	NM_173794, NM_173794.4
0	13.25	NM_198472, NM_198472.3
0	11.79	NM_001170634, NM_001170634.1
0	2.11	NM_173540, NM_173540.3
0	8.94	NM_181425, NM_181425.3
0	4.79	NM_004860, NM_004860.4
0	24	NM_001164605, NM_001164605.2
0	3.09	NM_016263, NM_016263.4
0	4.97	NM_005754, NM_005754.3
0	4.93	NM_203505, NM_203505.3
0	24	NM_138387, NM_138387.4
0	24	NM_001042351, NM_001042351.3
0	24	NM_007278, NM_007278.2
0	3.75	NM_031412, NM_031412.4
0	17.74	NM_007285, NM_007285.7
0	0.92	NM_004961, NM_004961.4
0	1.71	NM_001924, NM_001924.4
0	1.23	NM_015675, NM_015675.4
0	7.92	NM_052850, NM_052850.4
0	24	NM_000154, NM_000154.2
0	8.17	NM_001001556, NM_001001556.3
0	8.7	NM_138801, NM_138801.3
0	24	NM_000512, NM_000512.5
0	8.51	NM_198321, NM_198321.4
0	13.11	NM_004481, NM_004481.5
0	11.75	NM_017423, NM_017423.3
0	24	NM_000155, NM_000155.4
0	24	NM_138924, NM_138924.3
0	4.25	NM_022041, NM_022041.4
0	24	NM_198335, NM_198335.4
0	5.88	NM_018983, NM_018983.4
0	11.11	NM_002047, NM_002047.4
0	10.33	NM_000819, NM_000819.5
0	4.11	NM_001481, NM_001481.3
0	3.41	NM_021167, NM_021167.5
0	7.21	NM_017660, NM_017660.5
0	3.09	NM_020699, NM_020699.4
0	4.96	NM_176818, NM_176818.3
0	24	NM_001483, NM_001483.3
0	24	NM_000158, NM_000158.4
0	18.18	NM_001171690, NM_001171690.2
0	13.78	NM_000159, NM_000159.4
0	24	NM_005258, NM_005258.3
0	5.04	NM_002061, NM_002061.4
0	8.71	NM_006836, NM_006836.2
0	24	NM_004483, NM_004483.5
0	9.79	NM_018972, NM_018972.4
0	16.44	NM_016641, NM_016641.4
0	6.08	NM_005811, NM_005811.5
0	3.84	NM_004864, NM_004864.4
0	12.95	NM_001493, NM_001493.3
0	13.57	NM_001494, NM_001494.4
0	5.35	NM_003616, NM_003616.3
0	1.51	NM_015721, NM_015721.3
0	5.8	NM_015465, NM_015465.5
0	4.61	NM_015949, NM_015949.3
0	0.4	NM_005262, NM_005262.3
0	11.93	NM_024996, NM_024996.7
0	7.43	NM_001244710, NM_001244710.2
0	4.61	NM_005110, NM_005110.4
0	4.27	NM_015044, NM_015044.4
0	9.45	NM_001199815, NM_001199815.2
0	6.14	NM_000821, NM_000821.7
0	24	NM_003878, NM_003878.3
0	0.27	NM_024835, NM_024835.5
0	24	NM_014394, NM_014394.3
0	3.95	NM_017896, NM_017896.3
0	11.17	NM_138785, NM_138785.5
0	4.55	NM_021067, NM_021067.5
0	7.69	NM_016095, NM_016095.3
0	1.6	NM_001126129, NM_001126129.2
0	12.81	NM_032336, NM_032336.3
0	6.51	NM_001085454, NM_001085454.2
0	5.05	NM_057169, NM_057169.5
0	4.46	NM_000165, NM_000165.5
0	5.03	NM_001039547, NM_001039547.3
0	24	NM_000404, NM_000404.4
0	24	NM_138342, NM_138342.4
0	7.54	NM_001003722, NM_001003722.2
0	18.58	NM_001145667, NM_001145667.2
0	2.35	NM_138465, NM_138465.4
0	6.66	NM_022343, NM_022343.4
0	7.32	NM_053274, NM_053274.3
0	24	NM_006708, NM_006708.3
0	9.79	NM_016080, NM_016080.4
0	15.77	NM_002064, NM_002064.3
0	24	NM_001199868, NM_001199868.2
0	9.33	NM_016417, NM_016417.3
0	6.78	NM_014905, NM_014905.5
0	24	NM_024656, NM_024656.4
0	12.12	NM_016433, NM_016433.4
0	6.43	NM_015710, NM_015710.5
0	24	NM_005271, NM_005271.5
0	6.69	NM_032569, NM_032569.4
0	24	NM_000405, NM_000405.5
0	24	NM_001500, NM_001500.4
0	1.88	NM_012384, NM_012384.5
0	12.6	NM_004124, NM_004124.3
0	5.18	NM_016573, NM_016573.4
0	3.53	NM_015895, NM_015895.5
0	4.7	NM_021971, NM_021971.4
0	10.05	NM_003875, NM_003875.3
0	4.78	NM_002067, NM_002067.5
0	1.86	NM_006572, NM_006572.6
0	3.63	NM_002069, NM_002069.6
0	16.48	NM_002070, NM_002070.4
0	8.73	NM_006496, NM_006496.4
0	4.05	NM_053004, NM_053004.3
0	24	NM_005273, NM_005273.4
0	24	NM_006098, NM_006098.5
0	8.18	NM_021629, NM_021629.4
0	8.61	NM_016194, NM_016194.4
0	3.22	NM_005476, NM_005476.7
0	24	NM_001017998, NM_001017998.4
0	14.19	NM_004126, NM_004126.4
0	15.89	NM_018841, NM_018841.6
0	10.25	NM_005275, NM_005275.5
0	5.36	NM_013285, NM_013285.3
0	7.32	NM_005471, NM_005471.5
0	5.66	NM_138335, NM_138335.3
0	5.98	NM_198066, NM_198066.4
0	4.54	NM_032520, NM_032520.5
0	24	NM_002076, NM_002076.4
0	5.57	NM_004486, NM_004486.6
0	3.35	NM_005113, NM_005113.4
0	12.25	NM_016548, NM_016548.4
0	1.9	NM_018178, NM_018178.6
0	7.14	NM_016072, NM_016072.5
0	2.04	NM_020399, NM_020399.4
0	0.93	NM_152281, NM_152281.3
0	4.69	NM_031899, NM_031899.4
0	5.23	NM_015530, NM_015530.5
0	3.78	NM_004287, NM_004287.5
0	8.03	NM_002079, NM_002079.3
0	24	NM_002080, NM_002080.4
0	24	NM_003801, NM_003801.4
0	2.95	NM_018025, NM_018025.3
0	3.04	NM_001002909, NM_001002909.4
0	9.87	NM_002081, NM_002081.3
0	11.06	NM_015141, NM_015141.4
0	13.64	NM_001083112, NM_001083112.3
0	9.44	NM_020806, NM_020806.5
0	24	NM_000175, NM_000175.5
0	6.34	NM_015698, NM_015698.6
0	2.82	NM_018066, NM_018066.4
0	13.19	NM_001164372, NM_001164372.2
0	24	NM_001080452, NM_001080452.2
0	1.1	NM_024980, NM_024980.5
0	4.88	NM_003979, NM_003979.4
0	17.16	NM_004489, NM_004489.5
0	4.39	NM_001145638, NM_001145638.3
0	24	NM_201397, NM_201397.3
0	24	NM_001039848, NM_001039848.4
0	6.57	NM_001008397, NM_001008397.4
0	4.2	NM_020895, NM_020895.5
0	5.12	NM_002086, NM_002086.5
0	17.33	NM_012203, NM_012203.2
0	24	NM_000837, NM_000837.2
0	6.98	NM_020137, NM_020137.5
0	8.47	NM_001004106, NM_001004106.3
0	24	NM_002087, NM_002087.4
0	4.47	NM_025196, NM_025196.4
0	0.38	NM_152407, NM_152407.4
0	7.49	NM_002092, NM_002092.4
0	5.85	NM_024719, NM_024719.4
0	3.04	NM_031485, NM_031485.4
0	0.9	NM_031965, NM_031965.2
0	6.08	NM_019884, NM_019884.3
0	2.43	NM_016472, NM_016472.5
0	14.03	NM_000637, NM_000637.5
0	24	NM_000178, NM_000178.4
0	24	NM_001143679, NM_001143679.2
0	19.11	NM_000850, NM_000850.5
0	24	NM_000852, NM_000852.4
0	17.33	NM_145870, NM_145870.3
0	4.35	NM_015859, NM_015859.4
0	2.09	NM_001514, NM_001514.6
0	1.67	NM_005513, NM_005513.3
0	8.33	NM_002095, NM_002095.6
0	5.69	NM_002096, NM_002096.3
0	5.47	NM_004128, NM_004128.3
0	6.09	NM_001516, NM_001516.5
0	5.02	NM_001199207, NM_001199207.2
0	24	NM_002097, NM_002097.3
0	8.64	NM_001520, NM_001520.4
0	5.85	NM_001521, NM_001521.4
0	6.73	NM_012086, NM_012086.5
0	2.02	NM_012204, NM_012204.4
0	5.88	NM_001122823, NM_001122823.2
0	6.99	NM_004286, NM_004286.5
0	3.46	NM_033107, NM_033107.4
0	4.07	NM_019096, NM_019096.5
0	3.95	NM_133644, NM_133644.4
0	5.38	NM_012341, NM_012341.3
0	3.34	NM_015666, NM_015666.4
0	4.67	NM_014170, NM_014170.4
0	4.41	NM_016426, NM_016426.7
0	24	NM_000181, NM_000181.4
0	11.56	NM_004130, NM_004130.4
0	9.89	NM_002103, NM_002103.5
0	5.06	NM_006026, NM_006026.4
0	15.34	NM_138635, NM_138635.3
0	2.75	NM_002105, NM_002105.3
0	24	NM_138610, NM_138610.3
0	12.96	NM_002106, NM_002106.4
0	7.4	NM_005324, NM_005324.5
0	19.84	NM_001184705, NM_001184705.4
0	24	NM_000182, NM_000182.5
0	24	NM_000183, NM_000183.3
0	13.25	NM_005326, NM_005326.6
0	7.37	NM_032304, NM_032304.4
0	11.79	NM_002109, NM_002109.6
0	5.24	NM_012208, NM_012208.4
0	21.48	NM_003642, NM_003642.4
0	10.92	NM_138443, NM_138443.4
0	6.9	NM_018097, NM_018097.3
0	17.37	NM_001166269, NM_001166269.2
0	7.06	NM_015302, NM_015302.2
0	3.07	NM_033417, NM_033417.2
0	4.39	NM_005333, NM_005333.5
0	8.63	NM_017885, NM_017885.4
0	24	NM_001194, NM_001194.4
0	17.81	NM_004964, NM_004964.3
0	3.65	NM_032019, NM_032019.6
0	12.39	NM_001527, NM_001527.4
0	16.53	NM_003883, NM_003883.4
0	9.11	NM_006044, NM_006044.4
0	10.98	NM_001166419, NM_001166419.2
0	18.37	NM_016063, NM_016063.3
0	18.56	NM_004494, NM_004494.3
0	7.92	NM_001001520, NM_001001520.3
0	1.94	NM_001135565, NM_001135565.2
0	10.92	NM_017802, NM_017802.4
0	9.9	NM_015473, NM_015473.4
0	2.9	NM_022070, NM_022070.5
0	24	NM_015987, NM_015987.5
0	10.16	NM_024602, NM_024602.6
0	5.43	NM_018063, NM_018063.5
0	5.62	NM_004667, NM_004667.6
0	11.62	NM_016323, NM_016323.4
0	1.59	NM_014685, NM_014685.4
0	4.9	NM_001165967, NM_001165967.2
0	24	NM_000520, NM_000520.6
0	24	NM_000521, NM_000521.4
0	1.14	NM_001040708, NM_001040708.2
0	17.65	NM_000410, NM_000410.4
0	9.18	NM_004712, NM_004712.5
0	7.7	NM_152419, NM_152419.3
0	19.43	NM_152740, NM_152740.4
0	12.09	NM_014362, NM_014362.4
0	5.12	NM_001530, NM_001530.4
0	3.57	NM_017902, NM_017902.3
0	0.89	NM_013332, NM_013332.4
0	24	NM_005340, NM_005340.7
0	24	NM_032593, NM_032593.3
0	4.53	NM_138571, NM_138571.5
0	6.34	NM_005338, NM_005338.7
0	6.24	NM_003959, NM_003959.3
0	6.05	NM_003609, NM_003609.5
0	1.74	NM_005319, NM_005319.4
0	1.73	NM_003512, NM_003512.4
0	1.58	NM_021064, NM_021064.5
0	1.59	NM_003514, NM_003514.2
0	1.75	NM_021063, NM_021063.4
0	1.69	NM_003518, NM_003518.4
0	1.76	NM_021058, NM_021058.4
0	1.47	NM_003527, NM_003527.4
0	1.75	NM_003536, NM_003536.3
0	3.08	NM_003542, NM_003542.4
0	2.34	NM_003543, NM_003543.4
0	0.39	NM_003528, NM_003528.3
0	1.3	NM_033445, NM_033445.3
0	1.22	NM_018410, NM_018410.5
0	24	NM_001242758, NM_001242758.1
0	24	NM_005514, NM_005514.8
0	24	NM_002117, NM_002117.6
0	13.48	NM_005516, NM_005516.6
0	14.6	NM_003071, NM_003071.4
0	0.36	NM_021958, NM_021958.4
0	24	NM_178582, NM_178582.3
0	13.78	NM_000190, NM_000190.4
0	17.73	NM_006339, NM_006339.3
0	19.42	NM_145901, NM_145901.3
0	4.5	NM_001130688, NM_001130688.1
0	6.76	NM_005342, NM_005342.4
0	19.42	NM_000191, NM_000191.3
0	4.05	NM_000859, NM_000859.3
0	7.31	NM_001098272, NM_001098272.3
0	24	NM_004965, NM_004965.7
0	24	NM_005517, NM_005517.4
0	24	NM_001201362, NM_001201362.2
0	4.43	NM_006353, NM_006353.3
0	4.44	NM_001142556, NM_001142556.2
0	4.09	NM_002133, NM_002133.3
0	4.99	NM_144570, NM_144570.3
0	6.37	NM_006895, NM_006895.3
0	3.59	NM_006805, NM_006805.4
0	14.88	NM_031157, NM_031157.4
0	11.44	NM_031243, NM_031243.3
0	12.43	NM_194247, NM_194247.3
0	6.28	NM_031266, NM_031266.3
0	24	NM_031314, NM_031314.3
0	22.25	NM_031370, NM_031370.3
0	15.95	NM_001257293, NM_001257293.2
0	6.34	NM_019597, NM_019597.5
0	13.53	NM_012207, NM_012207.3
0	24	NM_002140, NM_002140.5
0	24	NM_001533, NM_001533.3
0	12.75	NM_005968, NM_005968.5
0	8.41	NM_001102398, NM_001102398.3
0	9.02	NM_031844, NM_031844.3
0	8.92	NM_007040, NM_007040.6
0	9.25	NM_001079559, NM_001079559.3
0	5.55	NM_013312, NM_013312.3
0	6.1	NM_032410, NM_032410.4
0	2.55	NM_018951, NM_018951.4
0	2.74	NM_004502, NM_004502.4
0	1.07	NM_014212, NM_014212.4
0	6.38	NM_016287, NM_016287.5
0	2.83	NM_032756, NM_032756.4
0	24	NM_000194, NM_000194.3
0	12.66	NM_032383, NM_032383.5
0	0.83	NM_024747, NM_024747.6
0	24	NM_005836, NM_005836.3
0	4.76	NM_022460, NM_022460.4
0	24	NM_001537, NM_001537.4
0	24	NM_001136180, NM_001136180.2
0	6.22	NM_172002, NM_172002.5
0	24	NM_004493, NM_004493.3
0	14.22	NM_016245, NM_016245.5
0	24	NM_016142, NM_016142.3
0	3.64	NM_031463, NM_031463.5
0	20.84	NM_032303, NM_032303.5
0	16.7	NM_001271970, NM_001271970.2
0	24	NM_003299, NM_003299.3
0	7.44	NM_006948, NM_006948.5
0	4.01	NM_005345, NM_005345.6
0	3.62	NM_005346, NM_005346.6
0	10.91	NM_002154, NM_002154.4
0	7.04	NM_014278, NM_014278.4
0	11.46	NM_005347, NM_005347.5
0	7.83	NM_006597, NM_006597.6
0	17.18	NM_004134, NM_004134.7
0	24	NM_001540, NM_001540.5
0	24	NM_016126, NM_016126.4
0	3.02	NM_014365, NM_014365.3
0	2.03	NM_024610, NM_024610.6
0	24	NM_199440, NM_199440.2
0	24	NM_002157, NM_002157.3
0	2.88	NM_005529, NM_005529.7
0	7.32	NM_006644, NM_006644.4
0	24	NM_002775, NM_002775.5
0	7.43	NM_145074, NM_145074.2
0	8.32	NM_004507, NM_004507.4
0	24	NM_001243526, NM_001243526.2
0	24	NM_001039613, NM_001039613.3
0	24	NM_018060, NM_018060.4
0	3.34	NM_001010867, NM_001010867.4
0	13.83	NM_002162, NM_002162.5
0	3.31	NM_003259, NM_003259.4
0	5.57	NM_012405, NM_012405.4
0	6.47	NM_001545, NM_001545.3
0	3.28	NM_181353, NM_181353.3
0	0.28	NM_002167, NM_002167.5
0	11.86	NM_005896, NM_005896.4
0	24	NM_002168, NM_002168.4
0	12.92	NM_005530, NM_005530.3
0	24	NM_006899, NM_006899.5
0	24	NM_174869, NM_174869.3
0	4.59	NM_004508, NM_004508.4
0	0.7	NM_003897, NM_003897.4
0	11.18	NM_016097, NM_016097.5
0	0.73	NM_016545, NM_016545.5
0	2.42	NM_001136265, NM_001136265.2
0	24	NM_145249, NM_145249.3
0	24	NM_032036, NM_032036.3
0	24	NM_006332, NM_006332.5
0	15.49	NM_005533, NM_005533.5
0	5.75	NM_006820, NM_006820.4
0	24	NM_003641, NM_003641.5
0	24	NM_021034, NM_021034.3
0	6.04	NM_000416, NM_000416.3
0	24	NM_052985, NM_052985.4
0	7.49	NM_014714, NM_014714.4
0	9.07	NM_001255995, NM_001255995.3
0	12.1	NM_018010, NM_018010.4
0	2.31	NM_006546, NM_006546.4
0	5.13	NM_006548, NM_006548.6
0	13.52	NM_000876, NM_000876.4
0	24	NM_000597, NM_000597.3
0	24	NM_002178, NM_002178.3
0	24	NM_001553, NM_001553.3
0	2.54	NM_002180, NM_002180.3
0	10.71	NM_006083, NM_006083.4
0	5.68	NM_153687, NM_153687.4
0	5.88	NM_000628, NM_000628.5
0	24	NM_001560, NM_001560.3
0	3.13	NM_014339, NM_014339.7
0	6.93	NM_018725, NM_018725.4
0	13.27	NM_153461, NM_153461.4
0	6.35	NM_001562, NM_001562.4
0	7.98	NM_004843, NM_004843.4
0	24	NM_001012631, NM_001012631.4
0	3.59	NM_002185, NM_002185.5
0	11.28	NM_017620, NM_017620.3
0	16.11	NM_001014795, NM_001014795.3
0	9.19	NM_030768, NM_030768.3
0	14.58	NM_006839, NM_006839.3
0	4.95	NM_033416, NM_033416.3
0	7.54	NM_001144878, NM_001144878.2
0	12.94	NM_014214, NM_014214.3
0	11.89	NM_000883, NM_000883.4
0	24	NM_000884, NM_000884.3
0	6.32	NM_176877, NM_176877.5
0	4.4	NM_001040694, NM_001040694.2
0	8.08	NM_022489, NM_022489.4
0	3.34	NM_019071, NM_019071.3
0	5.7	NM_001127582, NM_001127582.2
0	0.73	NM_032329, NM_032329.6
0	2.34	NM_021218, NM_021218.3
0	4.67	NM_031288, NM_031288.4
0	5.58	NM_001098817, NM_001098817.2
0	11.95	NM_173618, NM_173618.3
0	4.85	NM_005540, NM_005540.3
0	2.62	NM_005542, NM_005542.6
0	23.43	NM_002195, NM_002195.2
0	10.04	NM_033547, NM_033547.4
0	0.36	NM_001039938, NM_001039938.2
0	11.94	NM_017864, NM_017864.4
0	24	NM_024658, NM_024658.4
0	13.08	NM_018085, NM_018085.5
0	3.12	NM_022755, NM_022755.6
0	1.76	NM_001160042, NM_001160042.2
0	3.34	NM_001197113, NM_001197113.2
0	24	NM_003870, NM_003870.4
0	4.97	NM_178229, NM_178229.5
0	24	NM_001569, NM_001569.4
0	2.75	NM_001570, NM_001570.4
0	6.43	NM_001114182, NM_001114182.3
0	1.99	NM_015649, NM_015649.3
0	2.27	NM_006084, NM_006084.5
0	3.45	NM_001007561, NM_001007561.3
0	0.87	NM_003749, NM_003749.3
0	3.98	NM_194279, NM_194279.4
0	19.23	NM_213595, NM_213595.4
0	24	NM_005101, NM_005101.4
0	8.96	NM_016048, NM_016048.2
0	11.07	NM_024710, NM_024710.3
0	6.95	NM_001199469, NM_001199469.2
0	4.41	NM_001204890, NM_001204890.2
0	24	NM_030790, NM_030790.5
0	6.09	NM_018463, NM_018463.4
0	24	NM_002204, NM_002204.4
0	6.9	NM_002205, NM_002205.5
0	16.18	NM_000210, NM_000210.4
0	24	NM_002210, NM_002210.5
0	24	NM_133376, NM_133376.3
0	24	NM_021999, NM_021999.5
0	24	NM_030926, NM_030926.6
0	19.37	NM_033453, NM_033453.4
0	12.98	NM_014216, NM_014216.6
0	1.19	NM_025194, NM_025194.3
0	8.02	NM_002224, NM_002224.4
0	4.78	NM_002226, NM_002226.5
0	2.73	NM_032492, NM_032492.4
0	13.16	NM_002227, NM_002227.4
0	2.88	NM_023007, NM_023007.3
0	2.67	NM_001081461, NM_001081461.2
0	8.08	NM_001114632, NM_001114632.2
0	14.24	NM_001005920, NM_001005920.4
0	2.27	NM_020647, NM_020647.4
0	2.39	NM_002228, NM_002228.4
0	1.05	NM_002229, NM_002229.3
0	2.83	NM_005354, NM_005354.6
0	24	NM_002230, NM_002230.4
0	4.7	NM_015493, NM_015493.7
[truncated: 6,343 more rows]

## Sheet: Maekawa et al. (2015)
Supplemental Table 3. List of cumulative uORF length and mRNA half-life re-analyzed from Tani et al. (2012) and Maekawa et al. (2015).
uORF length (codons)	BRIQ-seq mRNA half-life (hr)	Transcript Id
0	23.44	NM_015665, NM_015665.6
0	5.28	NM_023928, NM_023928.5
0	14.11	NM_153698, NM_153698.2
0	24	NM_024684, NM_024684.4
0	8.68	NM_001087, NM_001087.5
0	6.93	NM_001605, NM_001605.3
0	4.45	NM_020745, NM_020745.4
0	24	NM_001261434, NM_001261434.2
0	7.79	NM_015423, NM_015423.3
0	8.08	NM_012138, NM_012138.4
0	5.3	NM_212533, NM_212533.3
0	8.18	NM_012089, NM_012089.3
0	22.51	NM_004299, NM_004299.6
0	4.08	NM_004996, NM_004996.4
0	9.4	NM_005845, NM_005845.5
0	5.75	NM_000033, NM_000033.4
0	13.14	NM_002858, NM_002858.4
0	3.08	NM_005050, NM_005050.4
0	12.72	NM_002940, NM_002940.3
0	6.05	NM_001025091, NM_001025091.2
0	7.91	NM_007189, NM_007189.3
0	2.96	NM_018358, NM_018358.3
0	4.11	NM_001272069, NM_001272069.2
0	9.54	NM_001177515, NM_001177515.2
0	0.53	NM_080622, NM_080622.4
0	11.1	NM_138340, NM_138340.5
0	4.69	NM_022060, NM_022060.3
0	2.15	NM_020676, NM_020676.7
0	24	NM_021243, NM_021243.3
0	1.77	NM_013375, NM_013375.4
0	24	NM_006111, NM_006111.3
0	4.03	NM_014384, NM_014384.3
0	10.47	NM_014049, NM_014049.5
0	8.01	NM_000017, NM_000017.4
0	4.51	NM_030649, NM_030649.3
0	24	NM_000019, NM_000019.4
0	24	NM_005891, NM_005891.3
0	3.73	NM_022735, NM_022735.4
0	12.1	NM_032360, NM_032360.4
0	7.65	NM_001082486, NM_001082486.2
0	15.76	NM_001096, NM_001096.3
0	22.95	NM_002197, NM_002197.3
0	5.3	NM_006821, NM_006821.6
0	24	NM_007274, NM_007274.4
0	17.06	NM_001037171, NM_001037171.2
0	24	NM_004300, NM_004300.4
0	9.93	NM_001610, NM_001610.4
0	9.11	NM_001995, NM_001995.5
0	12.06	NM_004457, NM_004457.5
0	11.11	NM_022977, NM_022977.3
0	24	NM_001101, NM_001101.5
0	18.39	NM_030812, NM_030812.3
0	11.53	NM_001130004, NM_001130004.2
0	19.08	NM_004924, NM_004924.6
0	16.98	NM_018477, NM_018477.3
0	4.54	NM_005736, NM_005736.4
0	7.79	NM_005735, NM_005735.4
0	24	NM_001005386, NM_001005386.3
0	4.91	NM_020445, NM_020445.6
0	3.71	NM_024855, NM_024855.4
0	5.26	NM_022496, NM_022496.5
0	4.36	NM_022899, NM_022899.5
0	1.45	NM_020328, NM_020328.4
0	24	NM_000666, NM_000666.3
0	24	NM_001107, NM_001107.5
0	24	NM_207197, NM_207197.3
0	1	NM_006988, NM_006988.5
0	2.02	NM_018702, NM_018702.4
0	9.57	NM_020421, NM_020421.4
0	3.6	NM_020247, NM_020247.5
0	2.87	NM_015270, NM_015270.5
0	8.55	NM_176801, NM_176801.3
0	22.43	NM_016824, NM_016824.5
0	24	NM_018269, NM_018269.4
0	4.63	NM_024551, NM_024551.3
0	24	NM_001123, NM_001123.4
0	0.53	NM_001101340, NM_001101340.2
0	1.91	NM_014913, NM_014913.4
0	4.29	NM_031284, NM_031284.5
0	1.71	NM_017825, NM_017825.3
0	5.17	NM_007002, NM_007002.4
0	24	NM_000026, NM_000026.4
0	9.88	NM_152328, NM_152328.5
0	3.57	NM_153207, NM_153207.5
0	1.11	NM_022767, NM_022767.4
0	24	NM_001130, NM_001130.6
0	2.69	NM_001134647, NM_001134647.2
0	8.43	NM_152406, NM_152406.4
0	6.79	NM_006796, NM_006796.3
0	6.4	NM_001145526, NM_001145526.3
0	7.25	NM_001135187, NM_001135187.2
0	6.67	NM_018238, NM_018238.4
0	10.64	NM_024758, NM_024758.5
0	3.94	NM_012154, NM_012154.5
0	7.73	NM_006412, NM_006412.4
0	4.37	NM_020132, NM_020132.5
0	5.07	NM_018361, NM_018361.5
0	4.32	NM_032717, NM_032717.5
0	19.53	NM_003659, NM_003659.4
0	3.16	NM_198576, NM_198576.4
0	17.5	NM_001040197, NM_001040197.2
0	3.11	NM_015446, NM_015446.5
0	12.47	NM_015328, NM_015328.4
0	2.84	NM_001621, NM_001621.5
0	9.04	NM_012111, NM_012111.3
0	11.77	NM_001185095, NM_001185095.2
0	2.99	NM_001198696, NM_001198696.2
0	24	NM_016108, NM_016108.4
0	9.09	NM_006303, NM_006303.4
0	24	NM_000476, NM_000476.3
0	24	NM_001625, NM_001625.4
0	13.71	NM_016282, NM_016282.4
0	3.7	NM_006738, NM_006738.6
0	2.78	NM_024595, NM_024595.3
0	2.39	NM_018064, NM_018064.4
0	24	NM_001628, NM_001628.4
0	24	NM_001253908, NM_001253908.2
0	24	NM_003689, NM_003689.4
0	24	NM_153329, NM_153329.4
0	11.38	NM_002860, NM_002860.4
0	13.17	NM_001034173, NM_001034173.4
0	24	NM_000690, NM_000690.4
0	24	NM_005589, NM_005589.4
0	24	NM_001182, NM_001182.5
0	17.58	NM_000696, NM_000696.4
0	24	NM_001243177, NM_001243177.4
0	24	NM_005165, NM_005165.3
0	6.31	NM_019109, NM_019109.5
0	3.09	NM_033087, NM_033087.4
0	24	NM_005787, NM_005787.6
0	24	NM_001007027, NM_001007027.3
0	2.64	NM_006020, NM_006020.3
0	1.15	NM_017621, NM_017621.4
0	24	NM_000478, NM_000478.6
0	0.59	NM_006492, NM_006492.3
0	1.71	NM_021926, NM_021926.4
0	20.61	NM_005782, NM_005782.4
0	3.29	NM_014324, NM_014324.6
0	1.37	NM_015944, NM_015944.4
0	9.44	NM_001144, NM_001144.6
0	1.78	NM_016201, NM_016201.4
0	24	NM_212557, NM_212557.4
0	24	NM_001002244, NM_001002244.2
0	6.34	NM_015391, NM_015391.4
0	4.38	NM_013366, NM_013366.4
0	6.36	NM_013367, NM_013367.3
0	24	NM_016237, NM_016237.5
0	6.44	NM_016238, NM_016238.3
0	4.85	NM_015305, NM_015305.4
0	6.93	NM_017747, NM_017747.3
0	3.63	NM_020690, NM_020690.6
0	1.61	NM_152363, NM_152363.6
0	3.49	NM_015114, NM_015114.3
0	3.96	NM_020319, NM_020319.3
0	3.64	NM_017664, NM_017664.4
0	6.72	NM_033121, NM_033121.2
0	1.8	NM_019046, NM_019046.3
0	4.31	NM_032217, NM_032217.5
0	10.15	NM_173505, NM_173505.4
0	4.24	NM_032290, NM_032290.4
0	3.43	NM_016466, NM_016466.6
0	4.64	NM_138797, NM_138797.4
0	3.53	NM_015245, NM_015245.3
0	4.79	NM_173551, NM_173551.5
0	6.54	NM_018685, NM_018685.5
0	23.01	NM_001204831, NM_001204831.3
0	7.85	NM_001204803, NM_001204803.2
0	13.88	NM_006305, NM_006305.4
0	18.46	NM_001150, NM_001150.3
0	24	NM_000700, NM_000700.3
0	24	NM_001153, NM_001153.5
0	24	NM_001154, NM_001154.4
0	15.97	NM_004034, NM_004034.4
0	24	NM_001127, NM_001127.4
0	3.72	NM_003917, NM_003917.5
0	5.63	NM_001130524, NM_001130524.2
0	24	NM_005498, NM_005498.5
0	24	NM_001283, NM_001283.5
0	24	NM_014203, NM_014203.3
0	5.49	NM_001242837, NM_001242837.2
0	24	NM_001030006, NM_001030006.2
0	24	NM_004069, NM_004069.6
0	9.59	NM_001261826, NM_001261826.3
0	7.2	NM_207012, NM_207012.4
0	24	NM_001284, NM_001284.4
0	2.59	NM_005829, NM_005829.5
0	3.58	NM_006594, NM_006594.5
0	1.9	NM_004722, NM_004722.4
0	1.43	NM_138368, NM_138368.5
0	2.4	NM_014855, NM_014855.3
0	24	NM_001640, NM_001640.4
0	9.64	NM_001641, NM_001641.4
0	2.81	NM_014481, NM_014481.4
0	8.79	NM_016022, NM_016022.4
0	15.99	NM_001142930, NM_001142930.2
0	24	NM_015957, NM_015957.4
0	8.99	NM_199294, NM_199294.3
0	15.61	NM_020531, NM_020531.3
0	24	NM_144772, NM_144772.3
0	23.96	NM_004900, NM_004900.5
0	24	NM_019101, NM_019101.3
0	24	NM_024122, NM_024122.5
0	7.56	NM_198450, NM_198450.6
0	24	NM_000484, NM_000484.4
0	4.15	NM_006380, NM_006380.5
0	7.12	NM_012096, NM_012096.3
0	5.7	NM_001251904, NM_001251904.2
0	24	NM_000485, NM_000485.3
0	9.22	NM_004925, NM_004925.5
0	10.58	NM_014691, NM_014691.3
0	7.6	NM_001655, NM_001655.5
0	10.73	NM_001659, NM_001659.3
0	18.8	NM_001660, NM_001660.4
0	24	NM_001662, NM_001662.4
0	1.99	NM_175609, NM_175609.3
0	3.04	NM_032389, NM_032389.6
0	6.46	NM_014570, NM_014570.5
0	4.88	NM_001025595, NM_001025595.3
0	6.08	NM_001242854, NM_001242854.3
0	0.66	NM_001267549, NM_001267549.3
0	24	NM_001172, NM_001172.4
0	2.41	NM_018011, NM_018011.4
0	2.85	NM_001199417, NM_001199417.2
0	5.54	NM_004706, NM_004706.4
0	4.85	NM_014629, NM_014629.4
0	3.5	NM_014448, NM_014448.4
0	2.28	NM_001162383, NM_001162383.2
0	5.07	NM_032818, NM_032818.3
0	3.44	NM_018071, NM_018071.5
0	2.41	NM_016374, NM_016374.6
0	4.12	NM_005744, NM_005744.5
0	12.5	NM_001177, NM_001177.6
0	5.66	NM_001040025, NM_001040025.3
0	24	NM_001667, NM_001667.4
0	24	NM_004311, NM_004311.4
0	2.84	NM_178815, NM_178815.5
0	5.28	NM_015161, NM_015161.3
0	24	NM_018694, NM_018694.4
0	17.46	NM_006407, NM_006407.4
0	1.63	NM_138795, NM_138795.4
0	16.14	NM_031905, NM_031905.5
0	1.89	NM_001105247, NM_001105247.2
0	4.5	NM_001199196, NM_001199196.2
0	1.83	NM_024585, NM_024585.4
0	6.18	NM_001668, NM_001668.4
0	20.3	NM_006409, NM_006409.4
0	24	NM_005720, NM_005720.4
0	24	NM_152862, NM_152862.3
0	12.47	NM_001270439, NM_001270439.2
0	7.32	NM_006628, NM_006628.6
0	7.18	NM_001257328, NM_001257328.2
0	6.15	NM_152285, NM_152285.4
0	1.6	NM_001025604, NM_001025604.3
0	24	NM_000046, NM_000046.5
0	24	NM_022786, NM_022786.3
0	4.33	NM_017707, NM_017707.4
0	1.43	NM_001040445, NM_001040445.3
0	2.35	NM_024701, NM_024701.4
0	1.96	NM_017873, NM_017873.4
0	5.24	NM_001198799, NM_001198799.3
0	10.44	NM_032204, NM_032204.5
0	5.09	NM_018154, NM_018154.3
0	19.53	NM_004317, NM_004317.4
0	24	NM_183356, NM_183356.4
0	23.9	NM_004318, NM_004318.4
0	24	NM_181718, NM_181718.4
0	5.1	NM_018136, NM_018136.5
0	6.33	NM_001251888, NM_001251888.2
0	24	NM_001083926, NM_001083926.2
0	24	NM_054012, NM_054012.4
0	2.55	NM_014010, NM_014010.5
0	6.13	NM_014109, NM_014109.4
0	8.63	NM_018188, NM_018188.5
0	5.17	NM_031921, NM_031921.6
0	5.98	NM_001001976, NM_001001976.3
0	4.49	NM_005171, NM_005171.5
0	2.71	NM_001040619, NM_001040619.3
0	16.43	NM_007348, NM_007348.4
0	23.56	NM_004381, NM_004381.5
0	3.45	NM_018179, NM_018179.5
0	5.48	NM_004707, NM_004707.4
0	2.14	NM_014924, NM_014924.5
0	4.49	NM_015104, NM_015104.3
0	4.41	NM_178326, NM_178326.3
0	5.12	NM_006395, NM_006395.3
0	2.45	NM_025092, NM_025092.5
0	22.32	NM_004044, NM_004044.7
0	4.01	NM_022374, NM_022374.5
0	5.74	NM_015459, NM_015459.5
0	4.12	NM_015251, NM_015251.3
0	24	NM_004045, NM_004045.4
0	6.66	NM_020410, NM_020410.3
0	24	NM_001160233, NM_001160233.2
0	7.5	NM_001677, NM_001677.4
0	24	NM_001679, NM_001679.4
0	7.67	NM_170665, NM_170665.4
0	24	NM_001686, NM_001686.4
0	24	NM_001001973, NM_001001973.3
0	24	NM_001687, NM_001687.5
0	24	NM_006886, NM_006886.4
0	24	NM_001688, NM_001688.5
0	24	NM_005175, NM_005175.3
0	24	NM_001002031, NM_001002031.4
0	24	NM_001190329, NM_001190329.2
0	24	NM_006356, NM_006356.3
0	24	NM_007100, NM_007100.4
0	24	NM_001003696, NM_001003696.2
0	24	NM_004889, NM_004889.5
0	24	NM_006476, NM_006476.5
0	24	NM_001697, NM_001697.3
0	6.63	NM_001167867, NM_001167867.2
0	24	NM_001183, NM_001183.6
0	24	NM_005765, NM_005765.3
0	11.54	NM_001130020, NM_001130020.3
0	8.32	NM_012463, NM_012463.4
0	16.57	NM_004047, NM_004047.5
0	24	NM_001694, NM_001694.4
0	18.08	NM_004691, NM_004691.5
0	9.69	NM_003945, NM_003945.4
0	24	NM_001690, NM_001690.4
0	5.69	NM_001693, NM_001693.4
0	22.14	NM_015994, NM_015994.4
0	24	NM_001198909, NM_001198909.2
0	16.51	NM_004888, NM_004888.4
0	7.27	NM_213620, NM_213620.3
0	6.83	NM_006045, NM_006045.3
0	24	NM_022745, NM_022745.6
0	24	NM_178191, NM_178191.3
0	6.83	NM_001184, NM_001184.4
0	24	NM_013236, NM_013236.4
0	5.64	NM_007245, NM_007245.4
0	2.33	NM_001136262, NM_001136262.2
0	6.55	NM_001698, NM_001698.3
0	24	NM_001127229, NM_001127229.2
0	4.01	NM_004217, NM_004217.4
0	9.13	NM_020371, NM_020371.3
0	14.61	NM_021913, NM_021913.5
0	3.47	NM_014984, NM_014984.4
0	24	NM_004048, NM_004048.4
0	8.74	NM_152490, NM_152490.5
0	1.55	NM_080605, NM_080605.4
0	8.42	NM_012200, NM_012200.4
0	4.61	NM_006876, NM_006876.3
0	6.25	NM_001009905, NM_001009905.3
0	5.39	NM_001497, NM_001497.4
0	15.04	NM_012105, NM_012105.5
0	10.69	NM_032989, NM_032989.3
0	2.89	NM_004282, NM_004282.4
0	2.47	NM_004281, NM_004281.4
0	5.01	NM_004874, NM_004874.4
0	24	NM_080703, NM_080703.3
0	1.66	NM_014952, NM_014952.5
0	3.16	NM_006340, NM_006340.3
0	4.7	NM_018842, NM_018842.5
0	24	NM_003860, NM_003860.4
0	1.94	NM_001173539, NM_001173539.2
0	3.54	NM_000465, NM_000465.4
0	10.14	NM_006317, NM_006317.5
0	8.47	NM_018664, NM_018664.3
0	6.88	NM_004324, NM_004324.4
0	4.79	NM_013448, NM_013448.3
0	3.72	NM_013449, NM_013449.4
0	7.1	NM_024649, NM_024649.5
0	9.23	NM_031885, NM_031885.5
0	8.17	NM_033028, NM_033028.5
0	1.25	NM_152384, NM_152384.3
0	9.79	NM_176824, NM_176824.3
0	13.12	NM_001008405, NM_001008405.4
0	24	NM_005745, NM_005745.8
0	15.78	NM_005872, NM_005872.3
0	5.56	NM_198799, NM_198799.4
0	24	NM_001190, NM_001190.4
0	23.37	NM_078469, NM_078469.3
0	24	NM_000709, NM_000709.4
0	11.84	NM_183050, NM_183050.4
0	8.84	NM_138639, NM_138639.2
0	3.59	NM_001270726, NM_001270726.1
0	2	NM_005178, NM_005178.5
0	3.76	NM_001707, NM_001707.4
0	24	NM_004765, NM_004765.4
0	24	NM_020139, NM_020139.4
0	1.55	NM_016526, NM_016526.5
0	2.91	NM_001003800, NM_001003800.2
0	7.96	NM_139343, NM_139343.3
0	2.12	NM_018688, NM_018688.6
0	6.1	NM_001012271, NM_001012271.2
0	5.74	NM_016252, NM_016252.4
0	2.89	NM_139317, NM_139317.3
0	4.78	NM_000057, NM_000057.4
0	6.27	NM_000386, NM_000386.4
0	24	NM_001487, NM_001487.4
0	6.83	NM_173809, NM_173809.5
0	1.2	NM_212550, NM_212550.5
0	6.86	NM_012388, NM_012388.4
0	24	NM_001253823, NM_001253823.2
0	24	NM_000713, NM_000713.3
0	17.7	NM_006129, NM_006129.5
0	3.62	NM_013979, NM_013979.3
0	7.57	NM_004330, NM_004330.4
0	24	NM_004052, NM_004052.4
0	24	NM_004331, NM_004331.3
0	6.16	NM_138369, NM_138369.3
0	3.67	NM_148894, NM_148894.3
0	24	NM_016074, NM_016074.5
0	24	NM_212552, NM_212552.3
0	7.67	NM_015201, NM_015201.5
0	9.53	NM_004332, NM_004332.4
0	5.47	NM_006085, NM_006085.6
0	5.54	NM_004333, NM_004333.6
0	3.66	NM_006768, NM_006768.5
0	3	NM_152743, NM_152743.4
0	5.6	NM_007300, NM_007300.4
0	9.44	NM_024332, NM_024332.4
0	12.83	NM_001173984, NM_001173984.3
0	3.39	NM_139199, NM_139199.2
0	3.01	NM_023924, NM_023924.5
0	22.69	NM_004899, NM_004899.5
0	2.6	NM_001519, NM_001519.4
0	0.76	NM_018310, NM_018310.4
0	24	NM_015379, NM_015379.5
0	4.38	NM_080626, NM_080626.6
0	2.64	NM_182563, NM_182563.4
0	9.31	NM_018321, NM_018321.4
0	24	NM_018462, NM_018462.5
0	7.64	NM_015399, NM_015399.4
0	9.94	NM_032352, NM_032352.4
0	2.07	NM_015695, NM_015695.3
0	24	NM_001728, NM_001728.4
0	24	NM_004335, NM_004335.4
0	9.93	NM_017797, NM_017797.4
0	5.8	NM_033271, NM_033271.3
0	24	NM_001037637, NM_001037637.2
0	6.72	NM_152265, NM_152265.5
0	5.97	NM_001130914, NM_001130914.2
0	3.97	NM_033637, NM_033637.4
0	8.73	NM_004336, NM_004336.5
0	6.05	NM_004725, NM_004725.4
0	2.39	NM_004053, NM_004053.4
0	20.93	NM_001207069, NM_001207069.2
0	19.8	NM_001159767, NM_001159767.2
0	3.37	NM_001202438, NM_001202438.2
0	7.83	NM_001136200, NM_001136200.2
0	0.57	NM_145306, NM_145306.3
0	5.88	NM_024541, NM_024541.3
0	24	NM_170746, NM_170746.4
0	7.76	NM_001003676, NM_001003676.3
0	11.19	NM_014267, NM_014267.6
0	1.63	NM_001135635, NM_001135635.2
0	3.57	NM_020179, NM_020179.3
0	8.14	NM_024650, NM_024650.3
0	24	NM_001085372, NM_001085372.3
0	1.85	NM_138471, NM_138471.3
0	19.04	NM_021640, NM_021640.4
0	4.26	NM_152261, NM_152261.4
0	7.82	NM_001009894, NM_001009894.3
0	8.09	NM_020374, NM_020374.4
0	2.2	NM_022895, NM_022895.3
0	24	NM_152318, NM_152318.3
0	24	NM_138425, NM_138425.4
0	24	NM_001145199, NM_001145199.2
0	6.33	NM_017924, NM_017924.4
0	24	NM_016039, NM_016039.3
0	1.37	NM_024644, NM_024644.5
0	2.28	NM_001134875, NM_001134875.2
0	24	NM_144597, NM_144597.3
0	24	NM_032366, NM_032366.5
0	14.04	NM_022744, NM_022744.4
0	3.69	NM_025108, NM_025108.3
0	2.08	NM_025187, NM_025187.5
0	3.48	NM_013242, NM_013242.3
0	2.76	NM_001012991, NM_001012991.3
0	0.63	NM_001272051, NM_001272051.2
0	24	NM_001142798, NM_001142798.3
0	2	NM_001193653, NM_001193653.2
0	3.86	NM_025161, NM_025161.6
0	5.3	NM_022344, NM_022344.4
0	3.77	NM_001114118, NM_001114118.3
0	5.74	NM_013326, NM_013326.5
0	24	NM_019107, NM_019107.4
0	2.35	NM_173481, NM_173481.4
0	10.23	NM_017914, NM_017914.4
0	2.5	NM_152482, NM_152482.3
0	24	NM_033520, NM_033520.3
0	6.88	NM_024038, NM_024038.4
0	2.14	NM_001256441, NM_001256441.2
0	1.54	NM_138358, NM_138358.4
0	24	NM_014047, NM_014047.3
0	2.3	NM_001039887, NM_001039887.3
0	24	NM_001100418, NM_001100418.2
0	24	NM_205767, NM_205767.3
0	2.52	NM_001135580, NM_001135580.2
0	24	NM_001212, NM_001212.4
0	4.1	NM_024709, NM_024709.5
0	24	NM_198446, NM_198446.3
0	24	NM_017887, NM_017887.3
0	3.14	NM_152379, NM_152379.4
0	2.58	NM_207356, NM_207356.3
0	3.09	NM_152374, NM_152374.2
0	17.31	NM_001242659, NM_001242659.2
0	1.63	NM_024319, NM_024319.4
0	4.41	NM_198077, NM_198077.4
0	0.74	NM_020317, NM_020317.5
0	1.94	NM_016470, NM_016470.8
0	24	NM_001199534, NM_001199534.2
0	3.87	NM_001271441, NM_001271441.2
0	6.42	NM_004649, NM_004649.8
0	17.48	NM_021254, NM_021254.4
0	12.66	NM_014306, NM_014306.5
0	9.12	NM_173793, NM_173793.5
0	4.68	NM_024520, NM_024520.3
0	9.79	NM_001013649, NM_001013649.4
0	4.03	NM_015412, NM_015412.4
0	5.93	NM_020187, NM_020187.3
0	3.59	NM_024616, NM_024616.3
0	1.82	NM_173552, NM_173552.5
0	24	NM_001017365, NM_001017365.3
0	24	NM_001001701, NM_001001701.4
0	4.3	NM_001008393, NM_001008393.4
0	19.23	NM_001145432, NM_001145432.3
0	10.41	NM_020199, NM_020199.3
0	4.03	NM_001135586, NM_001135586.1
0	2.71	NM_016175, NM_016175.4
0	8.63	NM_175921, NM_175921.6
0	6.22	NM_001161376, NM_001161376.2
0	11.31	NM_024573, NM_024573.3
0	5.2	NM_152734, NM_152734.4
0	1.09	NM_018275, NM_018275.5
0	6.62	NM_023080, NM_023080.3
0	0.95	NM_001013842, NM_001013842.3
0	5.29	NM_032847, NM_032847.3
0	7.51	NM_001001795, NM_001001795.2
0	2.22	NM_016390, NM_016390.4
0	2.48	NM_001012502, NM_001012502.3
0	24	NM_183241, NM_183241.3
0	3.62	NM_016481, NM_016481.5
0	24	NM_024112, NM_024112.4
0	9.4	NM_152420, NM_152420.3
0	5.04	NM_032307, NM_032307.5
0	8.85	NM_016520, NM_016520.3
0	24	NM_032310, NM_032310.5
0	5.53	NM_001218, NM_001218.5
0	7.57	NM_198584, NM_198584.3
0	2.16	NM_001242369, NM_001242369.2
0	4.57	NM_000725, NM_000725.4
0	3.44	NM_001080543, NM_001080543.2
0	5.34	NM_004341, NM_004341.5
0	24	NM_014333, NM_014333.4
0	5.77	NM_020898, NM_020898.3
0	5.9	NM_001261390, NM_001261390.2
0	11.51	NM_033138, NM_033138.4
0	12.71	NM_006888, NM_006888.6
0	24	NM_001743, NM_001743.6
0	8.03	NM_005184, NM_005184.4
0	24	NM_004343, NM_004343.4
0	5.28	NM_153498, NM_153498.4
0	8.07	NM_001221, NM_001221.4
0	3.33	NM_172171, NM_172171.3
0	8.85	NM_001744, NM_001744.6
0	1.28	NM_032294, NM_032294.3
0	16.21	NM_024766, NM_024766.5
0	5.74	NM_001745, NM_001745.4
0	24	NM_015215, NM_015215.4
0	24	NM_001746, NM_001746.4
0	24	NM_006367, NM_006367.4
0	8.7	NM_006366, NM_006366.3
0	24	NM_001747, NM_001747.4
0	24	NM_005186, NM_005186.4
0	19.25	NM_001748, NM_001748.5
0	7.13	NM_014296, NM_014296.3
0	24	NM_001749, NM_001749.4
0	9.08	NM_005898, NM_005898.5
0	24	NM_006135, NM_006135.3
0	24	NM_006136, NM_006136.3
0	2.9	NM_014550, NM_014550.4
0	2.94	NM_014316, NM_014316.4
0	2.18	NM_018210, NM_018210.4
0	13.27	NM_199141, NM_199141.2
0	5.39	NM_001194997, NM_001194997.2
0	24	NM_024537, NM_024537.4
0	4.62	NM_007359, NM_007359.5
0	24	NM_138423, NM_138423.4
0	24	NM_003688, NM_003688.3
0	5.17	NM_020764, NM_020764.4
0	6.99	NM_001226, NM_001226.4
0	4.01	NM_001080125, NM_001080125.2
0	19.95	NM_001752, NM_001752.4
0	10.05	NM_001172896, NM_001172896.2
0	9.66	NM_001755, NM_001755.3
0	4.19	NM_005188, NM_005188.4
0	3.36	NM_170662, NM_170662.5
0	3.01	NM_024814, NM_024814.4
0	5.61	NM_001757, NM_001757.4
0	1.18	NM_005189, NM_005189.3
0	19.91	NM_007276, NM_007276.5
0	0.99	NM_003655, NM_003655.3
0	12.86	NM_012117, NM_012117.3
0	4.78	NM_017721, NM_017721.5
0	3.03	NM_032449, NM_032449.3
0	15.27	NM_004059, NM_004059.5
0	3.91	NM_138414, NM_138414.3
0	24	NM_080667, NM_080667.7
0	6.29	NM_032357, NM_032357.4
0	3.02	NM_173510, NM_173510.4
0	1.9	NM_145265, NM_145265.3
0	2.88	NM_024821, NM_024821.5
0	1.89	NM_199287, NM_199287.3
0	24	NM_199342, NM_199342.4
0	11.32	NM_018246, NM_018246.3
0	12.65	NM_080654, NM_080654.3
0	6.14	NM_144609, NM_144609.3
0	9.71	NM_020198, NM_020198.3
0	7.25	NM_178335, NM_178335.3
0	2.28	NM_001256964, NM_001256964.2
0	3.05	NM_198082, NM_198082.4
0	24	NM_001017928, NM_001017928.4
0	24	NM_014167, NM_014167.5
0	10.33	NM_005436, NM_005436.5
0	2.46	NM_001130147, NM_001130147.2
0	5.83	NM_024098, NM_024098.4
0	2.99	NM_001080414, NM_001080414.4
0	2.34	NM_015603, NM_015603.3
0	2.26	NM_019044, NM_019044.5
0	2.8	NM_018074, NM_018074.6
0	2.19	NM_052848, NM_052848.3
0	5.2	NM_001237, NM_001237.5
0	9.08	NM_031966, NM_031966.4
0	17.88	NM_004701, NM_004701.4
0	2.64	NM_053056, NM_053056.3
0	8.93	NM_001760, NM_001760.5
0	7.7	NM_012142, NM_012142.5
0	3.05	NM_001238, NM_001238.4
0	2.04	NM_001761, NM_001761.3
0	18.48	NM_004060, NM_004060.4
0	1.34	NM_020307, NM_020307.4
0	1.55	NM_030937, NM_030937.6
0	1.86	NM_001240, NM_001240.4
0	7.34	NM_001142300, NM_001142300.2
0	1.45	NM_012118, NM_012118.4
0	24	NM_005125, NM_005125.2
0	24	NM_005998, NM_005998.5
0	24	NM_006430, NM_006430.4
0	24	NM_012073, NM_012073.5
0	17.78	NM_001762, NM_001762.4
0	24	NM_006585, NM_006585.4
0	16.94	NM_133493, NM_133493.5
0	24	NM_004357, NM_004357.5
0	13.92	NM_006016, NM_006016.6
0	10.93	NM_001024736, NM_001024736.2
0	24	NM_016579, NM_016579.4
0	1.15	NM_012099, NM_012099.3
0	22.43	NM_000610, NM_000610.4
0	24	NM_001777, NM_001777.4
0	24	NM_001114752, NM_001114752.3
0	15.6	NM_001144822, NM_001144822.2
0	10.15	NM_203329, NM_203329.3
0	24	NM_001251, NM_001251.3
0	24	NM_004356, NM_004356.4
0	10.78	NM_002231, NM_002231.4
0	3.15	NM_004233, NM_004233.4
0	24	NM_001769, NM_001769.4
0	6.9	NM_001242614, NM_001242614.2
0	24	NM_001785, NM_001785.3
0	2.06	NM_138477, NM_138477.4
0	24	NM_006023, NM_006023.3
0	7.4	NM_001078645, NM_001078645.3
0	6.73	NM_001255, NM_001255.3
0	6.83	NM_004661, NM_004661.4
0	2.03	NM_001789, NM_001789.3
0	5.09	NM_021873, NM_021873.4
0	4.24	NM_001790, NM_001790.5
0	4.45	NM_004359, NM_004359.2
0	24	NM_007065, NM_007065.4
0	1.31	NM_017913, NM_017913.4
0	3.76	NM_015891, NM_015891.3
0	24	NM_001039802, NM_001039802.2
0	0.89	NM_006779, NM_006779.4
0	8.71	NM_003504, NM_003504.5
0	5.89	NM_001253, NM_001253.4
0	3.56	NM_001254, NM_001254.4
0	6.73	NM_024529, NM_024529.5
0	2.68	NM_152562, NM_152562.4
0	5.1	NM_031299, NM_031299.7
0	1.2	NM_017955, NM_017955.4
0	1.92	NM_080668, NM_080668.4
0	3.13	NM_031942, NM_031942.5
0	3.24	NM_001256875, NM_001256875.2
0	4.05	NM_001199054, NM_001199054.2
0	6.03	NM_001786, NM_001786.5
0	2.14	NM_052988, NM_052988.5
0	2.65	NM_024011, NM_024011.4
0	5.93	NM_001798, NM_001798.5
0	2.09	NM_001039803, NM_001039803.3
0	24	NM_004642, NM_004642.4
0	24	NM_004935, NM_004935.4
0	6.25	NM_176096, NM_176096.3
0	21.51	NM_001799, NM_001799.4
0	1.73	NM_001261, NM_001261.4
0	0.75	NM_004064, NM_004064.5
0	7.02	NM_001122630, NM_001122630.2
0	24	NM_058197, NM_058197.5
0	2.17	NM_017632, NM_017632.4
0	24	NM_080656, NM_080656.3
0	2.38	NM_001800, NM_001800.4
0	24	NM_005192, NM_005192.4
0	2.09	NM_207327, NM_207327.5
0	6.71	NM_003818, NM_003818.4
0	2.95	NM_030928, NM_030928.4
0	5.34	NM_001134422, NM_001134422.2
0	2.54	NM_152342, NM_152342.4
0	1.48	NM_005194, NM_005194.4
0	4.36	NM_005195, NM_005195.4
0	8.12	NM_033070, NM_033070.3
0	5.29	NM_001172640, NM_001172640.2
0	2.65	NM_001810, NM_001810.6
0	18.91	NM_022909, NM_022909.4
0	24	NM_024053, NM_024053.5
0	24	NM_181716, NM_181716.3
0	24	NM_001012507, NM_001012507.4
0	3.59	NM_153223, NM_153223.4
0	3.42	NM_001194998, NM_001194998.2
0	5.67	NM_032142, NM_032142.4
0	4.85	NM_018718, NM_018718.3
0	1.43	NM_018140, NM_018140.4
0	4.02	NM_024899, NM_024899.4
0	2.08	NM_022778, NM_022778.5
0	5.55	NM_138363, NM_138363.3
0	11.45	NM_001007794, NM_001007794.3
0	24	NM_016174, NM_016174.5
0	5.09	NM_022766, NM_022766.6
0	4.83	NM_147190, NM_147190.5
0	19.88	NM_001256126, NM_001256126.2
0	3.17	NM_024922, NM_024922.6
0	24	NM_004344, NM_004344.3
0	24	NM_004365, NM_004365.4
0	24	NM_001928, NM_001928.4
0	24	NM_005507, NM_005507.3
0	24	NM_001252383, NM_001252383.2
0	24	NM_001166239, NM_001166239.2
0	5.12	NM_006568, NM_006568.3
0	8.51	NM_001008708, NM_001008708.4
0	2.39	NM_005483, NM_005483.3
0	5.68	NM_005441, NM_005441.3
0	24	NM_203298, NM_203298.3
0	24	NM_213720, NM_213720.3
0	24	NM_016139, NM_016139.4
0	22.11	NM_017812, NM_017812.4
0	24	NM_032309, NM_032309.4
0	24	NM_032343, NM_032343.3
0	7.41	NM_004284, NM_004284.6
0	15.67	NM_001273, NM_001273.5
0	2.79	NM_032221, NM_032221.5
0	9.94	NM_001005735, NM_001005735.2
0	3.7	NM_006387, NM_006387.6
0	5.52	NM_001277, NM_001277.3
0	1.54	NM_005198, NM_005198.5
0	3.7	NM_002768, NM_002768.5
0	2.9	NM_020412, NM_020412.5
0	24	NM_198426, NM_198426.3
0	10.58	NM_014043, NM_014043.4
0	22.08	NM_016079, NM_016079.4
0	24	NM_014169, NM_014169.5
0	24	NM_176812, NM_176812.5
0	12.17	NM_016410, NM_016410.6
0	2.61	NM_024591, NM_024591.5
0	8.59	NM_012124, NM_012124.3
0	24	NM_007236, NM_007236.5
0	8.7	NM_024536, NM_024536.6
0	24	NM_020244, NM_020244.3
0	24	NM_017444, NM_017444.6
0	2.98	NM_130468, NM_130468.4
0	6.07	NM_022092, NM_022092.3
0	2.72	NM_001039690, NM_001039690.5
0	3.48	NM_001206612, NM_001206612.2
0	5.93	NM_001278, NM_001278.5
0	8.51	NM_145165, NM_145165.4
0	3.71	NM_001202559, NM_001202559.1
0	4.83	NM_004804, NM_004804.3
0	5.34	NM_020313, NM_020313.4
0	24	NM_006384, NM_006384.4
0	24	NM_032630, NM_032630.3
0	6.29	NM_001280, NM_001280.3
0	9.07	NM_032830, NM_032830.3
0	24	NM_018464, NM_018464.5
0	16.48	NM_001008388, NM_001008388.5
0	24	NM_001136498, NM_001136498.2
0	5.78	NM_001206999, NM_001206999.2
0	7.49	NM_001098525, NM_001098525.3
0	3.49	NM_152515, NM_152515.5
0	8.49	NM_006825, NM_006825.4
0	10.38	NM_001008938, NM_001008938.4
0	24	NM_001823, NM_001823.5
0	10.56	NM_001826, NM_001826.3
0	24	NM_001827, NM_001827.3
0	8.85	NM_015097, NM_015097.3
0	3.99	NM_007056, NM_007056.3
0	0.87	NM_004366, NM_004366.6
0	1.65	NM_001286, NM_001286.5
0	5.3	NM_001287, NM_001287.6
0	24	NM_001288, NM_001288.5
0	24	NM_013943, NM_013943.3
0	6.54	NM_001195555, NM_001195555.2
0	1.32	NM_003993, NM_003993.4
0	3.2	NM_001130028, NM_001130028.2
0	11.13	NM_006493, NM_006493.4
0	8.47	NM_017882, NM_017882.3
0	12.3	NM_001293, NM_001293.3
0	1.34	NM_006831, NM_006831.3
0	24	NM_006012, NM_006012.4
0	24	NM_001294, NM_001294.4
0	6.74	NM_006660, NM_006660.5
0	5.35	NM_022111, NM_022111.4
0	7.83	NM_001009566, NM_001009566.3
0	24	NM_007096, NM_007096.4
0	24	NM_007097, NM_007097.5
0	24	NM_004859, NM_004859.4
0	3.77	NM_007098, NM_007098.4
0	24	NM_001831, NM_001831.4
0	4.34	NM_015041, NM_015041.3
0	4.87	NM_015229, NM_015229.4
0	10.07	NM_138809, NM_138809.4
0	24	NM_182523, NM_182523.2
0	20.98	NM_020188, NM_020188.5
0	24	NM_016308, NM_016308.3
0	13.17	NM_017801, NM_017801.3
0	4.11	NM_138410, NM_138410.4
0	5.97	NM_001127192, NM_001127192.2
0	7.85	NM_018235, NM_018235.3
0	24	NM_005776, NM_005776.3
0	24	NM_014184, NM_014184.4
0	9.24	NM_004368, NM_004368.4
0	24	NM_001839, NM_001839.5
0	3.96	NM_017623, NM_017623.5
0	2.52	NM_020184, NM_020184.4
0	6.6	NM_017546, NM_017546.5
0	4.35	NM_033133, NM_033133.5
0	3.52	NM_015680, NM_015680.6
0	24	NM_014255, NM_014255.7
0	24	NM_006586, NM_006586.5
0	6.72	NM_152755, NM_152755.2
0	11.32	NM_001040431, NM_001040431.3
0	3.83	NM_018714, NM_018714.3
0	3.21	NM_031431, NM_031431.4
0	15.56	NM_015386, NM_015386.3
0	15.11	NM_001161520, NM_001161520.2
0	5.09	NM_153603, NM_153603.4
0	2.92	NM_032382, NM_032382.5
0	1.98	NM_004645, NM_004645.3
0	1.92	NM_001856, NM_001856.4
0	15.25	NM_001845, NM_001845.6
0	6.96	NM_001848, NM_001848.3
0	2.21	NM_000094, NM_000094.4
0	2.76	NM_001853, NM_001853.4
0	15.39	NM_152516, NM_152516.4
0	24	NM_016144, NM_016144.4
0	5.8	NM_016094, NM_016094.4
0	24	NM_012071, NM_012071.4
0	24	NM_017828, NM_017828.5
0	24	NM_053041, NM_053041.3
0	24	NM_017845, NM_017845.5
0	13.46	NM_014186, NM_014186.4
0	8.33	NM_144589, NM_144589.4
0	24	NM_001098398, NM_001098398.2
0	19.53	NM_004766, NM_004766.3
0	24	NM_007263, NM_007263.4
0	24	NM_016128, NM_016128.4
0	24	NM_012133, NM_012133.6
0	17.29	NM_018405, NM_018405.4
0	8.98	NM_001143887, NM_001143887.2
0	22.43	NM_003653, NM_003653.4
0	24	NM_016129, NM_016129.3
0	24	NM_006833, NM_006833.5
0	3.96	NM_144576, NM_144576.4
0	3.62	NM_025147, NM_025147.5
0	7.55	NM_017421, NM_017421.4
0	11.23	NM_016035, NM_016035.5
0	6.77	NM_032314, NM_032314.4
0	24	NM_182480, NM_182480.3
0	7.03	NM_016138, NM_016138.5
0	7.25	NM_020312, NM_020312.4
0	4.32	NM_052820, NM_052820.4
0	24	NM_021149, NM_021149.5
0	24	NM_004375, NM_004375.5
0	9.47	NM_078470, NM_078470.6
0	24	NM_005694, NM_005694.2
0	2.03	NM_001031617, NM_001031617.3
0	24	NM_001861, NM_001861.6
0	24	NM_004255, NM_004255.4
0	24	NM_001862, NM_001862.3
0	24	NM_004373, NM_004373.4
0	24	NM_001863, NM_001863.5
0	1.25	NM_144613, NM_144613.5
0	24	NM_004374, NM_004374.4
0	24	NM_001866, NM_001866.3
0	24	NM_001867, NM_001867.3
0	24	NM_004074, NM_004074.3
0	24	NM_001873, NM_001873.4
0	24	NM_003909, NM_003909.5
0	3.95	NM_014427, NM_014427.5
0	5.83	NM_153634, NM_153634.3
0	3.95	NM_000097, NM_000097.7
0	4.74	NM_018340, NM_018340.3
0	7.75	NM_013291, NM_013291.3
0	2.74	NM_006693, NM_006693.4
0	8.66	NM_007007, NM_007007.3
0	2.99	NM_024811, NM_024811.4
0	9.21	NM_001876, NM_001876.4
0	4.63	NM_000098, NM_000098.3
0	24	NM_019029, NM_019029.3
0	24	NM_001199723, NM_001199723.2
0	8.78	NM_016302, NM_016302.4
0	1.29	NM_014478, NM_014478.5
0	13.82	NM_006368, NM_006368.5
0	1.26	NM_001039618, NM_001039618.4
0	24	NM_003851, NM_003851.3
0	24	NM_001135101, NM_001135101.3
0	6.6	NM_183011, NM_183011.2
0	6.39	NM_016441, NM_016441.3
0	24	NM_001311, NM_001311.5
0	14.4	NM_014171, NM_014171.6
0	2.59	NM_016823, NM_016823.4
0	3.37	NM_015986, NM_015986.4
0	4.85	NM_016652, NM_016652.6
0	15.44	NM_006371, NM_006371.5
0	3.18	NM_181715, NM_181715.3
0	3.19	NM_022769, NM_022769.5
0	24	NM_004077, NM_004077.3
0	24	NM_003651, NM_003651.5
0	3.11	NM_152221, NM_152221.3
0	10.53	NM_001896, NM_001896.4
0	24	NM_001320, NM_001320.7
0	24	NM_001321, NM_001321.3
0	24	NM_000099, NM_000099.4
0	24	NM_000100, NM_000100.4
0	1.86	NM_001033522, NM_001033522.2
0	8.22	NM_001325, NM_001325.3
0	2.13	NM_015235, NM_015235.3
0	16.62	NM_001326, NM_001326.3
0	5.95	NM_001247989, NM_001247989.2
0	2.76	NM_025099, NM_025099.6
0	2.03	NM_048368, NM_048368.4
0	2.78	NM_001142397, NM_001142397.2
0	24	NM_001903, NM_001903.5
0	24	NM_003798, NM_003798.4
0	24	NM_001904, NM_001904.4
0	9.03	NM_030877, NM_030877.5
0	5.92	NM_014633, NM_014633.5
0	3.83	NM_001907, NM_001907.3
0	24	NM_000308, NM_000308.4
0	24	NM_148170, NM_148170.5
0	24	NM_001909, NM_001909.5
0	24	NM_003793, NM_003793.4
0	24	NM_001912, NM_001912.5
0	24	NM_001336, NM_001336.4
0	1.29	NM_145232, NM_145232.4
0	5.73	NM_001012759, NM_001012759.3
0	24	NM_024040, NM_024040.3
0	13.53	NM_001198777, NM_001198777.2
0	10.32	NM_001008895, NM_001008895.4
0	3.42	NM_001168370, NM_001168370.2
0	2.61	NM_015089, NM_015089.4
0	4.59	NM_015960, NM_015960.3
0	1.3	NM_017748, NM_017748.5
0	6.35	NM_018294, NM_018294.6
0	8.96	NM_001338, NM_001338.5
0	1.64	NM_003467, NM_003467.3
0	3.36	NM_001101654, NM_001101654.2
0	4.76	NM_144970, NM_144970.3
0	24	NM_001017978, NM_001017978.4
0	1.53	NM_001134404, NM_001134404.2
0	9.19	NM_030579, NM_030579.3
0	7.72	NM_016243, NM_016243.3
0	24	NM_016230, NM_016230.4
0	24	NM_000101, NM_000101.4
0	24	NM_001916, NM_001916.5
0	24	NM_018947, NM_018947.6
0	19.31	NM_014608, NM_014608.6
0	3.19	NM_177538, NM_177538.3
0	7.25	NM_030622, NM_030622.8
0	10.73	NM_000786, NM_000786.4
0	3.95	NM_001554, NM_001554.5
0	24	NM_032412, NM_032412.4
0	2.04	NM_004762, NM_004762.6
0	2.61	NM_017457, NM_017457.6
0	2.81	NM_004227, NM_004227.4
0	0.96	NM_152783, NM_152783.5
0	24	NM_001344, NM_001344.4
0	2.4	NM_139179, NM_139179.4
0	7.47	NM_004394, NM_004394.3
0	13.38	NM_004632, NM_004632.4
0	2.41	NM_001348, NM_001348.3
0	24	NM_001349, NM_001349.4
0	14.4	NM_170711, NM_170711.3
0	23.98	NM_014764, NM_014764.4
0	7.97	NM_001122956, NM_001122956.2
0	2.18	NM_016216, NM_016216.4
0	7.42	NM_001918, NM_001918.5
0	24	NM_015420, NM_015420.7
0	3.28	NM_138353, NM_138353.4
0	2.88	NM_015604, NM_015604.4
0	4.86	NM_005828, NM_005828.5
0	4.12	NM_015726, NM_015726.4
0	3.89	NM_173674, NM_173674.3
0	7.62	NM_000788, NM_000788.3
0	2.28	NM_018403, NM_018403.7
0	14.03	NM_014026, NM_014026.6
0	11.16	NM_001012732, NM_001012732.2
0	19.18	NM_006400, NM_006400.5
0	24	NM_024348, NM_024348.4
0	4.77	NM_032486, NM_032486.4
0	24	NM_006571, NM_006571.4
0	4.3	NM_024096, NM_024096.2
0	6.14	NM_020640, NM_020640.4
0	1.5	NM_001014283, NM_001014283.2
0	6.8	NM_001040402, NM_001040402.3
0	6.43	NM_032299, NM_032299.4
0	24	NM_016286, NM_016286.4
0	3.02	NM_024050, NM_024050.6
0	7.2	NM_012137, NM_012137.4
0	24	NM_001923, NM_001923.5
0	2.7	NM_032341, NM_032341.5
0	0.41	NM_019058, NM_019058.4
0	1.21	NM_015086, NM_015086.2
0	24	NM_005216, NM_005216.5
0	24	NM_001355, NM_001355.4
0	24	NM_004939, NM_004939.3
0	0.83	NM_030653, NM_030653.4
0	7.28	NM_001098504, NM_001098504.2
0	8	NM_006773, NM_006773.4
0	6.41	NM_018332, NM_018332.5
0	2.14	NM_007204, NM_007204.5
0	7.19	NM_004728, NM_004728.4
0	7.05	NM_020414, NM_020414.4
0	7.14	NM_017895, NM_017895.8
0	3.23	NM_022779, NM_022779.9
0	13.21	NM_005804, NM_005804.4
0	24	NM_004640, NM_004640.7
0	5.96	NM_001193416, NM_001193416.3
0	3.74	NM_203499, NM_203499.3
0	4.93	NM_016355, NM_016355.4
0	18.09	NM_019070, NM_019070.5
0	7.21	NM_004396, NM_004396.5
0	7.87	NM_024045, NM_024045.2
0	3.99	NM_175066, NM_175066.4
0	7.58	NM_007010, NM_007010.5
0	8.8	NM_001111322, NM_001111322.2
0	2.7	NM_020936, NM_020936.3
0	4.99	NM_019082, NM_019082.4
0	6.19	NM_001257191, NM_001257191.3
0	4.89	NM_021008, NM_021008.4
0	24	NM_001359, NM_001359.2
0	24	NM_020664, NM_020664.4
0	1.27	NM_001270614, NM_001270614.2
0	4.93	NM_003676, NM_003676.4
0	17.27	NM_003472, NM_003472.4
0	4.35	NM_152678, NM_152678.3
0	6.55	NM_018369, NM_018369.3
0	24	NM_015954, NM_015954.4
0	4.69	NM_024295, NM_024295.6
0	8.25	NM_016041, NM_016041.5
0	7.74	NM_015704, NM_015704.3
0	4.46	NM_004401, NM_004401.3
0	3.21	NM_004402, NM_004402.4
0	6.65	NM_004403, NM_004403.3
0	14.83	NM_012079, NM_012079.6
0	1.07	NM_022719, NM_022719.3
0	2.91	NM_152879, NM_152879.3
0	6.13	NM_001105540, NM_001105540.2
0	24	NM_080916, NM_080916.3
0	7.62	NM_014762, NM_014762.4
0	9.31	NM_001360, NM_001360.3
0	24	NM_138452, NM_138452.3
0	4.85	NM_144683, NM_144683.4
0	24	NM_021004, NM_021004.4
0	24	NM_198083, NM_198083.4
0	24	NM_016029, NM_016029.4
0	7.6	NM_015510, NM_015510.5
0	7.16	NM_001358, NM_001358.3
0	3.83	NM_020162, NM_020162.4
0	2.82	NM_021931, NM_021931.4
0	6.83	NM_020865, NM_020865.3
0	4.97	NM_032656, NM_032656.4
0	10.5	NM_024612, NM_024612.5
0	6.18	NM_198963, NM_198963.3
0	4.73	NM_004941, NM_004941.3
0	12.53	NM_005219, NM_005219.5
0	2.45	NM_014388, NM_014388.7
0	7.54	NM_014473, NM_014473.4
0	8.65	NM_032839, NM_032839.3
0	5.72	NM_014953, NM_014953.5
0	5.75	NM_001143688, NM_001143688.3
0	7.28	NM_001363, NM_001363.5
0	14.74	NM_001931, NM_001931.5
0	23.81	NM_000108, NM_000108.5
0	3.97	NM_021120, NM_021120.4
0	18.62	NM_001146015, NM_001146015.2
0	5.52	NM_001933, NM_001933.5
0	5.03	NM_019100, NM_019100.5
0	0.66	NM_007329, NM_007329.3
0	24	NM_033317, NM_033317.5
0	3.19	NM_004943, NM_004943.2
0	1.31	NM_018139, NM_018139.3
0	14.36	NM_001539, NM_001539.4
0	6.7	NM_005880, NM_005880.4
0	3.36	NM_005147, NM_005147.6
0	5.15	NM_018602, NM_018602.4
0	1.19	NM_006145, NM_006145.3
0	24	NM_016306, NM_016306.6
0	4.46	NM_001002762, NM_001002762.5
0	2.87	NM_007034, NM_007034.5
0	3.89	NM_058246, NM_058246.4
0	22.5	NM_022365, NM_022365.4
0	5.38	NM_018198, NM_018198.4
0	24	NM_013238, NM_013238.3
0	3.12	NM_015291, NM_015291.4
0	4.8	NM_018163, NM_018163.3
0	9.89	NM_001015882, NM_001015882.3
0	6.62	NM_006260, NM_006260.5
0	2.73	NM_025219, NM_025219.3
0	24	NM_014280, NM_014280.3
0	5.35	NM_015190, NM_015190.5
0	1.19	NM_001374, NM_001374.3
0	2.94	NM_194249, NM_194249.3
0	17.83	NM_001080849, NM_001080849.3
0	24	NM_001005336, NM_001005336.3
0	13.26	NM_012062, NM_012062.5
0	2.36	NM_015221, NM_015221.4
0	14.08	NM_001130823, NM_001130823.3
0	3.4	NM_006892, NM_006892.4
0	24	NM_199184, NM_199184.2
0	10.18	NM_052951, NM_052951.3
0	5.26	NM_014597, NM_014597.5
0	8.11	NM_020812, NM_020812.4
0	2.5	NM_024872, NM_024872.4
0	2.66	NM_020438, NM_020438.5
0	11.99	NM_017613, NM_017613.4
0	21.31	NM_001382, NM_001382.4
0	24	NM_015448, NM_015448.3
0	2.86	NM_006268, NM_006268.5
0	7.02	NM_001077394, NM_001077394.2
0	24	NM_003859, NM_003859.3
0	10.67	NM_003863, NM_003863.4
0	24	NM_018973, NM_018973.4
0	24	NM_130443, NM_130443.4
0	24	NM_013379, NM_013379.3
0	11.3	NM_015283, NM_015283.2
0	8.59	NM_181787, NM_181787.3
0	13.92	NM_000110, NM_000110.4
0	15.54	NM_001197293, NM_001197293.3
0	19.54	NM_001197294, NM_001197294.2
0	4.42	NM_018370, NM_018370.3
0	24	NM_006442, NM_006442.4
0	10.45	NM_004147, NM_004147.4
0	7.5	NM_001388, NM_001388.5
0	5.82	NM_024094, NM_024094.3
0	3.87	NM_006052, NM_006052.2
0	22.21	NM_001943, NM_001943.5
0	4.92	NM_015548, NM_015548.5
0	2.69	NM_015375, NM_015375.3
0	24	NM_080820, NM_080820.6
0	3.69	NM_016448, NM_016448.4
0	10.23	NM_021907, NM_021907.5
0	6.71	NM_183040, NM_183040.2
0	12.99	NM_012145, NM_012145.4
0	9.54	NM_022156, NM_022156.5
0	2.35	NM_017803, NM_017803.5
0	0.7	NM_004417, NM_004417.4
0	2.88	NM_003584, NM_003584.2
0	9.56	NM_007240, NM_007240.3
0	0.97	NM_004418, NM_004418.4
0	24	NM_017823, NM_017823.5
0	4.37	NM_004090, NM_004090.4
0	1.59	NM_001947, NM_001947.4
0	4.85	NM_001395, NM_001395.4
0	24	NM_001025248, NM_001025248.2
0	3.81	NM_004422, NM_004422.3
0	5.43	NM_004423, NM_004423.4
0	7.72	NM_001376, NM_001376.5
0	18.8	NM_001378, NM_001378.3
0	10.4	NM_016141, NM_016141.4
0	5.66	NM_006141, NM_006141.3
0	1.31	NM_080677, NM_080677.3
0	24	NM_014183, NM_014183.4
0	24	NM_006519, NM_006519.4
0	24	NM_006520, NM_006520.3
0	24	NM_003845, NM_003845.3
0	1.99	NM_001949, NM_001949.5
0	3.77	NM_001950, NM_001950.4
0	5.59	NM_001951, NM_001951.4
0	2.06	NM_004424, NM_004424.5
0	1.98	NM_033083, NM_033083.7
0	5.85	NM_018453, NM_018453.4
0	5.03	NM_001083614, NM_001083614.2
0	24	NM_006824, NM_006824.3
0	6.98	NM_007265, NM_007265.3
0	3.56	NM_014693, NM_014693.4
0	24	NM_001398, NM_001398.3
0	24	NM_004092, NM_004092.4
0	24	NM_001919, NM_001919.4
0	24	NM_001166010, NM_001166010.2
0	8.65	NM_014329, NM_014329.5
0	24	NM_153200, NM_153200.3
0	3.95	NM_001957, NM_001957.4
0	3.88	NM_003797, NM_003797.5
0	24	NM_001402, NM_001402.6
0	24	NM_001958, NM_001958.5
0	24	NM_001037663, NM_001037663.2
0	12.49	NM_004280, NM_004280.5
0	24	NM_001404, NM_001404.5
0	23.94	NM_001961, NM_001961.4
0	3.07	NM_013302, NM_013302.5
0	5.64	NM_021937, NM_021937.5
0	24	NM_145231, NM_145231.4
0	24	NM_001143943, NM_001143943.1
0	24	NM_001039348, NM_001039348.3
0	3.47	NM_024329, NM_024329.6
0	1.31	NM_004428, NM_004428.3
0	1.07	NM_005227, NM_005227.3
0	3.77	NM_001962, NM_001962.3
0	4.66	NM_024580, NM_024580.6
0	3.27	NM_001205301, NM_001205301.2
0	4.34	NM_005228, NM_005228.5
0	2.36	NM_006795, NM_006795.4
0	4.32	NM_014601, NM_014601.4
0	3.98	NM_139265, NM_139265.4
0	4.22	NM_024757, NM_024757.5
0	6.55	NM_006709, NM_006709.5
0	11.8	NM_014335, NM_014335.3
0	17.02	NM_005801, NM_005801.4
0	0.98	NM_001242481, NM_001242481.2
0	23.37	NM_001412, NM_001412.4
0	15.16	NM_005875, NM_005875.3
0	13.7	NM_032025, NM_032025.5
0	12.3	NM_014413, NM_014413.4
0	6.77	NM_001013703, NM_001013703.4
0	13.09	NM_001414, NM_001414.4
0	7.2	NM_014239, NM_014239.4
0	17.38	NM_020365, NM_020365.5
0	8.63	NM_172195, NM_172195.4
0	5.24	NM_003907, NM_003907.3
0	24	NM_001415, NM_001415.4
0	3.68	NM_003750, NM_003750.4
0	14.14	NM_003753, NM_003753.4
0	24	NM_001568, NM_001568.3
0	24	NM_003754, NM_003754.3
0	24	NM_003755, NM_003755.5
0	24	NM_003756, NM_003756.3
0	12.86	NM_003758, NM_003758.4
0	24	NM_013234, NM_013234.4
0	24	NM_016091, NM_016091.4
0	19.58	NM_006360, NM_006360.6
0	13.98	NM_001416, NM_001416.4
0	3.9	NM_001967, NM_001967.4
0	5.87	NM_014740, NM_014740.4
0	8.41	NM_001417, NM_001417.7
0	9.41	NM_004846, NM_004846.4
0	24	NM_004095, NM_004095.4
0	6.24	NM_004096, NM_004096.5
0	18.43	NM_022170, NM_022170.2
0	10.03	NM_002212, NM_002212.4
0	9.9	NM_001419, NM_001419.3
0	5.44	NM_032377, NM_032377.4
0	6.52	NM_001256399, NM_001256399.2
0	11.33	NM_001242828, NM_001242828.2
0	9.16	NM_001242875, NM_001242875.3
0	6.69	NM_018091, NM_018091.6
0	13.65	NM_019040, NM_019040.5
0	24	NM_175063, NM_175063.6
0	10.8	NM_014673, NM_014673.5
0	22.51	NM_018447, NM_018447.4
0	24	NM_016454, NM_016454.4
0	24	NM_020154, NM_020154.3
0	6.45	NM_006067, NM_006067.5
0	2.65	NM_001166131, NM_001166131.2
0	5.97	NM_006331, NM_006331.8
0	8.63	NM_001008707, NM_001008707.2
0	6.8	NM_153265, NM_153265.3
0	13.68	NM_001424, NM_001424.6
0	24	NM_001425, NM_001425.3
0	4.64	NM_015036, NM_015036.3
0	24	NM_004435, NM_004435.2
0	4.63	NM_173627, NM_173627.5
0	0.31	NM_001042573, NM_001042573.3
0	3.18	NM_032140, NM_032140.3
0	24	NM_001976, NM_001976.5
0	13.57	NM_021204, NM_021204.5
0	11.67	NM_202758, NM_202758.5
0	24	NM_006208, NM_006208.3
0	24	NM_207043, NM_207043.2
0	2.22	NM_144679, NM_144679.3
0	24	NM_020189, NM_020189.6
0	19.97	NM_001431, NM_001431.4
0	3.61	NM_019114, NM_019114.5
0	3.05	NM_017549, NM_017549.5
0	4.08	NM_004431, NM_004431.5
0	6.79	NM_017449, NM_017449.5
0	24	NM_000120, NM_000120.4
0	2.77	NM_031308, NM_031308.4
0	24	NM_004446, NM_004446.3
0	4.48	NM_001258376, NM_001258376.2
0	4.36	NM_022772, NM_022772.4
0	5.41	NM_033505, NM_033505.4
0	7.15	NM_005702, NM_005702.4
0	2.17	NM_001983, NM_001983.4
0	5.33	NM_000400, NM_000400.4
0	1.77	NM_006494, NM_006494.4
0	24	NM_001031711, NM_001031711.3
0	24	NM_198398, NM_198398.2
0	24	NM_004450, NM_004450.3
0	5.22	NM_153332, NM_153332.4
0	3.7	NM_001142725, NM_001142725.2
0	18.08	NM_024066, NM_024066.3
0	2.78	NM_207332, NM_207332.3
0	24	NM_015701, NM_015701.5
0	12.18	NM_007175, NM_007175.8
0	22.39	NM_024896, NM_024896.3
0	20.37	NM_014584, NM_014584.3
0	24	NM_006817, NM_006817.4
0	7.38	NM_001017420, NM_001017420.3
0	24	NM_001984, NM_001984.2
0	3.16	NM_012291, NM_012291.5
0	3.65	NM_024939, NM_024939.3
0	24	NM_001184796, NM_001184796.2
0	20.31	NM_020728, NM_020728.3
0	24	NM_000126, NM_000126.4
0	24	NM_001985, NM_001985.3
0	24	NM_014297, NM_014297.5
0	10.63	NM_018638, NM_018638.5
0	5.33	NM_005665, NM_005665.6
0	24	NM_016337, NM_016337.3
0	1.04	NM_001988, NM_001988.4
0	18.95	NM_013986, NM_013986.4
0	6.98	NM_001024924, NM_001024924.2
0	9.12	NM_018303, NM_018303.6
0	24	NM_021807, NM_021807.4
0	10.24	NM_015189, NM_015189.3
0	6.09	NM_001145297, NM_001145297.4
0	1.17	NM_175876, NM_175876.5
0	2.41	NM_005107, NM_005107.4
0	24	NM_016046, NM_016046.5
0	7.12	NM_001001998, NM_001001998.3
0	3.36	NM_014285, NM_014285.7
0	4.74	NM_016042, NM_016042.4
0	1.48	NM_019037, NM_019037.3
0	24	NM_020158, NM_020158.4
0	2.68	NM_058219, NM_058219.3
0	24	NM_181503, NM_181503.3
0	8.58	NM_001034194, NM_001034194.2
0	8.64	NM_004456, NM_004456.5
0	5.1	NM_003379, NM_003379.5
0	2.05	NM_005242, NM_005242.6
0	24	NM_001444, NM_001444.3
0	1.14	NM_003824, NM_003824.4
0	23.94	NM_013402, NM_013402.7
0	13.42	NM_004265, NM_004265.4
0	24	NM_021727, NM_021727.5
0	3.75	NM_014613, NM_014613.3
0	24	NM_000137, NM_000137.4
0	24	NM_016044, NM_016044.3
0	5.95	NM_031452, NM_031452.4
0	5.61	NM_019018, NM_019018.3
0	3.16	NM_138348, NM_138348.6
0	1.65	NM_001025780, NM_001025780.3
0	2.72	NM_021214, NM_021214.2
0	4.07	NM_014719, NM_014719.3
0	4.48	NM_024556, NM_024556.4
0	4.16	NM_032448, NM_032448.3
0	3.31	NM_017848, NM_017848.6
0	24	NM_001078171, NM_001078171.2
0	24	NM_001078172, NM_001078172.2
0	6.38	NM_052966, NM_052966.4
0	1.21	NM_144635, NM_144635.5
0	3.18	NM_024293, NM_024293.6
0	2.83	NM_022749, NM_022749.7
0	24	NM_014367, NM_014367.4
0	7.67	NM_001001710, NM_001001710.3
0	3.64	NM_015159, NM_015159.3
0	4.03	NM_001009993, NM_001009993.4
0	24	NM_023933, NM_023933.3
0	6.02	NM_199133, NM_199133.4
0	2.53	NM_032182, NM_032182.4
0	8.45	NM_173607, NM_173607.5
0	8.6	NM_024946, NM_024946.4
0	1.21	NM_001190946, NM_001190946.3
0	24	NM_138418, NM_138418.4
0	17.9	NM_207368, NM_207368.5
0	6.33	NM_207318, NM_207318.4
0	24	NM_017832, NM_017832.4
0	4.15	NM_058190, NM_058190.4
0	5.98	NM_001112736, NM_001112736.2
0	24	NM_013300, NM_013300.3
0	2.19	NM_001184940, NM_001184940.2
0	1.4	NM_020447, NM_020447.5
0	7.35	NM_015262, NM_015262.3
0	5.77	NM_014077, NM_014077.4
0	12.48	NM_021806, NM_021806.4
0	0.9	NM_017633, NM_017633.3
0	9.19	NM_001256763, NM_001256763.2
0	24	NM_004699, NM_004699.4
0	2.49	NM_024792, NM_024792.3
0	5.73	NM_152274, NM_152274.5
0	3.71	NM_019013, NM_019013.3
0	8.37	NM_001270384, NM_001270384.2
0	1.42	NM_032809, NM_032809.4
0	1.67	NM_030919, NM_030919.3
0	2.93	NM_198488, NM_198488.5
0	1.36	NM_201400, NM_201400.4
0	6.15	NM_001098784, NM_001098784.2
0	13.94	NM_145269, NM_145269.5
0	24	NM_016062, NM_016062.4
0	24	NM_173611, NM_173611.4
0	24	NM_174905, NM_174905.4
0	4.33	NM_000135, NM_000135.4
0	4.76	NM_001018115, NM_001018115.3
0	3.35	NM_021922, NM_021922.3
0	6.01	NM_004629, NM_004629.2
0	17.6	NM_018062, NM_018062.4
0	8.74	NM_032228, NM_032228.6
0	4.22	NM_004461, NM_004461.3
0	24	NM_005687, NM_005687.5
0	6.86	NM_004104, NM_004104.5
0	24	NM_001997, NM_001997.5
0	24	NM_001436, NM_001436.4
0	0.89	NM_017556, NM_017556.4
0	24	NM_006486, NM_006486.3
0	11.89	NM_000138, NM_000138.5
0	1.6	NM_017703, NM_017703.3
0	1.9	NM_024963, NM_024963.6
0	2.26	NM_012162, NM_012162.4
0	4.34	NM_024907, NM_024907.7
0	4.05	NM_033624, NM_033624.3
0	3.89	NM_015176, NM_015176.4
0	10.1	NM_033406, NM_033406.4
0	1.97	NM_032145, NM_032145.5
0	1.63	NM_024735, NM_024735.5
0	4.67	NM_030793, NM_030793.5
0	18.43	NM_033484, NM_033484.3
0	8.23	NM_012179, NM_012179.4
0	4.81	NM_012300, NM_012300.3
0	5.46	NM_153348, NM_153348.3
0	7	NM_032301, NM_032301.3
0	8.3	NM_015962, NM_015962.5
0	2.06	NM_033449, NM_033449.3
0	7.73	NM_004462, NM_004462.5
0	24	NM_001031734, NM_001031734.4
0	24	NM_001258012, NM_001258012.4
0	18.43	NM_001012515, NM_001012515.4
0	2.73	NM_004111, NM_004111.6
0	8.6	NM_017671, NM_017671.5
0	8.97	NM_001134999, NM_001134999.2
0	9.96	NM_001042548, NM_001042548.2
0	14.53	NM_007045, NM_007045.4
0	24	NM_213647, NM_213647.3
0	24	NM_000143, NM_000143.4
0	24	NM_001159702, NM_001159702.3
0	8.61	NM_001450, NM_001450.4
0	3.53	NM_004468, NM_004468.5
0	4.95	NM_013241, NM_013241.3
0	24	NM_198897, NM_198897.2
0	2.98	NM_001080472, NM_001080472.4
0	24	NM_021939, NM_021939.4
0	24	NM_001143782, NM_001143782.2
0	4.18	NM_015258, NM_015258.2
0	24	NM_000801, NM_000801.5
0	24	NM_001135208, NM_001135208.2
0	24	NM_002013, NM_002013.4
0	12.88	NM_002014, NM_002014.4
0	7.61	NM_001145777, NM_001145777.2
0	24	NM_012181, NM_012181.5
0	24	NM_007270, NM_007270.5
0	24	NM_001110556, NM_001110556.2
0	10.27	NM_001164317, NM_001164317.2
0	18.93	NM_005803, NM_005803.4
0	16.57	NM_004475, NM_004475.3
0	3.73	NM_014053, NM_014053.4
0	4.01	NM_175736, NM_175736.5
0	23.96	NM_002024, NM_002024.6
0	3.67	NM_024619, NM_024619.4
0	6.68	NM_015033, NM_015033.3
0	4.69	NM_001024948, NM_001024948.3
0	2.99	NM_015308, NM_015308.5
0	17.02	NM_002027, NM_002027.3
0	5.05	NM_144600, NM_144600.4
0	5.1	NM_005438, NM_005438.5
0	0.97	NM_005253, NM_005253.4
0	1.12	NM_001451, NM_001451.3
0	3.25	NM_001037165, NM_001037165.2
0	3.06	NM_004514, NM_004514.4
0	8.04	NM_017547, NM_017547.4
0	9.04	NM_024955, NM_024955.6
0	6.68	NM_145246, NM_145246.5
0	0.9	NM_012083, NM_012083.3
0	19.08	NM_004477, NM_004477.3
0	2.07	NM_031904, NM_031904.5
0	10.56	NM_003088, NM_003088.4
0	24	NM_007085, NM_007085.5
0	2.48	NM_005860, NM_005860.3
0	11.66	NM_015082, NM_015082.2
0	24	NM_002032, NM_002032.3
0	24	NM_000146, NM_000146.4
0	11.55	NM_001080432, NM_001080432.3
0	1.7	NM_013393, NM_013393.3
0	5.21	NM_015050, NM_015050.3
0	10.96	NM_003902, NM_003902.5
0	13.03	NM_003934, NM_003934.2
0	24	NM_032020, NM_032020.5
0	1.92	NM_145059, NM_145059.3
0	15.73	NM_173794, NM_173794.4
0	24	NM_198472, NM_198472.3
0	24	NM_001170634, NM_001170634.1
0	1.78	NM_173540, NM_173540.3
0	10.2	NM_181425, NM_181425.3
0	2.65	NM_004860, NM_004860.4
0	24	NM_001164605, NM_001164605.2
0	2.1	NM_016263, NM_016263.4
0	4.92	NM_005754, NM_005754.3
0	5.78	NM_203505, NM_203505.3
0	24	NM_138387, NM_138387.4
0	24	NM_001042351, NM_001042351.3
0	24	NM_007278, NM_007278.2
0	2.12	NM_031412, NM_031412.4
0	24	NM_007285, NM_007285.7
0	1.74	NM_004961, NM_004961.4
0	0.96	NM_001924, NM_001924.4
0	1.16	NM_015675, NM_015675.4
0	24	NM_052850, NM_052850.4
0	24	NM_000154, NM_000154.2
0	4.77	NM_001001556, NM_001001556.3
0	7.9	NM_138801, NM_138801.3
0	24	NM_000512, NM_000512.5
0	7.75	NM_198321, NM_198321.4
0	12.89	NM_004481, NM_004481.5
0	10.71	NM_017423, NM_017423.3
0	12.02	NM_000155, NM_000155.4
0	24	NM_138924, NM_138924.3
0	4	NM_022041, NM_022041.4
0	24	NM_198335, NM_198335.4
0	13.22	NM_018983, NM_018983.4
0	18.71	NM_002047, NM_002047.4
0	9.8	NM_000819, NM_000819.5
0	2.29	NM_001481, NM_001481.3
0	7.27	NM_017660, NM_017660.5
0	3.64	NM_020699, NM_020699.4
0	3.26	NM_176818, NM_176818.3
0	24	NM_001483, NM_001483.3
0	24	NM_000158, NM_000158.4
0	18.52	NM_001171690, NM_001171690.2
0	12.09	NM_000159, NM_000159.4
0	24	NM_005258, NM_005258.3
0	9.44	NM_002061, NM_002061.4
0	5.25	NM_006836, NM_006836.2
0	24	NM_004483, NM_004483.5
0	8.64	NM_018972, NM_018972.4
0	24	NM_016641, NM_016641.4
0	5.53	NM_005811, NM_005811.5
0	2.12	NM_004864, NM_004864.4
0	6.88	NM_001493, NM_001493.3
0	24	NM_001494, NM_001494.4
0	5.37	NM_003616, NM_003616.3
0	1.54	NM_015721, NM_015721.3
0	5.03	NM_015465, NM_015465.5
0	2.82	NM_015949, NM_015949.3
0	1.32	NM_005262, NM_005262.3
0	13.25	NM_024996, NM_024996.7
0	4.49	NM_001244710, NM_001244710.2
0	4.02	NM_005110, NM_005110.4
0	3.85	NM_015044, NM_015044.4
0	15.34	NM_001199815, NM_001199815.2
0	2.69	NM_000821, NM_000821.7
0	24	NM_003878, NM_003878.3
0	2.78	NM_024835, NM_024835.5
0	24	NM_014394, NM_014394.3
0	3.2	NM_017896, NM_017896.3
0	8.31	NM_138785, NM_138785.5
0	2.2	NM_021067, NM_021067.5
0	14.16	NM_016095, NM_016095.3
0	2.9	NM_001126129, NM_001126129.2
0	7.93	NM_032336, NM_032336.3
0	4.66	NM_001085454, NM_001085454.2
0	3.64	NM_057169, NM_057169.5
0	4.62	NM_000165, NM_000165.5
0	4.01	NM_001039547, NM_001039547.3
0	24	NM_000404, NM_000404.4
0	10.9	NM_138342, NM_138342.4
0	8.18	NM_001003722, NM_001003722.2
0	19.64	NM_001145667, NM_001145667.2
0	1.93	NM_138465, NM_138465.4
0	5.01	NM_022343, NM_022343.4
0	10.19	NM_053274, NM_053274.3
0	24	NM_006708, NM_006708.3
0	11.14	NM_016080, NM_016080.4
0	24	NM_002064, NM_002064.3
0	24	NM_001199868, NM_001199868.2
0	14.92	NM_016417, NM_016417.3
0	5.91	NM_014905, NM_014905.5
0	21.04	NM_024656, NM_024656.4
0	9.04	NM_016433, NM_016433.4
0	8.61	NM_015710, NM_015710.5
0	22.04	NM_005271, NM_005271.5
0	7.32	NM_032569, NM_032569.4
0	24	NM_000405, NM_000405.5
0	24	NM_001500, NM_001500.4
0	1.6	NM_012384, NM_012384.5
0	13.89	NM_004124, NM_004124.3
0	3.98	NM_016573, NM_016573.4
0	6.6	NM_015895, NM_015895.5
0	2.61	NM_021971, NM_021971.4
0	7.04	NM_003875, NM_003875.3
0	3.42	NM_002067, NM_002067.5
0	3.07	NM_006572, NM_006572.6
0	3.22	NM_002069, NM_002069.6
0	17.23	NM_002070, NM_002070.4
0	13.67	NM_006496, NM_006496.4
0	0.29	NM_053004, NM_053004.3
0	24	NM_005273, NM_005273.4
0	24	NM_006098, NM_006098.5
0	6.14	NM_021629, NM_021629.4
0	7.98	NM_016194, NM_016194.4
0	2.24	NM_005476, NM_005476.7
0	24	NM_001017998, NM_001017998.4
0	24	NM_004126, NM_004126.4
0	21.59	NM_018841, NM_018841.6
0	8.95	NM_005275, NM_005275.5
0	6.09	NM_013285, NM_013285.3
0	5.29	NM_005471, NM_005471.5
0	5.74	NM_138335, NM_138335.3
0	6.86	NM_198066, NM_198066.4
0	1.01	NM_032520, NM_032520.5
0	24	NM_002076, NM_002076.4
0	4.2	NM_004486, NM_004486.6
0	4.73	NM_005113, NM_005113.4
0	24	NM_016548, NM_016548.4
0	3.45	NM_018178, NM_018178.6
0	7.95	NM_016072, NM_016072.5
0	2.84	NM_020399, NM_020399.4
0	2.08	NM_152281, NM_152281.3
0	3.33	NM_031899, NM_031899.4
0	5.49	NM_015530, NM_015530.5
0	4.63	NM_004287, NM_004287.5
0	6.02	NM_002079, NM_002079.3
0	24	NM_002080, NM_002080.4
0	24	NM_003801, NM_003801.4
0	2.88	NM_018025, NM_018025.3
0	3.71	NM_001002909, NM_001002909.4
0	7.41	NM_002081, NM_002081.3
0	12.05	NM_015141, NM_015141.4
0	12.68	NM_001083112, NM_001083112.3
0	11.05	NM_020806, NM_020806.5
0	24	NM_000175, NM_000175.5
0	5.4	NM_015698, NM_015698.6
0	2.13	NM_018066, NM_018066.4
0	9.67	NM_001164372, NM_001164372.2
0	15.84	NM_001080452, NM_001080452.2
0	0.96	NM_024980, NM_024980.5
0	3.72	NM_003979, NM_003979.4
0	17.27	NM_004489, NM_004489.5
0	3.01	NM_001145638, NM_001145638.3
0	24	NM_201397, NM_201397.3
0	24	NM_001039848, NM_001039848.4
0	8.21	NM_001008397, NM_001008397.4
0	2.4	NM_020895, NM_020895.5
0	3.14	NM_002086, NM_002086.5
0	24	NM_012203, NM_012203.2
0	10.5	NM_000837, NM_000837.2
0	5.14	NM_020137, NM_020137.5
0	4.56	NM_001004106, NM_001004106.3
0	24	NM_002087, NM_002087.4
0	3.61	NM_025196, NM_025196.4
0	1.81	NM_152407, NM_152407.4
0	9.08	NM_002092, NM_002092.4
0	2.3	NM_024719, NM_024719.4
0	2.37	NM_031485, NM_031485.4
0	1.55	NM_031965, NM_031965.2
0	4.58	NM_019884, NM_019884.3
0	2.94	NM_016472, NM_016472.5
0	10	NM_000637, NM_000637.5
0	24	NM_000178, NM_000178.4
0	24	NM_001143679, NM_001143679.2
0	24	NM_000850, NM_000850.5
0	24	NM_000852, NM_000852.4
0	24	NM_145870, NM_145870.3
0	8.34	NM_015859, NM_015859.4
0	5.33	NM_001514, NM_001514.6
0	2.12	NM_005513, NM_005513.3
0	6.29	NM_002095, NM_002095.6
0	4.83	NM_002096, NM_002096.3
0	12.12	NM_004128, NM_004128.3
0	5.94	NM_001516, NM_001516.5
0	4.05	NM_001199207, NM_001199207.2
0	24	NM_002097, NM_002097.3
0	7.18	NM_001520, NM_001520.4
0	4.26	NM_001521, NM_001521.4
0	7.04	NM_012086, NM_012086.5
0	2.13	NM_012204, NM_012204.4
0	4.38	NM_001122823, NM_001122823.2
0	5.19	NM_004286, NM_004286.5
0	3.54	NM_033107, NM_033107.4
0	2.42	NM_019096, NM_019096.5
0	2.75	NM_133644, NM_133644.4
0	4.3	NM_012341, NM_012341.3
0	2.16	NM_015666, NM_015666.4
0	8	NM_014170, NM_014170.4
0	3.82	NM_016426, NM_016426.7
0	24	NM_000181, NM_000181.4
0	23.08	NM_004130, NM_004130.4
0	8.13	NM_002103, NM_002103.5
0	9.5	NM_006026, NM_006026.4
0	24	NM_138635, NM_138635.3
0	2.56	NM_002105, NM_002105.3
0	24	NM_138610, NM_138610.3
0	24	NM_002106, NM_002106.4
0	6.89	NM_005324, NM_005324.5
0	24	NM_001184705, NM_001184705.4
0	24	NM_000182, NM_000182.5
0	24	NM_000183, NM_000183.3
0	7.48	NM_005326, NM_005326.6
0	24	NM_032304, NM_032304.4
0	9.31	NM_002109, NM_002109.6
0	3.82	NM_012208, NM_012208.4
0	24	NM_003642, NM_003642.4
0	24	NM_138443, NM_138443.4
0	4.53	NM_018097, NM_018097.3
0	24	NM_001166269, NM_001166269.2
0	5.22	NM_015302, NM_015302.2
0	2.49	NM_033417, NM_033417.2
0	6.42	NM_005333, NM_005333.5
0	24	NM_017885, NM_017885.4
0	13.92	NM_001194, NM_001194.4
0	24	NM_004964, NM_004964.3
0	1.15	NM_032019, NM_032019.6
0	16.82	NM_001527, NM_001527.4
0	11.98	NM_003883, NM_003883.4
0	4.97	NM_006044, NM_006044.4
0	22.03	NM_001166419, NM_001166419.2
0	24	NM_016063, NM_016063.3
0	24	NM_004494, NM_004494.3
0	6.68	NM_001001520, NM_001001520.3
0	2.7	NM_001135565, NM_001135565.2
0	8.22	NM_017802, NM_017802.4
0	7.32	NM_015473, NM_015473.4
0	2.84	NM_022070, NM_022070.5
0	14.77	NM_015987, NM_015987.5
0	7.65	NM_024602, NM_024602.6
0	9.31	NM_018063, NM_018063.5
0	4.38	NM_004667, NM_004667.6
0	16.78	NM_016323, NM_016323.4
0	1.96	NM_014685, NM_014685.4
0	2.74	NM_001165967, NM_001165967.2
0	24	NM_000520, NM_000520.6
0	24	NM_000521, NM_000521.4
0	1.8	NM_001040708, NM_001040708.2
0	8.59	NM_000410, NM_000410.4
0	6.66	NM_004712, NM_004712.5
0	6.59	NM_152419, NM_152419.3
0	24	NM_152740, NM_152740.4
0	17.38	NM_014362, NM_014362.4
0	5.45	NM_001530, NM_001530.4
0	2.53	NM_017902, NM_017902.3
0	0.67	NM_013332, NM_013332.4
0	24	NM_005340, NM_005340.7
0	24	NM_032593, NM_032593.3
0	5.88	NM_138571, NM_138571.5
0	5.1	NM_005338, NM_005338.7
0	4.07	NM_003959, NM_003959.3
0	9.06	NM_003609, NM_003609.5
0	14.6	NM_005319, NM_005319.4
0	2.15	NM_003512, NM_003512.4
0	2.12	NM_021064, NM_021064.5
0	3.16	NM_003514, NM_003514.2
0	7.58	NM_021063, NM_021063.4
0	4.75	NM_003518, NM_003518.4
0	10.23	NM_021058, NM_021058.4
0	5.97	NM_003527, NM_003527.4
0	3.14	NM_003536, NM_003536.3
0	5.33	NM_003542, NM_003542.4
0	2.2	NM_003543, NM_003543.4
0	24	NM_003528, NM_003528.3
0	2.64	NM_033445, NM_033445.3
0	1.95	NM_018410, NM_018410.5
0	24	NM_001242758, NM_001242758.1
0	24	NM_005514, NM_005514.8
0	24	NM_002117, NM_002117.6
0	12.89	NM_005516, NM_005516.6
0	17.09	NM_003071, NM_003071.4
0	0.98	NM_021958, NM_021958.4
0	19.74	NM_178582, NM_178582.3
0	10.08	NM_000190, NM_000190.4
0	15.97	NM_006339, NM_006339.3
0	24	NM_145901, NM_145901.3
0	9.15	NM_001130688, NM_001130688.1
0	12.54	NM_005342, NM_005342.4
0	8.16	NM_000191, NM_000191.3
0	3.57	NM_000859, NM_000859.3
0	6.22	NM_001098272, NM_001098272.3
0	24	NM_004965, NM_004965.7
0	24	NM_005517, NM_005517.4
0	24	NM_001201362, NM_001201362.2
0	4.58	NM_006353, NM_006353.3
0	24	NM_001142556, NM_001142556.2
0	4.41	NM_002133, NM_002133.3
0	5.57	NM_144570, NM_144570.3
0	4.24	NM_006895, NM_006895.3
0	2.57	NM_006805, NM_006805.4
0	24	NM_031157, NM_031157.4
0	24	NM_031243, NM_031243.3
0	24	NM_194247, NM_194247.3
0	6.51	NM_031266, NM_031266.3
0	24	NM_031314, NM_031314.3
0	24	NM_031370, NM_031370.3
0	15.88	NM_001257293, NM_001257293.2
0	8.66	NM_019597, NM_019597.5
0	21.64	NM_012207, NM_012207.3
0	24	NM_002140, NM_002140.5
0	24	NM_001533, NM_001533.3
0	24	NM_005968, NM_005968.5
0	15.01	NM_001102398, NM_001102398.3
0	15.52	NM_031844, NM_031844.3
0	10.06	NM_007040, NM_007040.6
0	9.6	NM_001079559, NM_001079559.3
0	2.79	NM_013312, NM_013312.3
0	4.39	NM_032410, NM_032410.4
0	2.54	NM_018951, NM_018951.4
0	2.02	NM_004502, NM_004502.4
0	0.96	NM_014212, NM_014212.4
0	4.08	NM_016287, NM_016287.5
0	2.1	NM_032756, NM_032756.4
0	24	NM_000194, NM_000194.3
0	0.79	NM_024747, NM_024747.6
0	24	NM_005836, NM_005836.3
0	3.99	NM_022460, NM_022460.4
0	24	NM_001537, NM_001537.4
0	24	NM_001136180, NM_001136180.2
0	10.92	NM_172002, NM_172002.5
0	24	NM_004493, NM_004493.3
0	14.53	NM_016245, NM_016245.5
0	24	NM_016142, NM_016142.3
0	3.39	NM_031463, NM_031463.5
0	24	NM_032303, NM_032303.5
0	15.58	NM_001271970, NM_001271970.2
0	24	NM_003299, NM_003299.3
0	7.4	NM_006948, NM_006948.5
0	1.72	NM_005345, NM_005345.6
0	1.3	NM_005346, NM_005346.6
0	20.78	NM_002154, NM_002154.4
0	7.46	NM_014278, NM_014278.4
0	10.55	NM_005347, NM_005347.5
0	9.93	NM_006597, NM_006597.6
0	21.8	NM_004134, NM_004134.7
0	24	NM_001540, NM_001540.5
0	24	NM_016126, NM_016126.4
0	2.37	NM_014365, NM_014365.3
0	3.77	NM_024610, NM_024610.6
0	24	NM_199440, NM_199440.2
0	24	NM_002157, NM_002157.3
0	4.1	NM_005529, NM_005529.7
0	9.02	NM_006644, NM_006644.4
0	24	NM_002775, NM_002775.5
0	5.88	NM_145074, NM_145074.2
0	7.66	NM_004507, NM_004507.4
0	24	NM_001243526, NM_001243526.2
0	19.33	NM_001039613, NM_001039613.3
0	24	NM_018060, NM_018060.4
0	1.05	NM_001010867, NM_001010867.4
0	12.2	NM_002162, NM_002162.5
0	1.09	NM_003259, NM_003259.4
0	4.34	NM_012405, NM_012405.4
0	24	NM_001545, NM_001545.3
0	24	NM_181353, NM_181353.3
0	8.13	NM_002167, NM_002167.5
0	24	NM_005896, NM_005896.4
0	24	NM_002168, NM_002168.4
0	10.97	NM_005530, NM_005530.3
0	24	NM_006899, NM_006899.5
0	24	NM_174869, NM_174869.3
0	7.66	NM_004508, NM_004508.4
0	1.18	NM_003897, NM_003897.4
0	24	NM_016097, NM_016097.5
0	0.59	NM_016545, NM_016545.5
0	1.54	NM_001136265, NM_001136265.2
0	24	NM_145249, NM_145249.3
0	24	NM_032036, NM_032036.3
0	24	NM_006332, NM_006332.5
0	24	NM_005533, NM_005533.5
0	5.06	NM_006820, NM_006820.4
0	24	NM_003641, NM_003641.5
0	24	NM_021034, NM_021034.3
0	7.19	NM_000416, NM_000416.3
0	7.44	NM_052985, NM_052985.4
0	6.33	NM_014714, NM_014714.4
0	24	NM_001255995, NM_001255995.3
0	18.06	NM_018010, NM_018010.4
0	2.37	NM_006546, NM_006546.4
0	8.13	NM_006548, NM_006548.6
0	8.26	NM_000876, NM_000876.4
0	24	NM_000597, NM_000597.3
0	24	NM_002178, NM_002178.3
0	24	NM_001553, NM_001553.3
0	1.69	NM_002180, NM_002180.3
0	24	NM_006083, NM_006083.4
0	9.33	NM_153687, NM_153687.4
0	4.16	NM_000628, NM_000628.5
0	24	NM_001560, NM_001560.3
0	2.66	NM_014339, NM_014339.7
0	7.67	NM_018725, NM_018725.4
0	6.97	NM_153461, NM_153461.4
0	10.99	NM_001562, NM_001562.4
0	5.98	NM_004843, NM_004843.4
0	24	NM_001012631, NM_001012631.4
0	3.93	NM_002185, NM_002185.5
0	10.34	NM_017620, NM_017620.3
0	17.73	NM_001014795, NM_001014795.3
0	8.89	NM_030768, NM_030768.3
0	24	NM_006839, NM_006839.3
0	4.44	NM_033416, NM_033416.3
0	7.11	NM_001144878, NM_001144878.2
0	9.78	NM_014214, NM_014214.3
0	8.37	NM_000883, NM_000883.4
0	24	NM_000884, NM_000884.3
0	7.38	NM_176877, NM_176877.5
0	2.91	NM_001040694, NM_001040694.2
0	6	NM_022489, NM_022489.4
0	6.68	NM_019071, NM_019071.3
0	3.57	NM_001127582, NM_001127582.2
0	1.45	NM_032329, NM_032329.6
0	2.61	NM_021218, NM_021218.3
0	4.78	NM_031288, NM_031288.4
0	6.97	NM_001098817, NM_001098817.2
0	11.46	NM_173618, NM_173618.3
0	3.87	NM_005540, NM_005540.3
0	3.18	NM_005542, NM_005542.6
0	24	NM_002195, NM_002195.2
0	7.56	NM_033547, NM_033547.4
0	6.14	NM_001039938, NM_001039938.2
0	18.83	NM_017864, NM_017864.4
0	16.9	NM_024658, NM_024658.4
0	10.42	NM_018085, NM_018085.5
0	2.72	NM_022755, NM_022755.6
0	1.21	NM_001160042, NM_001160042.2
0	3.21	NM_001197113, NM_001197113.2
0	24	NM_003870, NM_003870.4
0	4.62	NM_178229, NM_178229.5
0	20.03	NM_001569, NM_001569.4
0	2.27	NM_001570, NM_001570.4
0	4.88	NM_001114182, NM_001114182.3
0	1.6	NM_015649, NM_015649.3
0	2.25	NM_006084, NM_006084.5
0	3.19	NM_001007561, NM_001007561.3
0	1.9	NM_003749, NM_003749.3
0	4.7	NM_194279, NM_194279.4
0	24	NM_213595, NM_213595.4
0	24	NM_005101, NM_005101.4
0	6.98	NM_016048, NM_016048.2
0	9.81	NM_024710, NM_024710.3
0	5.71	NM_001199469, NM_001199469.2
0	2.79	NM_001204890, NM_001204890.2
0	24	NM_030790, NM_030790.5
0	3.39	NM_018463, NM_018463.4
0	9.69	NM_002204, NM_002204.4
0	4.73	NM_002205, NM_002205.5
0	17.01	NM_000210, NM_000210.4
0	19.59	NM_002210, NM_002210.5
0	24	NM_133376, NM_133376.3
0	24	NM_021999, NM_021999.5
0	24	NM_030926, NM_030926.6
0	24	NM_033453, NM_033453.4
0	8.91	NM_014216, NM_014216.6
0	1.19	NM_025194, NM_025194.3
0	5.59	NM_002224, NM_002224.4
0	2.39	NM_002226, NM_002226.5
0	5.13	NM_032492, NM_032492.4
0	11.78	NM_002227, NM_002227.4
0	1.21	NM_023007, NM_023007.3
0	2.05	NM_001081461, NM_001081461.2
0	1.82	NM_001114632, NM_001114632.2
0	12.47	NM_001005920, NM_001005920.4
0	2.59	NM_020647, NM_020647.4
0	1.69	NM_002228, NM_002228.4
0	1.17	NM_002229, NM_002229.3
0	2.9	NM_005354, NM_005354.6
0	15.54	NM_002230, NM_002230.4
0	3.73	NM_015493, NM_015493.7
0	2.06	NM_015443, NM_015443.4
0	8.16	NM_152519, NM_152519.4
0	1.83	NM_017822, NM_017822.4
0	4.23	NM_182710, NM_182710.3
0	3.43	NM_007067, NM_007067.5
0	5.39	NM_182958, NM_182958.4
0	4.51	NM_007044, NM_007044.4
0	5.33	NM_020122, NM_020122.5
0	2.48	NM_002245, NM_002245.4
0	4.5	NM_002250, NM_002250.3
0	2.27	NM_001142730, NM_001142730.3
0	3.01	NM_031954, NM_031954.5
0	7.45	NM_024681, NM_024681.4
0	1.59	NM_015353, NM_015353.3
0	3.95	NM_173562, NM_173562.5
0	5.53	NM_016121, NM_016121.5
0	2.23	NM_018992, NM_018992.4
0	6.47	NM_017634, NM_017634.4
[truncated: 6,262 more rows]

## Sheet: n per bin
Supplemental Table 3. List of cumulative uORF length and mRNA half-life re-analyzed from Tani et al. (2012) and Maekawa et al. (2015).
	mRNAs per bin
uORF length bin (codons)	Tani et al. (2012)	Maekawa et al. (2015)
0	4816	4777
2-5	283	279
6-10	357	349
11-15	286	286
16-20	258	256
21-25	215	215
26-30	213	211
31-35	169	168
36-40	136	135
41-45	132	132
46-50	124	123
51-55	120	117
56-60	102	100
